# Supplementary material for: Bridgehead epoxide iso-euphoranin E from β-caryophyllene oxide via sequential cationic formation and scission of [4.3.2]propellane
Source: Royal Society of Chemistry journal article supplement (doi:10.1039/d4qo00940a), 2024-01-01
Supplement: d4qo00940a1.pdf [file d4qo00940a1.pdf]

## Supporting Information

Bridgehead epoxide *iso*-euphoranin E from  
 $\beta$ -caryophyllene oxide via sequential cationic  
formation and scission of [4.3.2]propellane

*Georgijs Stakanovs\**, *Dace Rasina*, *Sergey Belyakov*, *Artis Kinens*, *Aigars Jirgensons\**

### Corresponding Authors

Georgijs Stakanovs – *Latvian Institute of Organic Synthesis, Aizkraukles Str. 21, LV-1006, Riga, Latvia*; e-mail: [georgijs.stakanovs@osi.lv](mailto:georgijs.stakanovs@osi.lv)

Aigars Jirgensons – *Latvian Institute of Organic Synthesis, Aizkraukles Str. 21, LV-1006, Riga, Latvia*; e-mail: [aigars@osi.lv](mailto:aigars@osi.lv)

## CONTENTS

|                                                                                                                                                                                                    |     |
|----------------------------------------------------------------------------------------------------------------------------------------------------------------------------------------------------|-----|
| <b>General information, synthetic procedures and characterization</b> .....                                                                                                                        | S3  |
| <b>Table S1.</b> Occurrence of 4,4-dimethyltetracyclo[6.3.0 <sup>2.5</sup> .0 <sup>1.8</sup> ]tridecan-9-ol in plant extracts .....                                                                | S12 |
| <b>Table S2.</b> NMR spectroscopic data of compound <b>12</b> .....                                                                                                                                | S13 |
| <b>Table S3.</b> NMR spectroscopic data of compound <b>9</b> .....                                                                                                                                 | S14 |
| <b>Table S4.</b> NMR spectroscopic data of compound <b>10</b> .....                                                                                                                                | S15 |
| <b>Table S5.</b> NMR spectroscopic data of compound <b>7</b> .....                                                                                                                                 | S16 |
| <b>Table S6.</b> NMR spectroscopic data of euphoranin E ( <b>2</b> ) .....                                                                                                                         | S17 |
| <b>Table S7.</b> NMR spectroscopic data of <i>iso</i> -euphoranin E ( <b>11</b> ) .....                                                                                                            | S18 |
| <b>Table S8.</b> Comparison of NMR data between synthesized and isolated bridgehead olefin <b>7</b> .....                                                                                          | S19 |
| <b>Table S9.</b> Comparison of <sup>13</sup> C NMR chemical shifts (CDCl <sub>3</sub> ) of euphoranin E and synthetic epoxyalcohol <b>2</b> .....                                                  | S20 |
| <b>Table S10.</b> Comparison of characteristic <sup>1</sup> H NMR signals of euphoranin E and synthetic epoxyalcohol <b>2</b> in CDCl <sub>3</sub> or C <sub>6</sub> D <sub>6</sub> solutions..... | S20 |
| <b>Table S11.</b> Comparison of <sup>13</sup> C NMR chemical shifts (CDCl <sub>3</sub> ) of euphoranin E and synthetic epoxyalcohol <b>11</b> .....                                                | S21 |
| <b>Table S12.</b> Comparison of characteristic <sup>1</sup> H NMR (CDCl <sub>3</sub> ) signals of euphoranin E and synthetic epoxyalcohol <b>11</b> .....                                          | S21 |
| <b>NMR spectra of synthesized compounds</b> .....                                                                                                                                                  | S22 |
| <b>IR spectra</b> .....                                                                                                                                                                            | S70 |
| <b>Mass spectra of synthetic and isolated from nature propellane-containing alcohol 9</b> .....                                                                                                    | S79 |
| <b>X-Ray crystallographic supplementary data for compound 13</b> .....                                                                                                                             | S80 |
| <b>X-Ray crystallographic supplementary data for compound 10</b> .....                                                                                                                             | S82 |
| <b>X-Ray crystallographic supplementary data for compound 7</b> .....                                                                                                                              | S84 |
| <b>X-Ray crystallographic supplementary data for compound 2</b> .....                                                                                                                              | S87 |
| <b>X-Ray crystallographic supplementary data for compound 11</b> .....                                                                                                                             | S90 |
| <b>Procedure for the DFT calculations</b> .....                                                                                                                                                    | S93 |
| <b>Optimized geometries</b> .....                                                                                                                                                                  | S94 |

## General information, synthetic procedures and characterization

**General.** Melting points were detected with an OptiMelt MPA100 melting point apparatus, with a heating rate of 3 °C/min. Specific optical rotations were measured at specified temperature on a Rudolph Research Analytical Autopol VI polarimeter, cell length 100 mm, using the solvent and concentration stated, at 589 nm. Infrared spectra (IR) were obtained using a Shimadzu IR Prestige-21 Fourier-transform IR spectrometer. <sup>1</sup>H, <sup>13</sup>C, and 2D NMR spectra were recorded on 400 MHz Bruker spectrometer using the residual solvent peak as an internal reference. High-resolution molecular masses (HRMS) were determined on a Waters Synapt G2-Si hybrid quadrupole time-of-flight (TOF) mass spectrometer equipped with an electron spray ion source (ESI). Gas chromatographic (GC) analysis was performed on Agilent Technologies gas chromatographer with triple-axis detector, heating range 40–280 °C, column 30 m x 0.25 mm, 0.25 μm, 7 inch cage. Reagents were purchased from commercial sources and used as received. Commercial (–)-β-caryophyllene oxide (CAS 1139-30-6, 95%) was obtained from Sigma-Aldrich. Flash chromatography was carried out using Kieselgel (35–70 μm) silica gel. Thin layer chromatography was performed on TLC silica gel 60 F254 aluminium sheets (Merck) and was visualized by staining with KMnO<sub>4</sub> or cerium ammonium molybdate stain systems.

**Crystal Structure Analysis.** A suitable crystal was selected, and the X-ray crystal data were acquired on an XtaLAB Synergy-S, Dualflex, HyPix diffractometer (Rigaku) with Cu Kα radiation ( $\lambda = 1.54184 \text{ \AA}$ ). The crystal was kept at 150 K (for compounds **13**, **10**, **7**, **11**) or 160 K (for compound **2**) during data collection. The CrysAlis PRO 1.171.40.35a software package was used for intensity data acquisition. Crystal structures were solved and refined by the SHELXT 2014/4 program. Non-hydrogen atoms were refined anisotropically with the full least-squares approximation. Hydrogen-atom positions were calculated geometrically and refined using the riding-model approximation. The absolute configuration of the compounds has been determined both by the anomalous dispersion method and known chiral centers from the parent compound. Single-crystal X-Ray crystallography data, ORTEP drawings and the refinement model description are

available in SI. Crystallographic data for the structures have been deposited in the Cambridge Crystallographic Data Center with deposition numbers 2346928–2346932.

**(1S,5R,9R)-10,10-Dimethyl-2,6-dimethylenebicyclo[7.2.0]undecan-5-ol (6)**

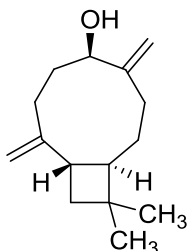

Synthesis and full characterization can be found in previous publications (*Org. Biomol. Chem.* **2022**, *20*, 2455 and *J. Nat. Prod.* **2023**, *86*, 2368).

Diisopropylamine (3.85 ml; 27.5 mmol) was dissolved in anhydrous tetrahydrofuran (THF, 70 mL) and the solution was cooled to 0 °C. A solution (2.0 M) of *n*BuLi in hexanes (13.7 ml, 27.5 mmol) was added dropwise to the mixture. The reaction mixture was stirred for 15 min at

0 °C and a solution of (–)-β-caryophyllene oxide (5.50 g; 25.0 mmol) in anhydrous THF (25 mL) was added dropwise. Reaction mixture was refluxed for 4 h. Then it was allowed to cool down to rt and quenched with saturated aqueous NH<sub>4</sub>Cl solution (100 mL). THF was evaporated under reduced pressure, and the mixture was extracted with Et<sub>2</sub>O (3×100 mL). The organic layer was washed with brine, dried with anhydrous Na<sub>2</sub>SO<sub>4</sub>, filtered, and concentrated under reduced pressure. The residue was purified by column chromatography using EtOAc-hexane (1:4) elution to obtain the title product (5.07 g, 92%) as a light yellow oil.  $[\alpha]_D^{20} +10$  (*c* 0.93, CHCl<sub>3</sub>). <sup>1</sup>H NMR (400 MHz, CDCl<sub>3</sub>) δ (ppm): 5.04 (s, 1H), 4.95 (s, 1H), 4.78 (d, *J* = 1.4 Hz, 1H), 4.76 (d, *J* = 1.4 Hz, 1H), 4.09 (ddd, *J* = 8.9, 3.9, 1.0 Hz, 1H), 2.57 – 2.47 (m, 1H), 2.31 (ddd, *J* = 18.2, 9.5, 5.7 Hz, 2H), 2.09 – 1.89 (m, 2H), 1.89 – 1.68 (m, 4H), 1.68 – 1.49 (m, 4H), 0.98 (s, 6H). <sup>13</sup>C NMR (101 MHz, CDCl<sub>3</sub>) δ (ppm): 152.6, 151.4, 113.6, 109.3, 75.3, 54.4, 44.0, 37.1, 33.6, 33.0, 32.7, 32.6, 30.8, 30.2, 22.1. HRMS *m/z*: 221.1908 [M + H]<sup>+</sup> (calcd for C<sub>15</sub>H<sub>25</sub>O 221.1905).

**(1S,9R)-10,10-Dimethyl-2,6-dimethylenebicyclo[7.2.0]undecan-5-one (8)**

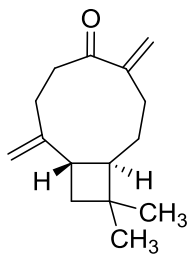

To the solution of allylic alcohol **6** (3.79 g; 17.2 mmol) in dichloromethane (DCM, 40 mL), TEMPO (403 mg; 2.58 mmol) and PhI(OAc)<sub>2</sub> (6.37 g; 19.8 mmol) were subsequently added. Reaction mixture was stirred for 6 h at rt and then was washed by saturated NaHCO<sub>3</sub> aqueous solution and with 20% Na<sub>2</sub>S<sub>2</sub>O<sub>3</sub> aqueous solution. Organic layer was dried with anhydrous Na<sub>2</sub>SO<sub>4</sub>, filtered and

concentrated under reduced pressure. The residue was purified by column chromatography using hexanes/Et<sub>2</sub>O (4:1) elution to obtain title product as a colorless oil (2.85 g, 76%).  $[\alpha]_D^{20} +20$  (*c* 0.98, CHCl<sub>3</sub>). <sup>1</sup>H NMR (400 MHz, CDCl<sub>3</sub>)  $\delta$  (ppm): 5.59 (s, 1H), 5.53 (d, *J* = 1.1 Hz, 1H), 4.96 (d, *J* = 1.2 Hz, 1H), 4.90 (s, 1H), 2.82 (ddd, *J* = 11.6, 6.0, 4.7 Hz, 1H), 2.67 (td, *J* = 11.3, 4.9 Hz, 1H), 2.59 – 2.49 (m, 1H), 2.46 – 2.29 (m, 2H), 2.27 – 2.13 (m, 2H), 1.67 – 1.51 (m, 3H), 1.47 – 1.36 (m, 2H), 0.94 (s, 3H), 0.92 (s, 3H). <sup>13</sup>C NMR (101 MHz, CDCl<sub>3</sub>)  $\delta$  (ppm): 206.3, 151.7, 150.9, 122.5, 112.4, 52.2, 46.6, 41.8, 39.2, 34.7, 33.4, 31.5, 31.0, 29.9, 22.0. HRMS *m/z*: 219.1754 [M + H]<sup>+</sup> (calcd for C<sub>15</sub>H<sub>23</sub>O 219.1749). FT-IR (thin film): 3078, 2946, 2863, 1681, 1636, 1452, 1364, 1347, 1300, 1282, 1176, 1111, 1074, 917, 888 cm<sup>-1</sup>. Spectral data correspond to the literature (*Chem. Nat. Compd.* **2017**, *53*, 66).

**(2aR,4aR,7aR,7bS)-2,2-Dimethyloctahydro-5H-4a,7a-ethanocyclobuta[e]inden-5-one**  
**(12)**

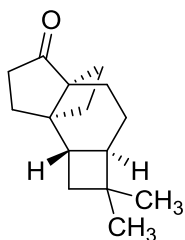

To the solution of enone **8** (2.71 g; 12.4 mmol) in dry MeCN (125 mL) was added AlCl<sub>3</sub> (248 mg; 1.86 mmol) at 0 °C. Reaction mixture was warmed up to rt and was stirred for 1 h. Then saturated NaHCO<sub>3</sub> aqueous solution was added to the mixture and MeCN was evaporated under reduced pressure. Mixture was extracted with Et<sub>2</sub>O and washed with brine. Organic layer was dried with anhydrous Na<sub>2</sub>SO<sub>4</sub>, filtered and concentrated under reduced pressure. The residue was purified by column chromatography using hexanes/Et<sub>2</sub>O (4:1) elution to obtain title product (2.34 g, 87%) as a white crystalline solid (Et<sub>2</sub>O). **mp** 46–48 °C.  $[\alpha]_D^{20} -129$  (*c* 1.00, CHCl<sub>3</sub>). <sup>1</sup>H NMR (400 MHz, CDCl<sub>3</sub>)  $\delta$  (ppm): 2.76 (ddd, *J* = 18.2, 10.5, 9.3 Hz, 1H), 2.41 – 2.27 (m, 2H), 1.97 – 1.82 (m, 4H), 1.78 – 1.69 (m, 2H), 1.66 – 1.52 (m, 5H), 1.49 – 1.40 (m, 1H), 1.30 – 1.20 (m, 1H), 1.09 (s, 3H), 1.04 (s, 3H). <sup>13</sup>C NMR (101 MHz, CDCl<sub>3</sub>)  $\delta$  (ppm): 223.7, 50.6, 47.5, 43.7, 40.7, 39.0, 38.0, 36.0, 33.2, 30.6, 26.7, 24.8, 22.0, 20.9, 19.7. HRMS *m/z*: 219.1752 [M + H]<sup>+</sup> (calcd for C<sub>15</sub>H<sub>23</sub>O 219.1749). FT-IR (thin film): 2944, 2862, 1735, 1455, 1364, 1284, 1065 cm<sup>-1</sup>.

**(2aR,4aR,5S,7aR,7bS)-2,2-Dimethyloctahydro-5H-4a,7a-ethanocyclobuta[e]inden-5-ol (9)**

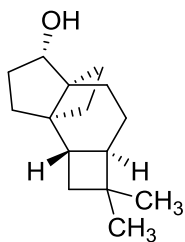

To the solution of ketone **12** (1.90 g; 8.71 mmol) in dry MeOH (90 mL) was added NaBH<sub>4</sub> (330 mg; 8.71 mmol) at rt. Reaction mixture was stirred at rt for 2 h and then was quenched by addition of 1 M HCl aqueous solution. MeOH was evaporated under reduced pressure; the mixture was extracted with Et<sub>2</sub>O and washed with brine. Organic layer was dried with anhydrous Na<sub>2</sub>SO<sub>4</sub>, filtered and concentrated under reduced pressure. The residue was purified by column chromatography using hexanes/EtOAc (4:1) elution to obtain title product (1.77 g, 92%, >10:1 *dr*) as white crystalline solid (EtOAc). **mp** 69–71 °C.  $[\alpha]_D^{20}$  –66.9 (*c* 1.00, CHCl<sub>3</sub>). **<sup>1</sup>H NMR** (400 MHz, CDCl<sub>3</sub>)  $\delta$  (ppm): 3.71 (dd, *J* = 10.5, 6.4 Hz, 1H), 2.16 (ddd, *J* = 12.8, 11.2, 5.4 Hz, 1H), 2.04 – 1.96 (m, 2H), 1.95 – 1.88 (m, 1H), 1.88 – 1.79 (m, 1H), 1.71 – 1.62 (m, 2H), 1.61 – 1.54 (m, 2H), 1.53 – 1.45 (m, 3H), 1.45 – 1.34 (m, 4H), 1.21 (tdd, *J* = 12.7, 6.1, 0.7 Hz, 1H), 1.09 (s, 3H), 1.06 (s, 3H). **<sup>13</sup>C NMR** (101 MHz, CDCl<sub>3</sub>)  $\delta$  (ppm): 82.5, 48.6, 48.0, 42.9, 40.0, 38.8, 35.8, 34.6, 33.2, 30.6, 30.4, 21.8, 21.1, 19.9, 18.7. **HRMS** *m/z*: 203.1801 [M – OH]<sup>+</sup> (calcd for C<sub>15</sub>H<sub>23</sub> 203.1800). **FT-IR** (thin film): 3308, 2952, 2944, 2929, 2862, 2725, 1459, 1363, 1071, 1033 cm<sup>-1</sup>.

**(2aR,4aR,5S,7aR,7bS)-2,2-dimethyloctahydro-5H-4a,7a-ethanocyclobuta[e]inden-5-yl 4-nitrobenzoate (13)**

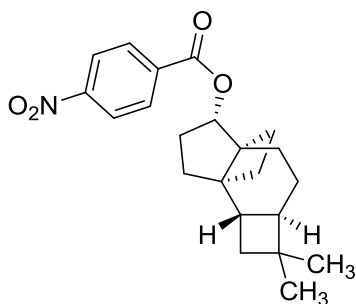

4-Nitrobenzoyl chloride (126 mg; 0.68 mmol) was dissolved in DCM (7 mL). DIPEA (0.24 mL; 1.36 mmol), DMAP (8 mg, 0.06 mmol) and alcohol **9** (100 mg, 0.45 mmol) were subsequently added to the solution at rt. Reaction mixture was stirred for 4 h at rt, quenched with saturated NaHCO<sub>3</sub> aqueous solution. Organic layer was dried with anhydrous Na<sub>2</sub>SO<sub>4</sub>, filtered and concentrated under reduced pressure. The residue was purified by column chromatography using hexanes/EtOAc (20:1) elution to obtain title product (107 mg, 64%) as white crystalline solid (EtOAc). **mp** 168–170 °C.  $[\alpha]_D^{20}$  –41.1 (*c* 1.02, CHCl<sub>3</sub>). **<sup>1</sup>H NMR** (400 MHz, CDCl<sub>3</sub>)  $\delta$  (ppm): 8.30 – 8.25 (m, 2H), 8.21 – 8.17 (m, 2H), 4.97 (dd, *J* = 10.2, 6.5 Hz, 1H), 2.33 – 2.20 (m, 2H), 2.19 – 1.95 (m,

3H), 1.80 – 1.61 (m, 4H), 1.62 – 1.49 (m, 4H), 1.48 – 1.32 (m, 3H), 1.10 (s, 3H), 1.08 (s, 3H).  $^{13}\text{C}$  NMR (101 MHz,  $\text{CDCl}_3$ )  $\delta$  (ppm): 164.8, 150.6, 136.3, 130.8, 123.6, 85.2, 48.5, 48.0, 42.8, 39.6, 39.0, 35.7, 34.9, 30.6, 30.2, 30.1, 22.0, 21.03, 20.98, 18.5. **HRMS**  $m/z$ : 203.1804  $[\text{M} - \text{C}_6\text{H}_4\text{NO}_4]^+$  (calcd for  $\text{C}_{15}\text{H}_{23}$  203.1800). **FT-IR** (thin film): 2955, 2855, 1716, 1715, 1608, 1531, 1461, 1351, 1286, 1125, 1016, 874, 760, 720  $\text{cm}^{-1}$ . The structure was confirmed by single-crystal X-ray analysis. Suitable crystals were prepared by dissolving 10 mg of ester in warm (60 °C) EtOH (1 mL) in a screw-cap 10 mL vial. The cap was set on the top to avoid airborne dust and sealed loosely for the slow evaporation of solvent. After standing for 48 h appropriate crystals for single-crystal X-ray analysis were formed. Crystal data for ester:  $\text{C}_{22}\text{H}_{27}\text{NO}_4$  ( $M = 369.46$  g/mol): orthorhombic, space group  $P2_12_12_1$  (no. 19),  $a = 6.06579(5)$  Å,  $b = 16.68048(13)$  Å,  $c = 18.97466(18)$  Å,  $V = 1919.86(3)$  Å<sup>3</sup>,  $Z = 4$ ,  $T = 150.0(2)$  K,  $\mu(\text{Cu K}\alpha) = 0.705$  mm<sup>-1</sup>,  $D_{\text{calc}} = 1.2781$  g/cm<sup>3</sup>, 12058 reflections measured ( $2\theta \leq 155.0^\circ$ ), 3897 unique ( $R_{\text{int}} = 0.0278$ ,  $R_{\text{sigma}} = 0.0288$ ) which were used in all calculations. The final  $R_1$  was 0.0313 ( $I \geq 2\sigma(I)$ ) and  $wR_2$  was 0.0814 (all data).

**(2aR,4aR,5S,7aR,7bS)-2,2-Dimethyloctahydro-5H-4a,7a-ethanocyclobuta[e]inden-5-yl methanesulfonate (14)**

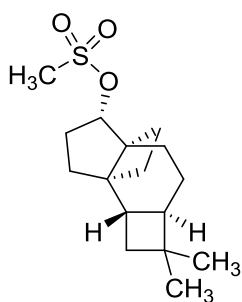

Alcohol **9** (1.58 g; 7.18 mmol) was dissolved in DCM (100 mL). To the solution  $\text{Et}_3\text{N}$  (7 mL; 50.3 mmol) was added and the mixture was cooled to 0 °C.  $\text{MsCl}$  (2.23 mL; 28.7 mmol) was added to the mixture dropwise and then mixture was allowed to warm up to rt. Reaction mixture was stirred for 4 h at rt and then was quenched with saturated  $\text{NaHCO}_3$  aqueous solution. Organic layer was dried with anhydrous  $\text{Na}_2\text{SO}_4$ , filtered and concentrated under reduced pressure. The residue was purified by column chromatography using hexanes/ $\text{Et}_2\text{O}$  (2:1) mixture elution to obtain title product (1.93 g, 90%) as a colorless oil.  $[\alpha]_D^{20} -69.3$  ( $c$  1.00,  $\text{CHCl}_3$ ).  $^1\text{H}$  NMR (400 MHz,  $\text{C}_6\text{D}_6$ )  $\delta$  (ppm): 4.41 (dd,  $J = 10.3, 6.8$  Hz, 1H), 2.23 (s, 3H), 2.10 – 1.96 (m, 4H), 1.93 – 1.81 (m, 1H), 1.72 – 1.57 (m, 1H), 1.55 – 1.40 (m, 4H), 1.39 – 1.22 (m, 5H), 1.07 (s, 3H), 1.03 (s, 3H), 1.00 – 0.89 (m, 1H).  $^{13}\text{C}$  NMR (101 MHz,  $\text{C}_6\text{D}_6$ )  $\delta$  (ppm): 89.7, 47.9, 47.4, 42.9, 39.8, 38.8, 37.7, 35.6, 34.3, 30.9, 30.5, 29.9, 21.8, 21.0,

20.8, 18.5. **HRMS**  $m/z$ : 203.1804 [ $M - \text{CH}_3\text{SO}_3$ ]<sup>+</sup> (calcd for  $\text{C}_{15}\text{H}_{23}$  203.1800). **FT-IR** (thin film): 3032, 2944, 2862, 1459, 1357, 1257, 1176, 962, 887, 854, 756, 530  $\text{cm}^{-1}$ .

**(1*R*,2*S*,5*R*)-4,4-Dimethyltricyclo[6.3.2.0<sup>2,5</sup>]tridec-8-en-1-ol (10)**

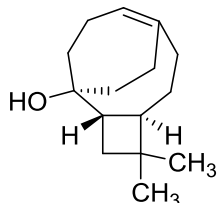

Mesylate **14** (1.88 g; 6.30 mmol) was dissolved in 1,4-dioxane/ $\text{H}_2\text{O}$  (1:1, 60 mL). The solution was refluxed for 16 h and then cooled down to rt. Reaction mixture was quenched with saturated  $\text{NaHCO}_3$  aqueous solution and extracted with  $\text{Et}_2\text{O}$ . Organic layer was washed with brine, dried with anhydrous  $\text{Na}_2\text{SO}_4$ , filtered and concentrated under reduced pressure. The residue was purified by column chromatography using hexanes/ $\text{Et}_2\text{O}$  (2:1) elution to obtain title product (618 mg, 45%) as white crystalline solid ( $\text{Et}_2\text{O}$ ). **mp** 105 °C.  $[\alpha]_D^{20} +24.3$  ( $c$  1.00,  $\text{CHCl}_3$ ). **<sup>1</sup>H NMR** (400 MHz,  $\text{CDCl}_3$ )  $\delta$  (ppm): 5.48 (tt,  $J = 7.3, 1.2$  Hz, 1H), 2.65 (tdd,  $J = 14.4, 5.7, 2.4$  Hz, 1H), 2.44 (ddd,  $J = 12.5, 7.5, 1.1$  Hz, 1H), 2.32 (ddt,  $J = 13.9, 12.0, 8.1$  Hz, 1H), 2.14 – 1.97 (m, 3H), 1.93 (dddd,  $J = 12.6, 11.5, 2.5, 1.1$  Hz, 1H), 1.86 – 1.65 (m, 5H), 1.64 – 1.56 (m, 3H), 1.26 (qd,  $J = 12.2, 7.5$  Hz, 1H), 1.12 (br. s, 1H), 0.96 (s, 3H), 0.92 (s, 3H). **<sup>13</sup>C NMR** (101 MHz,  $\text{CDCl}_3$ )  $\delta$  (ppm): 141.9, 122.8, 74.3, 52.8, 49.1, 44.0, 36.8, 36.2, 33.3, 32.5, 31.7, 30.3, 29.2, 23.7, 21.5. **HRMS**  $m/z$ : 203.1810 [ $M - \text{OH}$ ]<sup>+</sup> (calcd for  $\text{C}_{15}\text{H}_{23}$  203.1800). **FT-IR** (thin film): 3366, 2942, 2855, 1655, 1456, 1442, 1399, 1361, 1330, 1271, 1236, 1217, 1191, 1142, 1114, 1064, 1033, 993, 927, 896, 843, 835, 761, 666  $\text{cm}^{-1}$ . The structure was confirmed by single-crystal X-ray analysis. Suitable crystals were prepared by dissolving 10 mg of alcohol in hexane (1 mL) in a screw-cap 10 mL vial. The cap was set on the top to avoid airborne dust and sealed loosely for the slow evaporation of solvent. After standing for 48 h appropriate crystals for single-crystal X-ray analysis were formed. Crystal data for alcohol:  $\text{C}_{15}\text{H}_{24}\text{O}$  ( $M = 220.36$  g/mol): trigonal, space group  $P3_1$  (no. 144),  $a = 13.3360(4)$  Å,  $c = 6.2105(2)$  Å,  $V = 956.56(5)$  Å<sup>3</sup>,  $Z = 3$ ,  $T = 150.0(1)$  K,  $\mu(\text{Cu K}\alpha) = 0.523$   $\text{mm}^{-1}$ ,  $D_{\text{calc}} = 1.1475$   $\text{g/cm}^3$ , 5016 reflections measured ( $2\theta \leq 155.0^\circ$ ), 2221 unique ( $R_{\text{int}} = 0.0256$ ,  $R_{\text{sigma}} = 0.0311$ ) which were used in all calculations. The final  $R_1$  was 0.0302 ( $I \geq 2\sigma(I)$ ) and  $wR_2$  was 0.0765 (all data).



**(1S,2S,5R)-4,4-Dimethyltricyclo[6.3.2.0<sup>2,5</sup>]tridec-8-en-1-ol (7)**

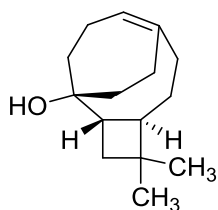

To the mixture of allylic alcohol **6** (1.50 g; 6.81 mmol) and Et<sub>3</sub>N in 40 mL of dry THF, MsCl (0.63 mL; 8.17 mmol) was added dropwise at -20 °C. Reaction mixture was stirred for 2 h at -20 °C and then filtered. The filtrate was concentrated under reduced pressure, giving a crude allylic mesylate **8**, to which water (30 mL) and THF (30 mL) were added. Mixture was stirred at rt for 12 h and then reaction was quenched with saturated NaHCO<sub>3</sub> aqueous solution. THF was evaporated under reduced pressure and the mixture was extracted with Et<sub>2</sub>O and washed with brine. Organic layer was dried with anhydrous Na<sub>2</sub>SO<sub>4</sub>, filtered and concentrated under reduced pressure. The residue was purified by column chromatography using hexanes/EtOAc (4:1) elution to obtain starting allylic alcohol **6** (224 mg, 15%) and the title product (552 mg, 37%) as white crystalline solid (EtOAc). **mp** 147–148 °C.  $[\alpha]_D^{26} +170$  (*c* 0.98, CHCl<sub>3</sub>). **<sup>1</sup>H NMR** (400 MHz, CDCl<sub>3</sub>)  $\delta$  (ppm): 5.40 (td, *J* = 8.0, 2.9 Hz, 1H), 2.50 – 2.34 (m, 2H), 2.31 – 2.24 (m, 1H), 2.18 (tdd, *J* = 13.5, 4.4, 1.1 Hz, 1H), 2.09 (dd, *J* = 11.7, 7.4 Hz, 1H), 2.03 – 1.95 (m, 1H), 1.94 – 1.85 (m, 2H), 1.77 (td, *J* = 11.3, 7.8 Hz, 1H), 1.67 – 1.48 (m, 4H), 1.47 – 1.35 (m, 3H), 1.12 (br. s, 1H), 0.98 (s, 6H). **<sup>13</sup>C NMR** (101 MHz, CDCl<sub>3</sub>)  $\delta$  (ppm): 138.2, 126.2, 75.3, 52.1, 47.9, 37.7, 36.6, 35.5, 33.6, 33.5, 30.1, 26.3, 24.7, 23.8, 22.0. **HRMS** *m/z*: 203.1801 [M – OH]<sup>+</sup> (calcd for C<sub>15</sub>H<sub>23</sub> 203.1800). **FT-IR** (thin film): 3369, 2952, 2854, 1661, 1457, 1430, 1360, 1277, 1238, 1193, 1115, 1089, 1048, 991, 924, 886, 854, 799, 668, 636, 600, 582, 526 cm<sup>-1</sup>. The structure was confirmed by single-crystal X-ray analysis. Suitable crystals were prepared by dissolving 10 mg of alcohol in hexane (1 mL) in a screw-cap 10 mL vial. The cap was set on the top to avoid airborne dust and sealed loosely for the slow evaporation of solvent. After standing for 48 h appropriate crystals for single-crystal X-ray analysis were formed. Crystal data for alcohol: C<sub>15</sub>H<sub>24</sub>O (*M* = 220.34 g/mol): trigonal, space group *P*3<sub>2</sub> (no. 145), *a* = 13.0367(2) Å, *c* = 6.6998(1) Å, *V* = 986.12(3) Å<sup>3</sup>, *Z* = 3, *T* = 160.0(1) K,  $\mu$ (CuK $\alpha$ ) = 0.508 mm<sup>-1</sup>, *D*<sub>calc</sub> = 1.113 g/cm<sup>3</sup>, 9553 reflections measured (2 $\theta$  ≤ 160.0°), 2086 unique (*R*<sub>int</sub> = 0.0306, *R*<sub>sigma</sub> = 0.0240) which were used in all calculations. The final *R*<sub>1</sub> was 0.0306 (*I* > 2 $\sigma$ (*I*)) and *wR*<sub>2</sub> was 0.0824 (all data).

## Euphoranin E (2)

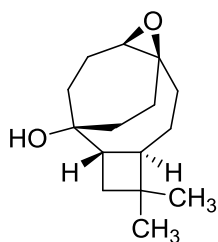

To the solution of alcohol **7** (200 mg; 0.91 mmol) in (DCM, 15 mL) *m*CPBA (70%, 336 mg; 1.36 mmol) was added portionwise. After 2 h, reaction mixture was sequentially washed with saturated Na<sub>2</sub>SO<sub>3</sub> and NaHCO<sub>3</sub> aqueous solutions. Organic phase was dried with anhydrous Na<sub>2</sub>SO<sub>4</sub>, filtered, concentrated under reduced pressure. The residue was purified via column chromatography using 1:1 hexane/Et<sub>2</sub>O to pure Et<sub>2</sub>O gradient elution to obtain title product (139 mg, 65%) as white crystalline solid (Et<sub>2</sub>O). **mp** 199–201 °C.  $[\alpha]_D^{20} +70.5$  (*c* 1.00, CHCl<sub>3</sub>). **<sup>1</sup>H NMR** (400 MHz, CDCl<sub>3</sub>)  $\delta$  (ppm): 2.76 (dd, *J* = 8.9, 6.0 Hz, 1H), 2.40 – 2.27 (m, 1H), 2.26 – 2.12 (m, 3H), 2.05 (dt, *J* = 13.0, 6.5 Hz, 1H), 2.01 – 1.89 (m, 2H), 1.80 – 1.66 (m, 2H), 1.65 – 1.54 (m, 3H), 1.53 – 1.36 (m, 3H), 1.25 (br. s, 1H), 1.02 (s, 6H), 0.92 – 0.77 (m, 1H). **<sup>1</sup>H NMR** (400 MHz, C<sub>6</sub>D<sub>6</sub>)  $\delta$  (ppm): 2.43 (dd, *J* = 9.0, 6.0 Hz, 1H), 2.07 – 1.94 (m, 2H), 1.94 – 1.77 (m, 4H), 1.65 (dddd, *J* = 16.0, 10.9, 9.6, 1.1 Hz, 1H), 1.57 – 1.44 (m, 3H), 1.41 – 1.24 (m, 3H), 1.19 – 1.01 (m, 2H), 0.92 (s, 3H), 0.89 (s, 3H), 0.75 (dddd, *J* = 12.6, 11.4, 8.1, 1.0 Hz, 1H), 0.52 (br. s, 1H). **<sup>13</sup>C NMR** (101 MHz, CDCl<sub>3</sub>)  $\delta$  (ppm): 74.8, 64.9, 59.4, 50.5, 45.8, 36.1, 34.9, 33.7, 33.5, 31.9, 30.1, 26.8, 25.8, 24.3, 21.5. **HRMS** *m/z*: 219.1748 [M – OH]<sup>+</sup> (calcd for C<sub>15</sub>H<sub>23</sub>O 219.1749). **FT-IR** (thin film): 3355, 2953, 2859, 1730, 1457, 1362, 1348, 1286, 1238, 1201, 1093, 1052, 1039, 1024, 997, 987, 951, 931, 922, 892, 821, 753, 683, 629, 576 cm<sup>-1</sup>. The structure was confirmed by single-crystal X-ray analysis. Suitable crystals were prepared by dissolving 10 mg of alcohol in *n*-pentane (1 mL) in a screw-cap 10 mL vial. The cap was set on the top to avoid airborne dust and sealed loosely for the slow evaporation of solvent. After standing for 48 h appropriate crystals for single-crystal X-ray analysis were formed. Crystal data for epoxyalcohol: C<sub>15</sub>H<sub>24</sub>O<sub>2</sub> (*M* = 236.36 g/mol): trigonal, space group *P*3<sub>2</sub> (no. 145), *a* = 13.0332(1) Å, *c* = 6.70964(7) Å, *V* = 987.04(2) Å<sup>3</sup>, *Z* = 3, *T* = 150.0(1) K,  $\mu$ (Cu K $\alpha$ ) = 0.599 mm<sup>-1</sup>, *D*<sub>calc</sub> = 1.1928 g/cm<sup>3</sup>, 9171 reflections measured (2 $\Theta$  ≤ 160.0°), 2601 unique (*R*<sub>int</sub> = 0.0177, *R*<sub>sigma</sub> = 0.0156) which were used in all calculations. The final *R*<sub>1</sub> was 0.0297 (*I* > 2 $\sigma$ (*I*)) and *wR*<sub>2</sub> was 0.0770 (all data).

### *iso*-Euphoranin E (11)

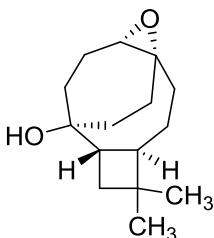

To the solution of alcohol **10** (511 mg; 2.32 mmol) in DCM (25 mL) *m*CPBA (70%, 858 mg; 3.48 mmol) was added portionwise. After 2 h, reaction mixture was sequentially washed with saturated Na<sub>2</sub>SO<sub>3</sub> and NaHCO<sub>3</sub> aqueous solutions. Organic phase was dried with anhydrous Na<sub>2</sub>SO<sub>4</sub>, filtered, concentrated under reduced pressure. The residue was purified via column chromatography using 1:1 hexanes/Et<sub>2</sub>O to pure Et<sub>2</sub>O gradient elution. The collected fraction was triturated with *n*-pentane, filtered and dried to yield the first crop of white crystalline solid (285 mg, 52%). The filtrate was evaporated, triturated with *n*-pentane, centrifuged and dried to yield the second crop (67 mg, 12%). **mp** 109 °C.  $[\alpha]_D^{20} +75.8$  (*c* 1.00, CHCl<sub>3</sub>). **<sup>1</sup>H NMR** (400 MHz, CDCl<sub>3</sub>)  $\delta$  (ppm): 3.02 (dd, *J* = 8.2, 5.9 Hz, 1H), 2.28 – 2.17 (m, 2H), 2.12 (dddd, *J* = 12.7, 9.2, 7.3, 1.7 Hz, 1H), 2.06 – 1.84 (m, 5H), 1.84 – 1.74 (m, 1H), 1.73 – 1.57 (m, 4H), 1.57 – 1.46 (m, 2H), 1.36 – 1.24 (m, 1H), 1.20 (s, 1H), 1.00 (s, 3H), 0.99 (s, 3H). **<sup>13</sup>C NMR** (101 MHz, CDCl<sub>3</sub>)  $\delta$  (ppm): 73.3, 60.7, 57.7, 49.3, 48.2, 42.1, 37.1, 36.0, 32.6, 32.1, 31.0, 30.3, 26.0, 25.9, 21.6. **HRMS** *m/z*: 219.1751 [M – OH]<sup>+</sup> (calcd for C<sub>15</sub>H<sub>23</sub>O 219.1749). **FT-IR** (thin film): 3434, 2952, 2929, 2866, 1719, 1477, 1456, 1405, 1366, 1335, 1289, 1201, 1133, 1077, 1038, 979, 938, 916, 860, 834, 760, 572 cm<sup>-1</sup>. The structure was confirmed by single-crystal X-ray analysis. Suitable crystals were prepared by dissolving 10 mg of epoxyalcohol in *n*-pentane (1 mL) in a screw-cap 10 mL vial. The cap was set on the top to avoid airborne dust and sealed loosely for the slow evaporation of solvent. After standing for 48 h appropriate crystals for single-crystal X-ray analysis were formed. Crystal data for epoxyalcohol: C<sub>60</sub>H<sub>96</sub>O<sub>8</sub> (*M* = 945.43 g/mol): monoclinic, space group *P*2<sub>1</sub> (no. 4), *a* = 9.3483(1) Å, *b* = 17.5247(3) Å, *c* = 16.1772(2) Å,  $\beta$  = 90.546(1)°, *V* = 2650.13(6) Å<sup>3</sup>, *Z* = 2, *T* = 170.0(1) K,  $\mu$ (Cu K $\alpha$ ) = 0.595 mm<sup>-1</sup>, *D*<sub>calc</sub> = 1.1847 g/cm<sup>3</sup>, 47326 reflections measured (2 $\Theta$  ≤ 160.0°), 11054 unique (*R*<sub>int</sub> = 0.0522, *R*<sub>sigma</sub> = 0.0330) which were used in all calculations. The final *R*<sub>1</sub> was 0.0536 (*I* > 2 $\sigma$ (*I*)) and *wR*<sub>2</sub> was 0.1474 (all data).

**Table S1.** Occurrence of 4,4-dimethyltetracyclo[6.3.0<sup>2,5</sup>.0<sup>1,8</sup>]tridecan-9-ol in plant extracts

| 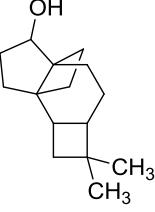 |               |                                                             |
|-----------------------------------------------------------------------------------|---------------|-------------------------------------------------------------|
| Plant species                                                                     | Percentage, % | Reference                                                   |
| <i>Ageratum conyzoides</i>                                                        | 0.04          | <i>C. R. Chim.</i> <b>2004</b> , 7 (10–11), 1019            |
| <i>Patrinia scabra</i>                                                            | 0.24–13.42    | <i>Chem. Biodivers.</i> <b>2005</b> , 2 (10), 1351          |
| <i>Artemisia scoparia</i>                                                         | 1.98          | <i>Food Chem.</i> <b>2009</b> , 114 (2), 642                |
| <i>Polygonum minus</i>                                                            | 0.122         | <i>Molecules</i> <b>2010</b> , 15 (10), 7006                |
| <i>Salvia elegans</i>                                                             | 4.02          | <i>Pharm. Biol.</i> <b>2010</b> , 49 (5), 456               |
| <i>Solanum erianthum</i>                                                          | 2.8           | <i>J. Essent. Oil. Bear. Pl.</i> <b>2012</b> , 15 (3), 387  |
| <i>Carthamus tinctorius</i>                                                       | 2.15          | <i>Acta Chromatogr.</i> <b>2012</b> , 24 (4), 653           |
| <i>Pricasma quassioides</i>                                                       | 3.08          | <i>Chin. Herb. Med.</i> <b>2013</b> , 5 (1), 73             |
| <i>Murraya koenigii</i>                                                           | 3.6           | <i>Food Res. Int.</i> <b>2013</b> , 52 (1), 8               |
| <i>Wedelia biflora</i>                                                            | 0.17          | <i>Asian J. Chem.</i> <b>2013</b> , 25 (9), 5051            |
| <i>Blumea balsamifera</i>                                                         | 0.83          | <i>Asian J. Chem.</i> <b>2013</b> , 25 (11), 6361           |
| <i>Psidium guajava</i>                                                            | 12.975        | <i>J. Essent. Oil. Bear. Pl.</i> <b>2014</b> , 17 (6), 1293 |
| <i>Feronia elephantum</i>                                                         | 0.91          | <i>Int. J. Pharm. Pharm. Sci.</i> <b>2014</b> , 6 (7), 2010 |
| <i>Broussonetia papyrifera</i>                                                    | 0.66          | <i>Int. J. Pharm. Sci. Res.</i> <b>2015</b> , 6 (9), 3954   |
| <i>Plectranthus amboinicus</i>                                                    | 0.2           | <i>Int. J. Pharm. Pharm. Sci.</i> <b>2016</b> , 8 (8), 223  |
| <i>Debregeasia longifolia</i>                                                     | 0.93          | <i>Int. J. Pharm.</i> <b>2016</b> , 6 (1), 124              |
| <i>Cullen plicata</i>                                                             | 1.68          | <i>Ind. Crops Prod.</i> <b>2016</b> , 8, 36                 |
| <i>Syzygium aromaticum</i>                                                        | 0.13          | <i>J. Biol. Act. Prod. Nat.</i> <b>2017</b> , 7 (6), 452    |
|                                                                                   | not reported  | <i>Arch. Microbiol.</i> <b>2022</b> , 204 (11), 674         |
| <i>Sideritis clandestine ssp peloponnesiaca</i>                                   | 0.2–1.36      | <i>J. Chromatogr. A</i> <b>2017</b> , 1524, 290             |
| <i>Humulus lupulus</i>                                                            | 0.07          | <i>J. Chromatogr. A</i> <b>2018</b> , 1536, 110             |
| <i>Achillea wilhelmsii</i>                                                        | not reported  | <i>J. Chem.</i> <b>2019</b> , 2019, 5734257                 |
| <i>Myrtus communis</i>                                                            | 0.67          | <i>J. Anal. Chem.</i> <b>2019</b> , 74 (8), 756             |
| <i>Artemisia nilagirica</i>                                                       | 1.99          | <i>Molecules</i> <b>2021</b> , 26 (16), 4905                |
| <i>Lavandula latifolia</i>                                                        | 0.0177        | <i>Int. J. Pharm. Sci. Res.</i> <b>2021</b> , 12 (1), 668   |
| <i>Tagetes lucida</i>                                                             | 5.3           | <i>Nat. Prod. Res.</i> <b>2021</b> , 36 (18), 4745          |
| <i>Cornus macrophylla</i>                                                         | 1.52          | <i>Molecules</i> <b>2022</b> , 27 (13), 4081                |

**Table S2.** NMR spectroscopic data of compound **12**

| 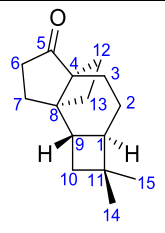 |                             |                            |                                   |                                                                  |
|-----------------------------------------------------------------------------------|-----------------------------|----------------------------|-----------------------------------|------------------------------------------------------------------|
| Position                                                                          | $\delta_{\text{H}}$ (J, Hz) | $\delta_{\text{C}}$ , type | $^1\text{H}$ - $^1\text{H}$ NOESY | HMBC (C $\rightarrow$ H)                                         |
| <b>1</b>                                                                          | 1.88, m*                    | 43.7, CH                   | H-2 $\beta$ , -3 $\beta$ , -15    | H-14, -15                                                        |
| <b>2<math>\beta</math></b>                                                        | 1.30 – 1.20, m              | 19.7, CH <sub>2</sub>      | H-1, -2 $\alpha$                  | H-3                                                              |
| <b>2<math>\alpha</math></b>                                                       | 1.59, m*                    |                            | H-2 $\beta$                       |                                                                  |
| <b>3<math>\beta</math></b>                                                        | 1.60, m*                    | 24.8, CH <sub>2</sub>      | H-1, -2 $\beta$ , -3 $\alpha$     | H-1                                                              |
| <b>3<math>\alpha</math></b>                                                       | 1.75, m*                    |                            | H-3 $\beta$                       |                                                                  |
| <b>4</b>                                                                          | –                           | 50.6, C                    | –                                 | H-2 $\beta$ , -2 $\alpha$ , -7, -9, -12                          |
| <b>5</b>                                                                          | –                           | 223.7, C                   | –                                 | H-3 $\beta$ , -3 $\alpha$ , -6 $\beta$ , -6 $\alpha$ , -12, -13  |
| <b>6<math>\beta</math></b>                                                        | 2.37, m*                    | 38.0, CH <sub>2</sub>      | H-6 $\alpha$ , -7 $\beta$         | H-12, -13                                                        |
| <b>6<math>\alpha</math></b>                                                       | 2.76, ddd (18.2, 10.5, 9.3) |                            | H-6 $\beta$ , -7 $\alpha$ , -9    |                                                                  |
| <b>7<math>\beta</math></b>                                                        | 1.66, m*                    | 33.2, CH <sub>2</sub>      | H-6 $\beta$ , -7 $\alpha$         | H-6 $\beta$ , -6 $\alpha$ , -12                                  |
| <b>7<math>\alpha</math></b>                                                       | 1.95, m*                    |                            | H-6 $\alpha$ , -7 $\beta$         |                                                                  |
| <b>8</b>                                                                          | –                           | 47.5, C                    | –                                 | H-6 $\beta$ , -6 $\alpha$ , -9, -10 $\beta$ , -10 $\alpha$ , -12 |
| <b>9</b>                                                                          | 1.62, m*                    | 40.7, CH                   | H-6 $\alpha$ , -14                | H-10 $\beta$ , -10 $\alpha$ , -12                                |
| <b>10<math>\beta</math></b>                                                       | 1.49 – 1.40, m              | 36.0, CH <sub>2</sub>      | H-10 $\alpha$ , -15               | H-1, -9, -14, -15                                                |
| <b>10<math>\alpha</math></b>                                                      | 1.60, m*                    |                            | H-10 $\beta$ , -14                |                                                                  |
| <b>11</b>                                                                         | –                           | 39.0, C                    | –                                 | H-14, -15                                                        |
| <b>12</b>                                                                         | 2.37, m*<br>1.75, m*        | 22.0, CH <sub>2</sub>      | H-13                              | H-13                                                             |
| <b>13</b>                                                                         | 1.93, m*                    | 26.7, CH <sub>2</sub>      | H-12                              | H-12                                                             |
| <b>14</b>                                                                         | 1.04, s                     | 20.9, CH <sub>3</sub>      | H-9, -10 $\alpha$                 | H-10 $\beta$ , -15                                               |
| <b>15</b>                                                                         | 1.09, s                     | 30.6, CH <sub>3</sub>      | H-1, -10 $\beta$                  | H-1, -10 $\alpha$ , -15                                          |

\* proton signal partly overlaps with other signal; approximate position was assigned by HSQC spectrum

**Table S3.** NMR spectroscopic data of compound **9**

| 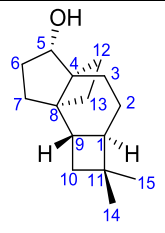 |                                         |                            |                                      |                            |
|-----------------------------------------------------------------------------------|-----------------------------------------|----------------------------|--------------------------------------|----------------------------|
| Position                                                                          | $\delta_{\text{H}}$ , (J, Hz)           | $\delta_{\text{C}}$ , type | $^1\text{H}$ - $^1\text{H}$<br>NOESY | HMBC (C→H)                 |
| <b>1</b>                                                                          | 1.98, m*                                | 42.9, CH                   | H-10, -15                            | H-2, -3, -9, -10, -14, -15 |
| <b>2</b>                                                                          | 1.55, m*<br>1.39, m*                    | 18.7, CH <sub>2</sub>      | H-13                                 | H-9, -10                   |
| <b>3</b>                                                                          | 1.95 – 1.88, m<br>1.39, m*              | 19.9, CH <sub>2</sub>      | H-13                                 | H-5, -13                   |
| <b>4</b>                                                                          | –                                       | 48.6, C                    | –                                    | H-3, -7, -9, -13           |
| <b>5</b>                                                                          | 3.71, dd (10.5, 6.4)                    | 82.5, CH                   | H-6, -7                              | H-3, -6, -7, -12           |
| <b>6</b>                                                                          | 2.00, m*<br>1.88 – 1.79, m              | 33.2, CH <sub>2</sub>      | H-5, -7                              | H-5, -13                   |
| <b>7</b>                                                                          | 1.50, m*<br>1.21, tdd (12.7, 6.1, 0.7)  | 34.6, CH <sub>2</sub>      | H-5, -6                              | H-6, -9                    |
| <b>8</b>                                                                          | –                                       | 48.0, C                    | –                                    | H-1, -7, -10 -13           |
| <b>9</b>                                                                          | 1.67, m*                                | 40.0, CH                   | H-10, -14                            | H-1, -6, -7, -10, -13      |
| <b>10</b>                                                                         | 1.50, m*<br>1.38, m*                    | 35.8, CH <sub>2</sub>      | H-1, -9                              | H-1, -2, -7                |
| <b>11</b>                                                                         | –                                       | 38.8, C                    | –                                    | H-1, -10, -14, -15         |
| <b>12</b>                                                                         | 1.67, m*<br>1.48, m*                    | 30.4, CH <sub>2</sub>      | H-13                                 | H-5                        |
| <b>13</b>                                                                         | 2.16, ddd (12.8, 11.2, 5.4)<br>1.40, m* | 21.8, CH <sub>2</sub>      | H-2, -3, -12                         | H-1, -3, -7 -9, -12        |
| <b>14</b>                                                                         | 1.06, s                                 | 21.1, CH <sub>3</sub>      | H-9, -15                             | H-1, -10, -15              |
| <b>15</b>                                                                         | 1.09, s                                 | 30.6, CH <sub>3</sub>      | H-1, -14                             | H-10, -14                  |

\* proton signal partly overlaps with other signal; approximate position assigned by HSQC spectrum

**Table S4.** NMR spectroscopic data of compound **10**

| 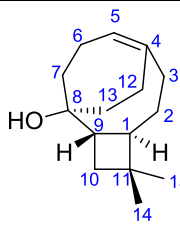 |                                                                 |                            |                                      |                                                |
|-----------------------------------------------------------------------------------|-----------------------------------------------------------------|----------------------------|--------------------------------------|------------------------------------------------|
| Position                                                                          | $\delta_{\text{H}}$ , (J, Hz)                                   | $\delta_{\text{C}}$ , type | $^1\text{H}-^1\text{H}$ NOESY        | HMBC (C $\rightarrow$ H)                       |
| <b>1</b>                                                                          | 1.77, m                                                         | 49.1, CH                   | H-15                                 | H-2 $\alpha$ , -3 $\alpha$ , -9, -10, -14, -15 |
| <b>2<math>\beta</math></b>                                                        | 1.69, m*                                                        | 32.5, CH <sub>2</sub>      | H-3 $\beta$                          | H-3 $\alpha$                                   |
| <b>2<math>\alpha</math></b>                                                       | 1.26, qd (12.2, 7.5)                                            |                            | H-3 $\alpha$ , -5, -9, -14           |                                                |
| <b>3<math>\beta</math></b>                                                        | 1.61, m*                                                        | 36.8, CH <sub>2</sub>      | H-2 $\beta$                          | H-2 $\alpha$ , -12                             |
| <b>3<math>\alpha</math></b>                                                       | 2.44, ddd (12.5, 7.5, 1.1)                                      |                            | H-2 $\alpha$ , -5                    |                                                |
| <b>4</b>                                                                          | –                                                               | 141.9, C                   | –                                    | H-3 $\beta$ , -3 $\alpha$ , -6, -12            |
| <b>5</b>                                                                          | 5.48, tt (7.3, 1.2)                                             | 122.8, CH                  | H-2 $\alpha$ , -3 $\alpha$ , -6, -12 | H-3 $\beta$ , -3 $\alpha$ , -6, -12            |
| <b>6</b>                                                                          | 2.32, ddt (13.9, 12.0, 8.1)<br>2.08, m*                         | 23.7, CH <sub>2</sub>      | H-5, -7                              | H-7                                            |
| <b>7</b>                                                                          | 1.78, m*                                                        | 44.0                       | H-6                                  | H-6                                            |
| <b>8</b>                                                                          | –                                                               | 74.3, C                    | –                                    | H-6, -10, -12                                  |
| <b>9</b>                                                                          | 2.02, m*                                                        | 52.8, CH                   | H-2 $\alpha$ , -14                   | H-1, -2, -6, -7, -10                           |
| <b>10</b>                                                                         | 1.61, m*                                                        | 36.2, CH <sub>2</sub>      | H-14, -15                            | H-1, -9, -14, -15                              |
| <b>11</b>                                                                         | –                                                               | 31.7, C                    | –                                    | H-10, -14, -15                                 |
| <b>12</b>                                                                         | 2.65, tdd (14.4, 5.7, 2.4)<br>1.93, dddd (12.6, 11.5, 2.5, 1.1) | 29.2, CH <sub>2</sub>      | H-5, -13                             | H-3, -13                                       |
| <b>13</b>                                                                         | 2.08, m*<br>1.72, m*                                            | 33.3, CH <sub>2</sub>      | H-12                                 | H-9, -12                                       |
| <b>14</b>                                                                         | 0.92, s                                                         | 21.5, CH <sub>3</sub>      | H-2 $\alpha$ , -9, -10, -15          | H-10, -15                                      |
| <b>15</b>                                                                         | 0.96, s                                                         | 30.3, CH <sub>3</sub>      | H-1, -10, -14                        | H-10, -14                                      |

\* proton signal partly overlaps with other signal; approximate position was assigned by HSQC spectrum

**Table S5.** NMR spectroscopic data of compound **7**

| 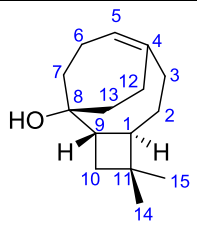 |                                              |                                          |                                   |                          |
|-----------------------------------------------------------------------------------|----------------------------------------------|------------------------------------------|-----------------------------------|--------------------------|
| Position                                                                          | $\delta_{\text{H}}$ , (J, Hz)                | $\delta_{\text{C}}$ , type               | $^1\text{H}$ - $^1\text{H}$ NOESY | HMBC (C $\rightarrow$ H) |
| <b>1</b>                                                                          | 1.64, m*                                     | 47.9, CH                                 | H-15                              | H-2, -3, -10, -14, -15   |
| <b>2</b>                                                                          | 1.58, m*<br>1.41, m*                         | 26.3, CH <sub>2</sub>                    | H-3, -12                          | H-1, -3, -9              |
| <b>3</b>                                                                          | 2.09, dd (11.7, 7.4)<br>1.77, td (11.3, 7.8) | 36.5, CH <sub>2</sub>                    | H-2, -5                           | H-1, -2, -5, -12         |
| <b>4</b>                                                                          | –                                            | 138.2, C                                 | –                                 | H-2, -3 -6, -12, -13     |
| <b>5</b>                                                                          | 5.40, td (8.0, 2.9)                          | 126.2, CH                                | H-3, -6                           | H-2, -3, -6, -7, -12     |
| <b>6</b>                                                                          | 2.41, m*<br>1.89, m*                         | 23.8, CH <sub>2</sub>                    | H-5, -7, -12                      | H-7                      |
| <b>7</b>                                                                          | 2.18, tdd (13.5, 4.4, 1.1)<br>1.41, m*       | 35.5, CH <sub>2</sub>                    | H-7                               | H-6                      |
| <b>8</b>                                                                          | –                                            | 75.2, C                                  | –                                 | H-1, -6, -7, -10, -12    |
| <b>9</b>                                                                          | 1.88, m*                                     | 52.1, CH                                 | H-13, -14                         | H-2, -7, -10, -13        |
| <b>10</b>                                                                         | 1.52, m*<br>1.43, m*                         | 33.6, CH <sub>2</sub>                    | H-14, -15                         | H -14, -15               |
| <b>11</b>                                                                         | –                                            | 33.5, C                                  | –                                 | H-9, -14, -15            |
| <b>12</b>                                                                         | 2.41, m*<br>1.99, m                          | 24.7, CH <sub>2</sub>                    | H-2, -6, -13                      | H-3, -5, -13             |
| <b>13</b>                                                                         | 2.27, m<br>1.49, m*                          | 37.7, CH <sub>2</sub>                    | H-9, -12                          | H-7, -9, -12             |
| <b>14, 15</b>                                                                     | 0.98, s                                      | 30.1, 22.0<br>2 $\times$ CH <sub>3</sub> | H-1, -9, -10                      | H-1, -10                 |

\* proton signal partly overlaps with other signal; approximate position was assigned by HSQC spectrum



**Table S6.** NMR spectroscopic data of euphoranin E (**2**)

| 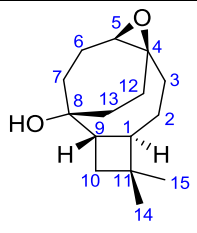 |                               |                                           |                                   |                          |
|-----------------------------------------------------------------------------------|-------------------------------|-------------------------------------------|-----------------------------------|--------------------------|
| Position                                                                          | $\delta_{\text{H}}$ , (J, Hz) | $\delta_{\text{C}}$ , type                | $^1\text{H}$ - $^1\text{H}$ NOESY | HMBC (C $\rightarrow$ H) |
| <b>1</b>                                                                          | 1.73, m*                      | 45.8, CH                                  | H-3, -5, -7, -10, -15             | H-3, -9, -13, -14, -15   |
| <b>2</b>                                                                          | 1.97, m                       | 24.3, CH <sub>2</sub>                     | H-3, -12                          | H-3, -9                  |
| <b>3</b>                                                                          | 2.05, dt<br>0.86, m           | 36.1, CH <sub>2</sub>                     | H-1, -2, -5, -13                  | H-1, -5                  |
| <b>4</b>                                                                          | –                             | 59.4, C                                   | –                                 | H-2, -3, -6, -13         |
| <b>5</b>                                                                          | 2.76, dd (8.9, 6.0)           | 64.9, CH                                  | H-1, -3, -6                       | H-2, -3, -6, -7          |
| <b>6</b>                                                                          | 2.21, m*<br>1.55, m*          | 26.8, CH <sub>2</sub>                     | H-5                               | H-3, -5                  |
| <b>7</b>                                                                          | 2.34, m<br>1.56, m*           | 31.9, CH <sub>2</sub>                     | H-1, -13                          | H-6                      |
| <b>8</b>                                                                          | –                             | 74.8, C                                   | –                                 | H-1, -2, -7              |
| <b>9</b>                                                                          | 2.17, m*                      | 50.5, CH                                  | H-14                              | H-1, -7                  |
| <b>10</b>                                                                         | 1.62, m*<br>1.49, m*          | 33.5, CH <sub>2</sub>                     | H-1, -14, -15                     | H-1, -9, -14, -15        |
| <b>11</b>                                                                         | –                             | 33.7, C                                   | –                                 | H-1, -9, -14, -15        |
| <b>12</b>                                                                         | 2.18, m*<br>1.39, m*          | 34.9, CH <sub>2</sub>                     | H-2                               | H-2, -7                  |
| <b>13</b>                                                                         | 1.71, m*<br>1.46, m*          | 25.8, CH <sub>2</sub>                     | H-3, -7                           | H-13                     |
| <b>14, 15</b>                                                                     | 1.02, s                       | 30.1, 21.5,<br>2 $\times$ CH <sub>3</sub> | H-1, -9, -10                      | H-1, -10                 |

\* proton signal partly overlaps with other signal; approximate position was assigned by HSQC spectrum

**Table S7.** NMR spectroscopic data of *iso*-euphoranin E (**11**)

| Position  | $\delta_{\text{H}}$ , (J, Hz)                   | $\delta_{\text{C}}$ , type | $^1\text{H}$ - $^1\text{H}$ NOESY | HMBC (C $\rightarrow$ H) |
|-----------|-------------------------------------------------|----------------------------|-----------------------------------|--------------------------|
| <b>1</b>  | 1.88, m*                                        | 48.2, CH                   | H-15                              | H-2, -9, -14, -15        |
| <b>2</b>  | 1.52, m*<br>1.31, m                             | 26.0, CH <sub>2</sub>      | H-14, -15                         | H-9                      |
| <b>3</b>  | 1.91, m*<br>1.61, m*                            | 37.1, CH <sub>2</sub>      | H-5                               | H-2                      |
| <b>4</b>  | –                                               | 60.7, C                    | –                                 | H-2, -5, -6, -13         |
| <b>5</b>  | 3.02, dd (8.2, 5.9)                             | 57.7, CH                   | H-3, -6, -12                      | H-3, -6, -12             |
| <b>6</b>  | 2.23, m*<br>1.53, m*                            | 25.9, CH <sub>2</sub>      | H-5, -7                           | H-5, -7                  |
| <b>7</b>  | 1.96, m*                                        | 42.1, CH <sub>2</sub>      | H-6                               | H-5, -6, -9              |
| <b>8</b>  | –                                               | 73.3, C                    | –                                 | H-7, -9, -10, -13        |
| <b>9</b>  | 2.22, m*                                        | 49.3, CH                   | H-13, -14                         | H-1, -7, -10             |
| <b>10</b> | 1.68, m*                                        | 36.0, CH <sub>2</sub>      | H-14, -15                         | H-1, -9, -14, -15        |
| <b>11</b> | –                                               | 32.1, C                    | –                                 | H-1, -14, -15            |
| <b>12</b> | 2.02, m*<br>1.79, m*                            | 31.0, CH <sub>2</sub>      | H-5                               | H-13                     |
| <b>13</b> | 2.12, dddd<br>(12.7, 9.2, 7.3, 1.7)<br>1.71, m* | 32.6, CH <sub>2</sub>      | H-9                               | H-7                      |
| <b>14</b> | 0.99, s                                         | 21.6, CH <sub>3</sub>      | H-2, -9, -10, -15                 | H-1, -10, -15            |
| <b>15</b> | 1.00, s                                         | 30.3, CH <sub>3</sub>      | H-1, -2 -10, -14                  | H-14                     |

\* proton signal partly overlaps with other signal; approximate position was assigned by HSQC spectrum

**Table S8.** Comparison of NMR data between synthesized and isolated bridgehead olefin **7**
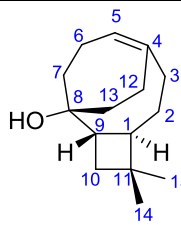

| Position              | this work                  | isolated*                  | this work           | isolated*           |
|-----------------------|----------------------------|----------------------------|---------------------|---------------------|
|                       | $\delta_{\text{H}}$ , type | $\delta_{\text{H}}$ , type | $\delta_{\text{C}}$ | $\delta_{\text{C}}$ |
| <b>1</b>              | 1.64, m <sup>†</sup>       | 1.61, ddd                  | 47.9                | 47.8                |
| <b>2<sup>‡</sup></b>  | 1.58, m <sup>†</sup>       | 1.51, m                    | 26.3                | 26.2                |
|                       | 1.41, m <sup>†</sup>       | 1.37, m                    |                     |                     |
| <b>3</b>              | 2.09, dd                   | 2.08, dd                   | 36.5                | 36.4                |
|                       | 1.77, td                   | 1.76, ddd                  |                     |                     |
| <b>4</b>              | –                          | –                          | 138.2               | 138.1               |
| <b>5</b>              | 5.40, td                   | 5.39, ddd                  | 126.2               | 126.1               |
| <b>6</b>              | 2.41, m <sup>†</sup>       | 2.40, m                    | 23.8                | 23.6                |
|                       | 1.89, m <sup>†</sup>       | 1.90, m                    |                     |                     |
| <b>7</b>              | 2.18, tdd                  | 2.21, ddd                  | 35.5                | 35.4                |
|                       | 1.41, m <sup>†</sup>       | 1.43, m                    |                     |                     |
| <b>8</b>              | –                          | –                          | 75.2                | 75.1                |
| <b>9</b>              | 1.88, m <sup>†</sup>       | 1.89, m                    | 52.1                | 52.0                |
| <b>10<sup>‡</sup></b> | 1.52, m <sup>†</sup>       | 1.54, m                    | 33.6                | 33.5                |
|                       | 1.43, m <sup>†</sup>       | 1.39, m                    |                     |                     |
| <b>11</b>             | –                          | –                          | 33.5                | 33.3                |
| <b>12</b>             | 2.41, m <sup>†</sup>       | 2.41, m                    | 24.7                | 24.5                |
|                       | 1.99, m                    | 1.96, m                    |                     |                     |
| <b>13</b>             | 2.27, m                    | 2.27, ddd                  | 37.7                | 37.6                |
|                       | 1.49, m <sup>†</sup>       | 1.44 <sup>§</sup>          |                     |                     |
| <b>14/15</b>          | 0.98, s                    | 0.98, s                    | 30.1, 22.0          | 30.0, 21.8          |

\* from *Euphorbia wangii* (*Phytochemistry* **1997**, 45 (2), 343); † proton signal partly overlaps with other signal; approximate position was assigned by HSQC spectrum; ‡ <sup>13</sup>C signals were given vice versa in isolation paper (*Phytochemistry* **1997**, 45 (2), 343), assignment was corrected here; § multiplicity not reported

**Table S9.** Comparison of  $^{13}\text{C}$  NMR chemical shifts ( $\text{CDCl}_3$ ) of euphoranin E and synthetic epoxyalcohol **2**

|                                                                         |          |          |          |          |          |          |           |      |           |           |          |              |          |           |      |          |              |
|-------------------------------------------------------------------------|----------|----------|----------|----------|----------|----------|-----------|------|-----------|-----------|----------|--------------|----------|-----------|------|----------|--------------|
| Euphoranin E<br>(isolated)*<br>(101 MHz)                                | 74.6     | 64.7     | 59.2     | 50.3     | 45.6     |          | 34.7      | 34.1 | 33.6      | 33.4      |          | 29.9         | 26.6     | 25.7      | 25.7 | 24.2     | 21.3         |
| Epoxyalcohol <b>2</b><br>(synthesized)†<br>(50 MHz)                     | 74.7     | 64.8     | 59.2     | 50.4     | 45.8     | 36.1     | 34.8      |      | 33.6      | 33.5      | 31.8     | 30.0         | 26.7     | 25.8      |      | 24.3     | 21.4         |
| Epoxyalcohol <b>2</b><br>(synthesized)<br>(101 MHz)<br><i>This work</i> | 74.8     | 64.9     | 59.4     | 50.5     | 45.8     | 36.1     | 34.9      |      | 33.7      | 33.5      | 31.9     | 30.1         | 26.8     | 25.8      |      | 24.3     | 21.5         |
| <b>Position</b>                                                         | <b>8</b> | <b>5</b> | <b>4</b> | <b>9</b> | <b>1</b> | <b>3</b> | <b>12</b> |      | <b>11</b> | <b>10</b> | <b>7</b> | <b>14/15</b> | <b>6</b> | <b>13</b> |      | <b>2</b> | <b>14/15</b> |

Green cells indicate deviation  $\leq 0.2$  ppm comparing to our product, red cells indicate presence/absence of  $^{13}\text{C}$  signals comparing with isolated material

\* from *Euphorbia wangii* (*Ind. J. Chem.* **1996**, 35B, 1308)

† *Agric. Biol. Chem.* **1989**, 53 (11), 3011; the assignment of  $^{13}\text{C}$  signals was corrected

**Table S10.** Comparison of characteristic  $^1\text{H}$  NMR signals of euphoranin E and synthetic epoxyalcohol **2** in  $\text{CDCl}_3$  or  $\text{C}_6\text{D}_6$  solutions

| <b>Position</b>                                                         | <b>H-5</b>                                 |                                        | <b>H-14 or H-15</b>                       |                                        | <b>H-14 or H-15</b>                       |                                        |
|-------------------------------------------------------------------------|--------------------------------------------|----------------------------------------|-------------------------------------------|----------------------------------------|-------------------------------------------|----------------------------------------|
| Euphoranin E (isolated)*<br>(400 MHz)                                   | 2.41, m<br>(reported in $\text{CDCl}_3$ )  |                                        | 0.91, s<br>(reported in $\text{CDCl}_3$ ) |                                        | 0.88, s<br>(reported in $\text{CDCl}_3$ ) |                                        |
| Epoxyalcohol <b>2</b><br>(synthesized)†<br>(200 MHz)                    | 2.76, dd<br>(reported in $\text{CDCl}_3$ ) |                                        | 1.03, s<br>(reported in $\text{CDCl}_3$ ) |                                        | 1.03, s<br>(reported in $\text{CDCl}_3$ ) |                                        |
| Epoxyalcohol <b>2</b><br>(synthesized)<br>(400 MHz)<br><i>This work</i> | 2.76, dd<br>( $\text{CDCl}_3$ )            | 2.43, dd<br>( $\text{C}_6\text{D}_6$ ) | 1.02, s<br>( $\text{CDCl}_3$ )            | 0.92, s<br>( $\text{C}_6\text{D}_6$ ), | 1.02, s<br>( $\text{CDCl}_3$ )            | 0.89, s<br>( $\text{C}_6\text{D}_6$ ), |

\* from *Euphorbia wangii* (*Ind. J. Chem.* **1996**, 35B, 1308)

† *Agric. Biol. Chem.* **1989**, 53 (11), 3011

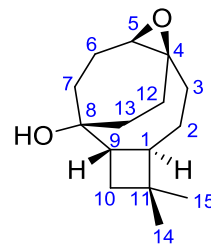

**Table S11.** Comparison of  $^{13}\text{C}$  NMR chemical shifts ( $\text{CDCl}_3$ ) of euphoranin E and synthetic epoxyalcohol **11**

|                                                                          |          |          |          |          |          |          |          |           |           |           |           |           |          |          |           |
|--------------------------------------------------------------------------|----------|----------|----------|----------|----------|----------|----------|-----------|-----------|-----------|-----------|-----------|----------|----------|-----------|
| Euphoranin E<br>(isolated)*<br>(101 MHz)                                 | 74.6     | 64.7     | 59.2     | 50.3     | 45.6     | 34.7     | 34.1     | 33.6      | 33.4      | 29.9      | 26.6      | 25.7      | 25.7     | 24.2     | 21.3      |
| Epoxyalcohol <b>11</b><br>(synthesized)<br>(101 MHz)<br><i>This work</i> | 73.3     | 60.7     | 57.7     | 49.3     | 48.2     | 42.1     | 37.1     | 36.0      | 32.6      | 32.1      | 31.0      | 30.3      | 26.0     | 25.9     | 21.6      |
| <b>Position</b>                                                          | <b>8</b> | <b>4</b> | <b>5</b> | <b>9</b> | <b>1</b> | <b>7</b> | <b>3</b> | <b>10</b> | <b>13</b> | <b>11</b> | <b>12</b> | <b>15</b> | <b>2</b> | <b>6</b> | <b>14</b> |

\* from *Euphorbia wangii* (*Ind. J. Chem.* **1996**, 35B, 1308)**Table S12.** Comparison of characteristic  $^1\text{H}$  NMR ( $\text{CDCl}_3$ ) signals of euphoranin E and synthetic epoxyalcohol **11**

| <b>Position</b>                                                        | <b>H-5</b> | <b>H-14</b> | <b>H-15</b> |
|------------------------------------------------------------------------|------------|-------------|-------------|
| Euphoranin E (isolated)*<br>(400 MHz)                                  | 2.41, m    | 0.91, s     | 0.88, s     |
| Epoxyalcohol <b>11</b><br>(synthetic)<br>(400 MHz)<br><i>This work</i> | 3.02, dd   | 0.99, s     | 1.00, s     |

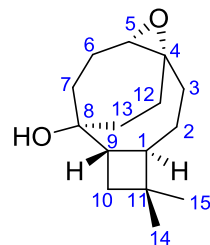\* from *Euphorbia wangii* (*Ind. J. Chem.* **1996**, 35B, 1308)

## NMR spectra of synthesized compounds

### S1. NMR of (1*S*,5*R*,9*R*)-10,10-dimethyl-2,6-dimethylenebicyclo[7.2.0]undecan-5-ol (**6**)

<sup>1</sup>H NMR (400 MHz, CDCl<sub>3</sub>) of (1*S*,5*R*,9*R*)-10,10-dimethyl-2,6-dimethylenebicyclo[7.2.0]undecan-5-ol (**6**)

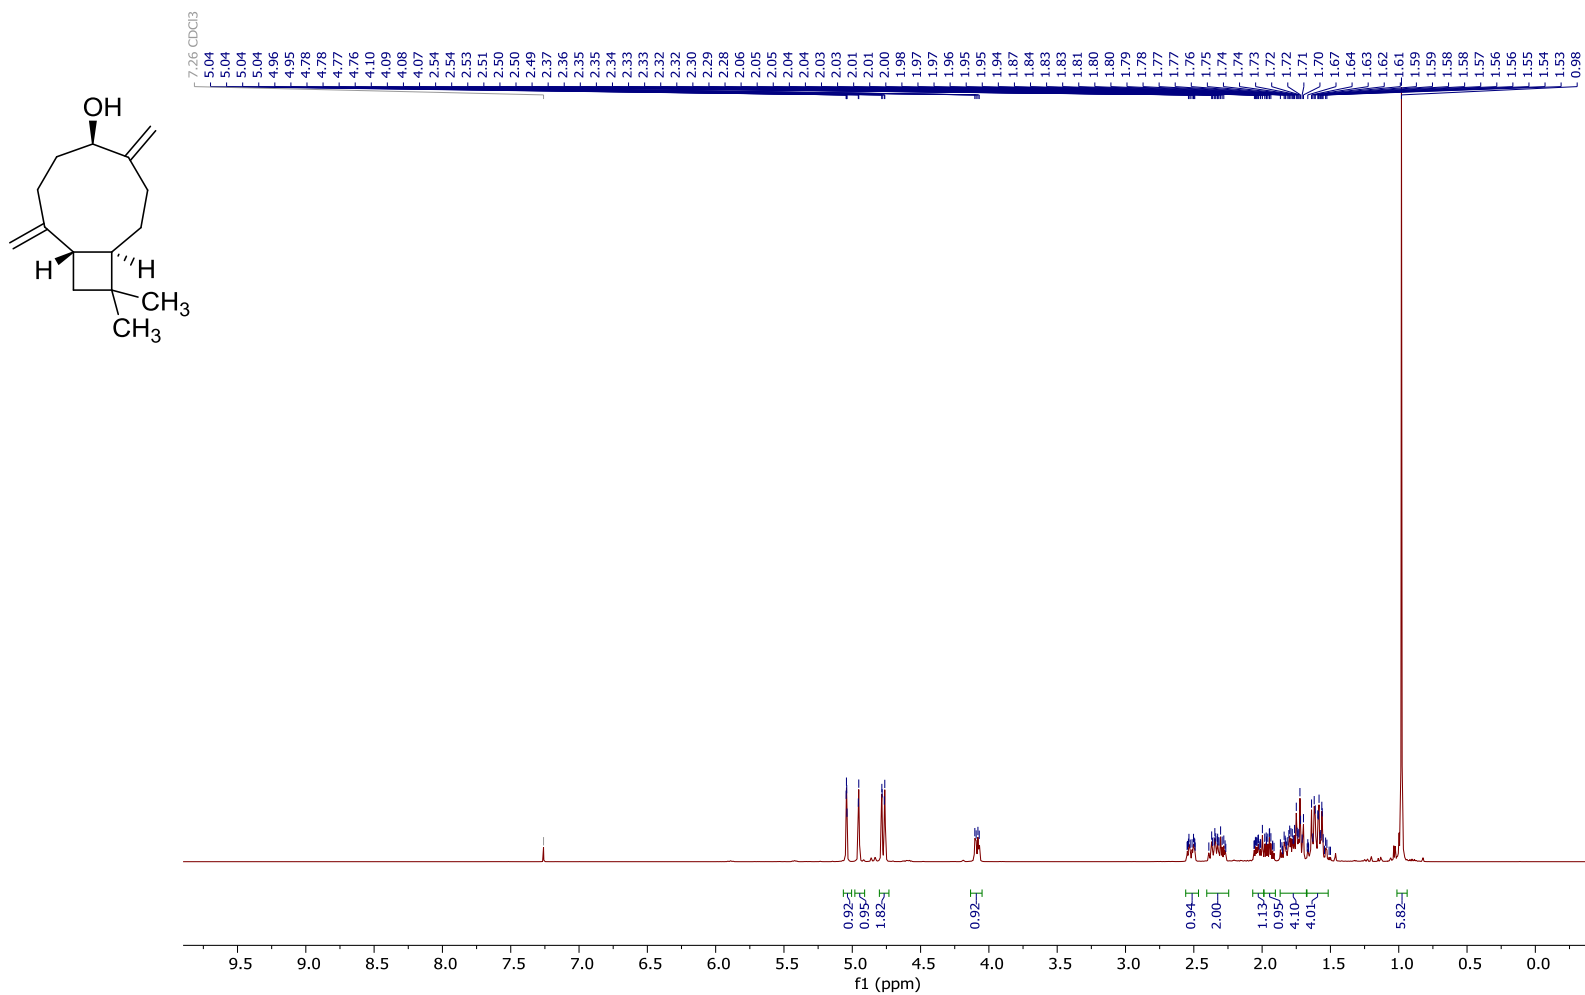

$^{13}\text{C}$  NMR (101 MHz,  $\text{CDCl}_3$ ) of (1*S*,5*R*,9*R*)-10,10-dimethyl-2,6-dimethylenebicyclo[7.2.0]undecan-5-ol (**6**)

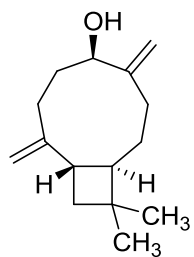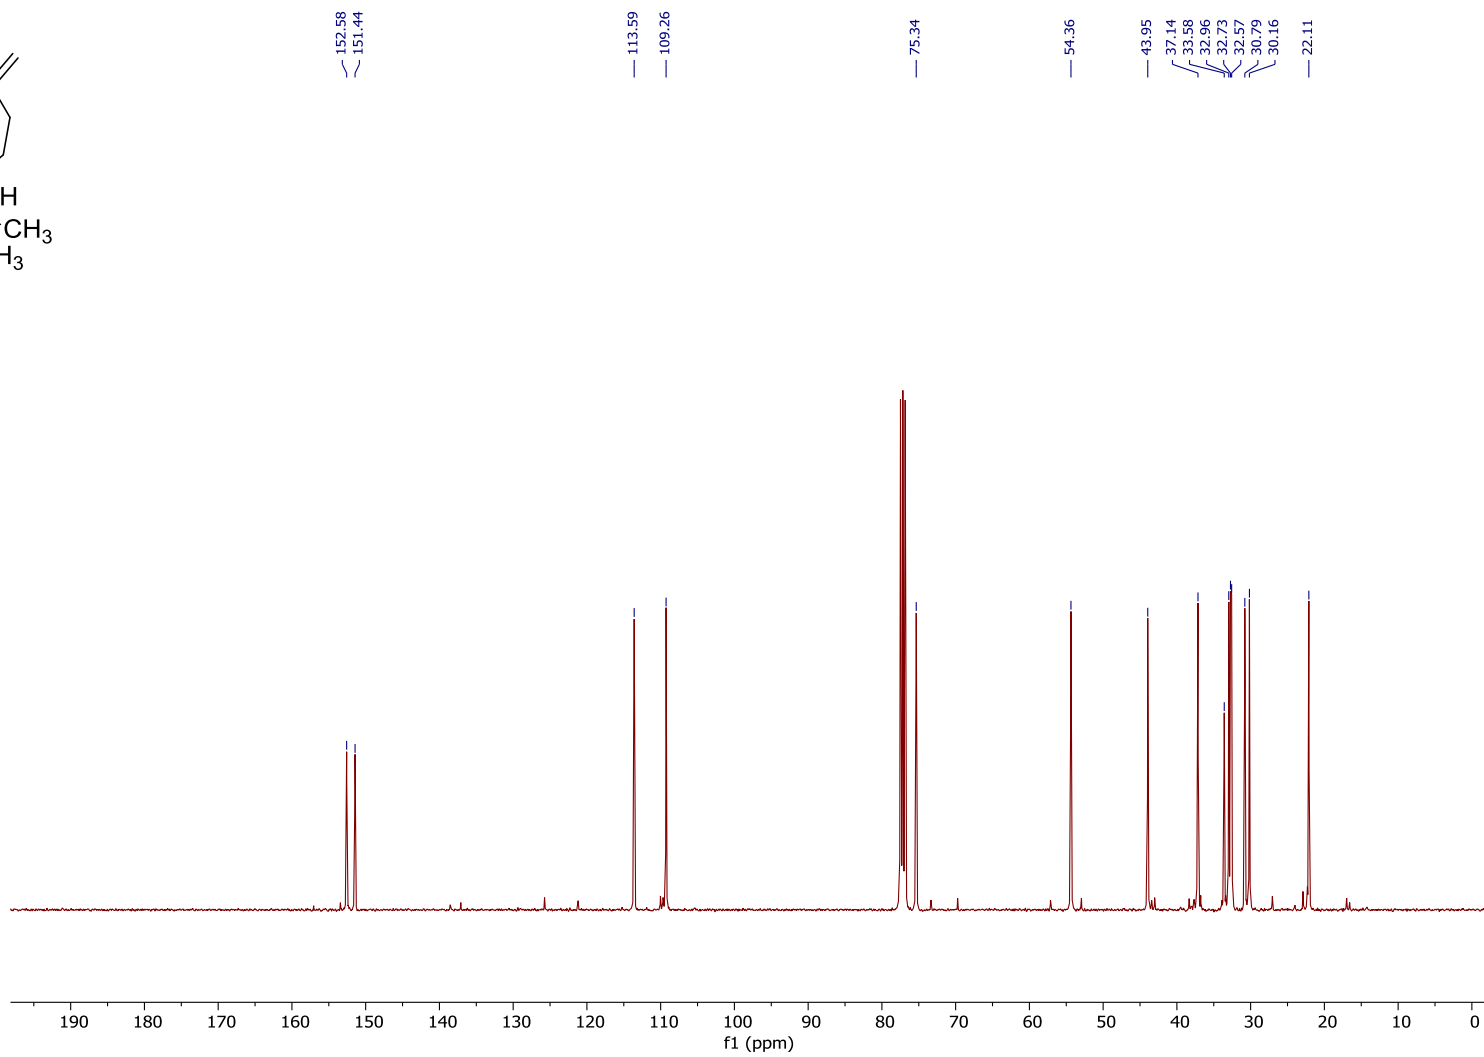

S2. NMR of (1*S*,9*R*)-10,10-dimethyl-2,6-dimethylenebicyclo[7.2.0]undecan-5-one (**8**)

<sup>1</sup>H NMR (400 MHz, CDCl<sub>3</sub>) of (1*S*,5*R*,9*R*)-10,10-dimethyl-2,6-dimethylenebicyclo[7.2.0]undecan-5-one (**8**)

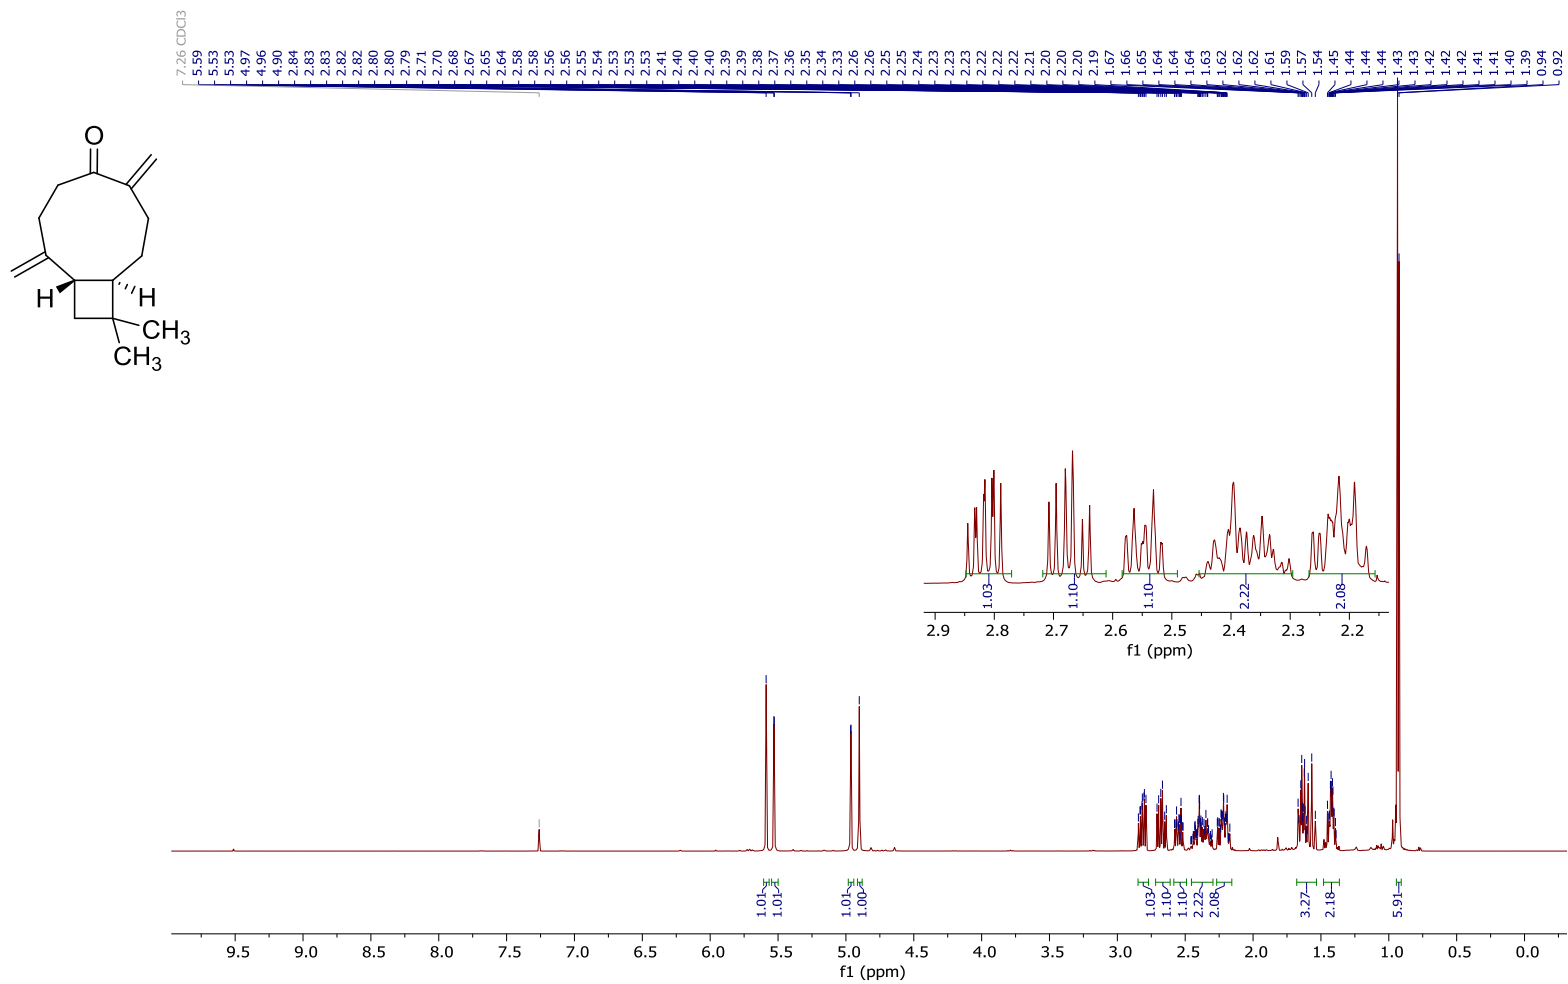



$^{13}\text{C}$  NMR (101 MHz,  $\text{CDCl}_3$ ) of (1*S*,9*R*)-10,10-dimethyl-2,6-dimethylenebicyclo[7.2.0]undecan-5-one (**8**)

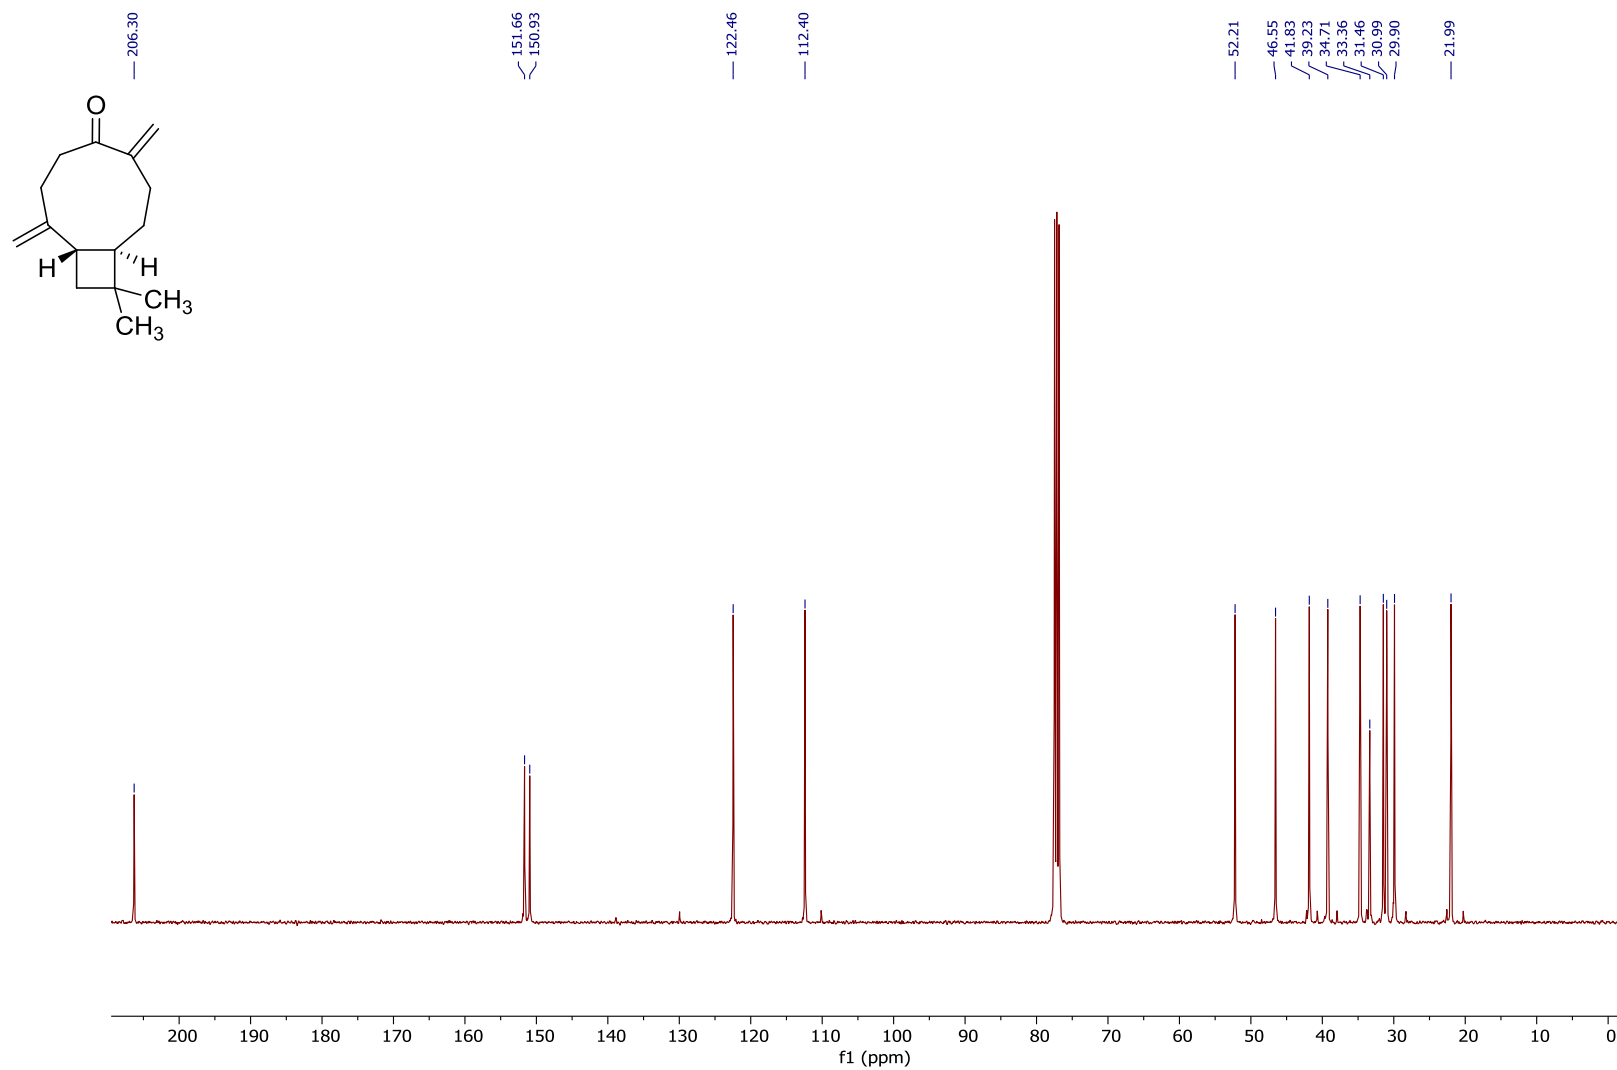

COSY of (1*S*,9*R*)-10,10-dimethyl-2,6-dimethylenebicyclo[7.2.0]undecan-5-one (**8**)

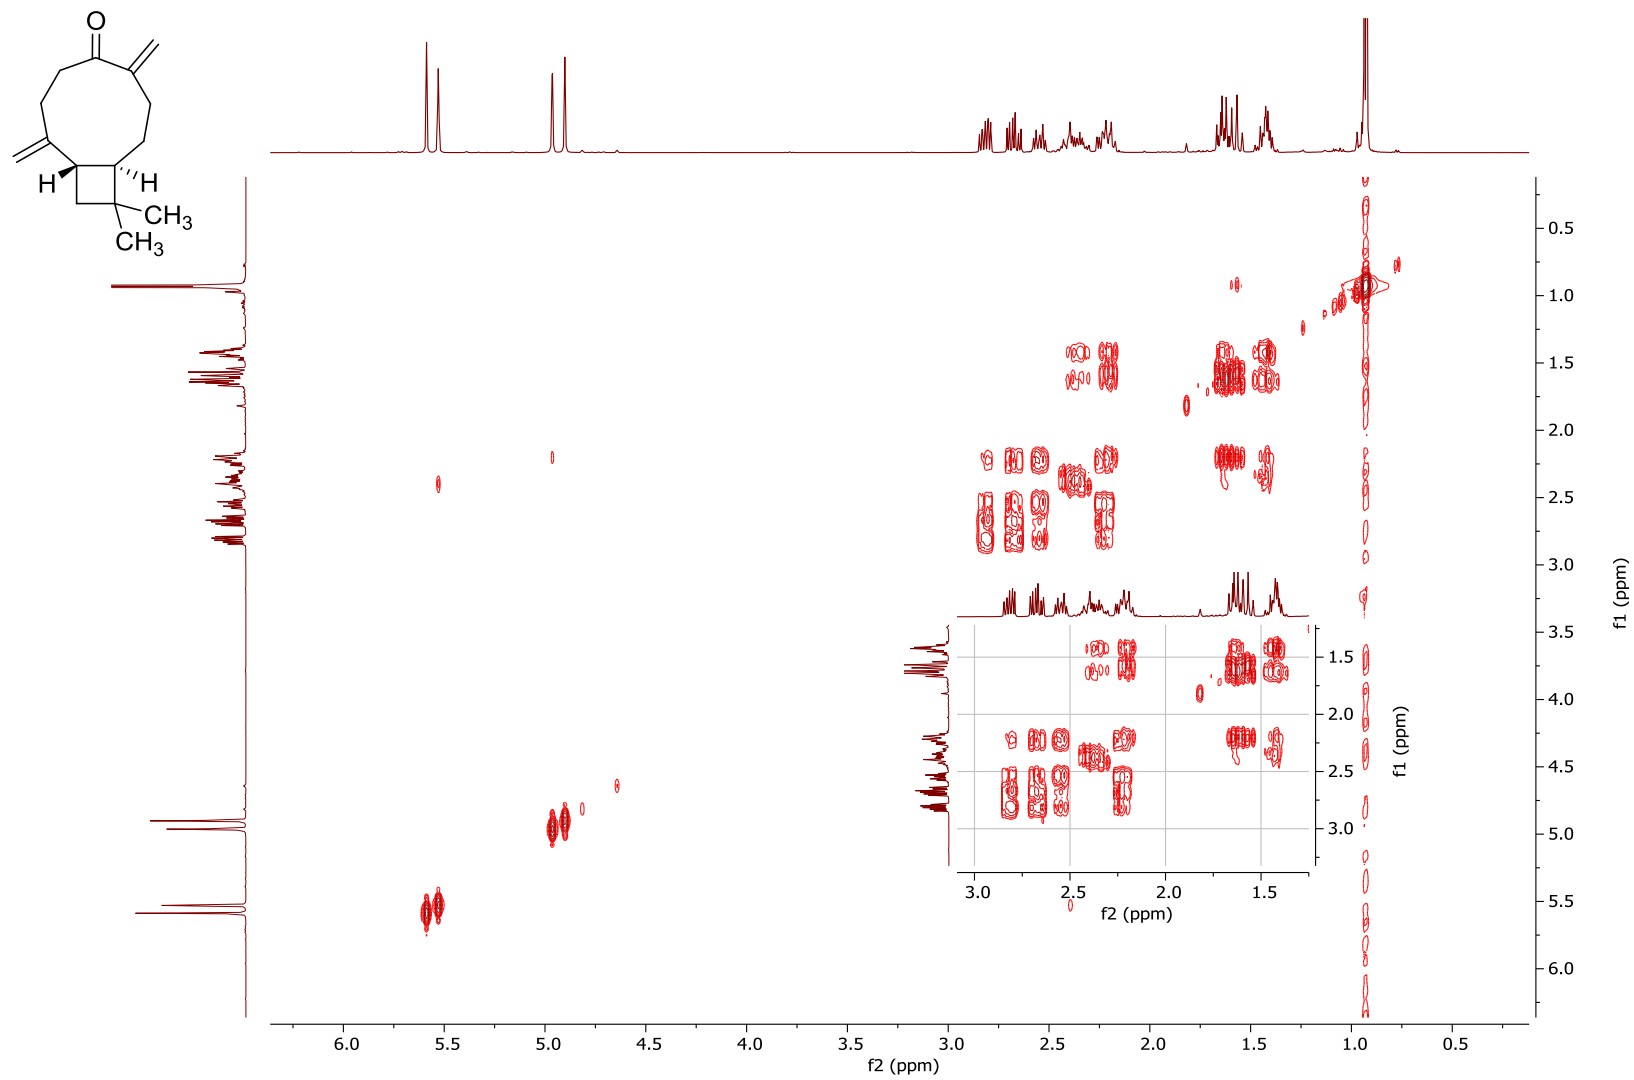

HSQC of (1*S*,9*R*)-10,10-dimethyl-2,6-dimethylenebicyclo[7.2.0]undecan-5-one (**8**)

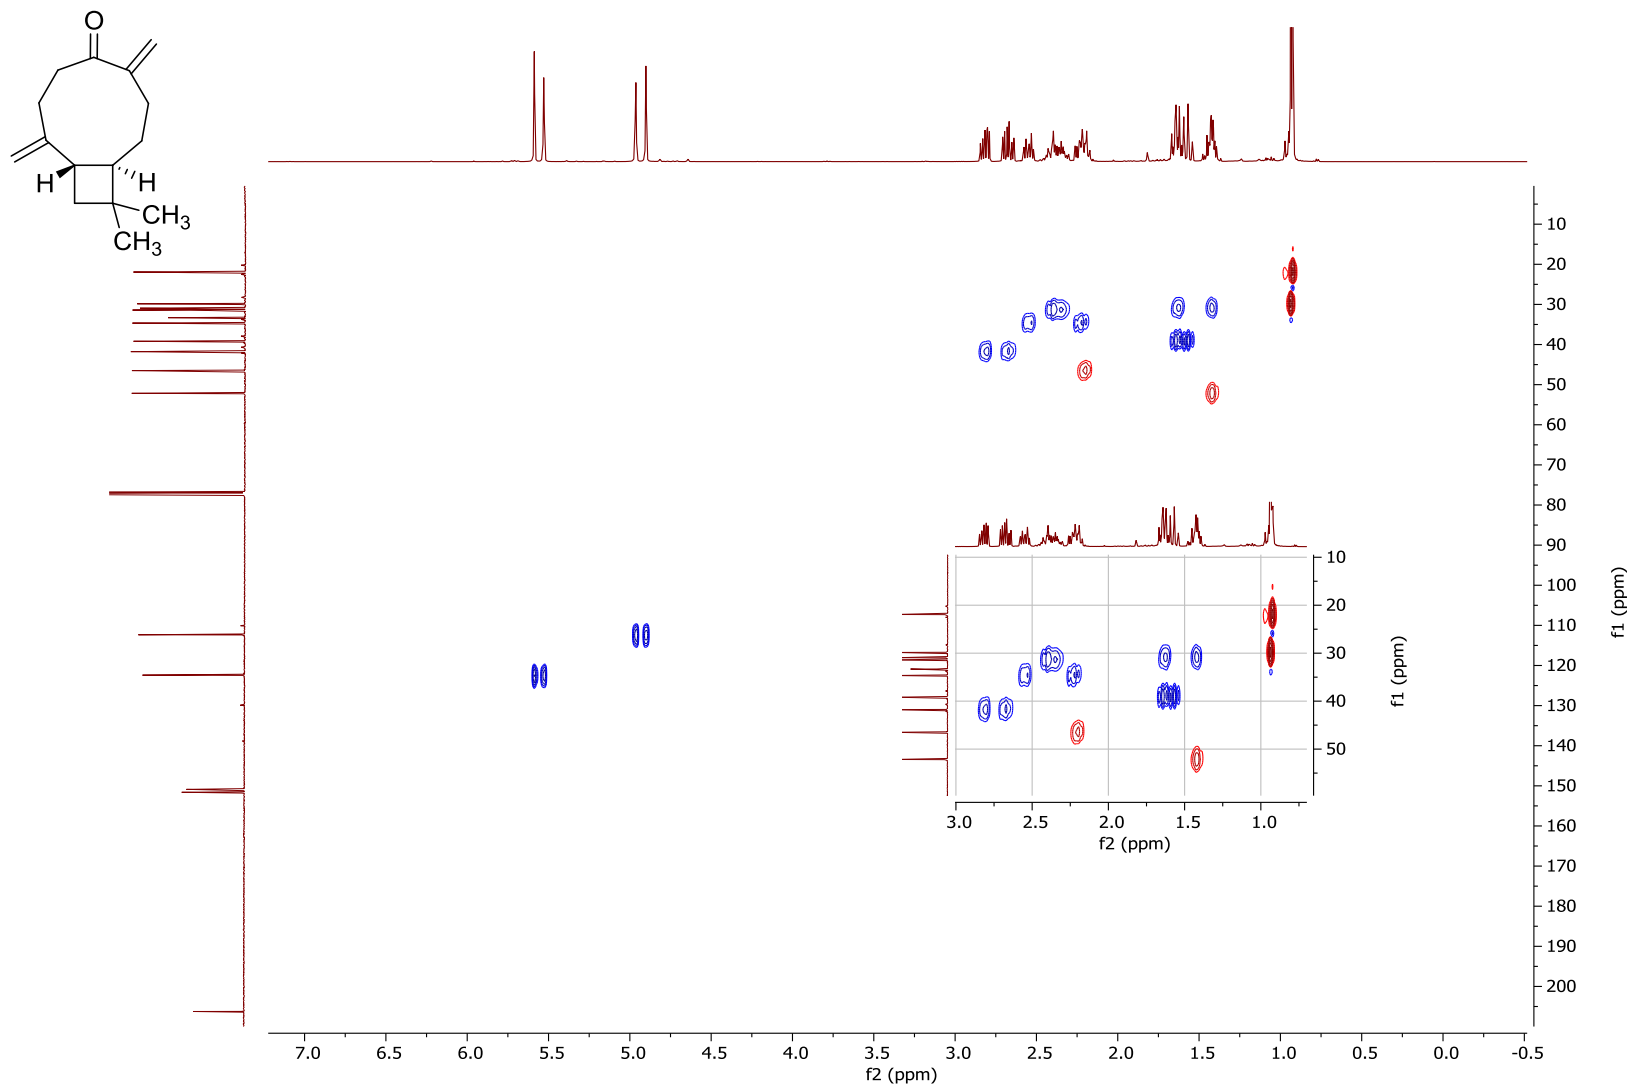

HMBC of (1*S*,9*R*)-10,10-dimethyl-2,6-dimethylenebicyclo[7.2.0]undecan-5-one (**8**)

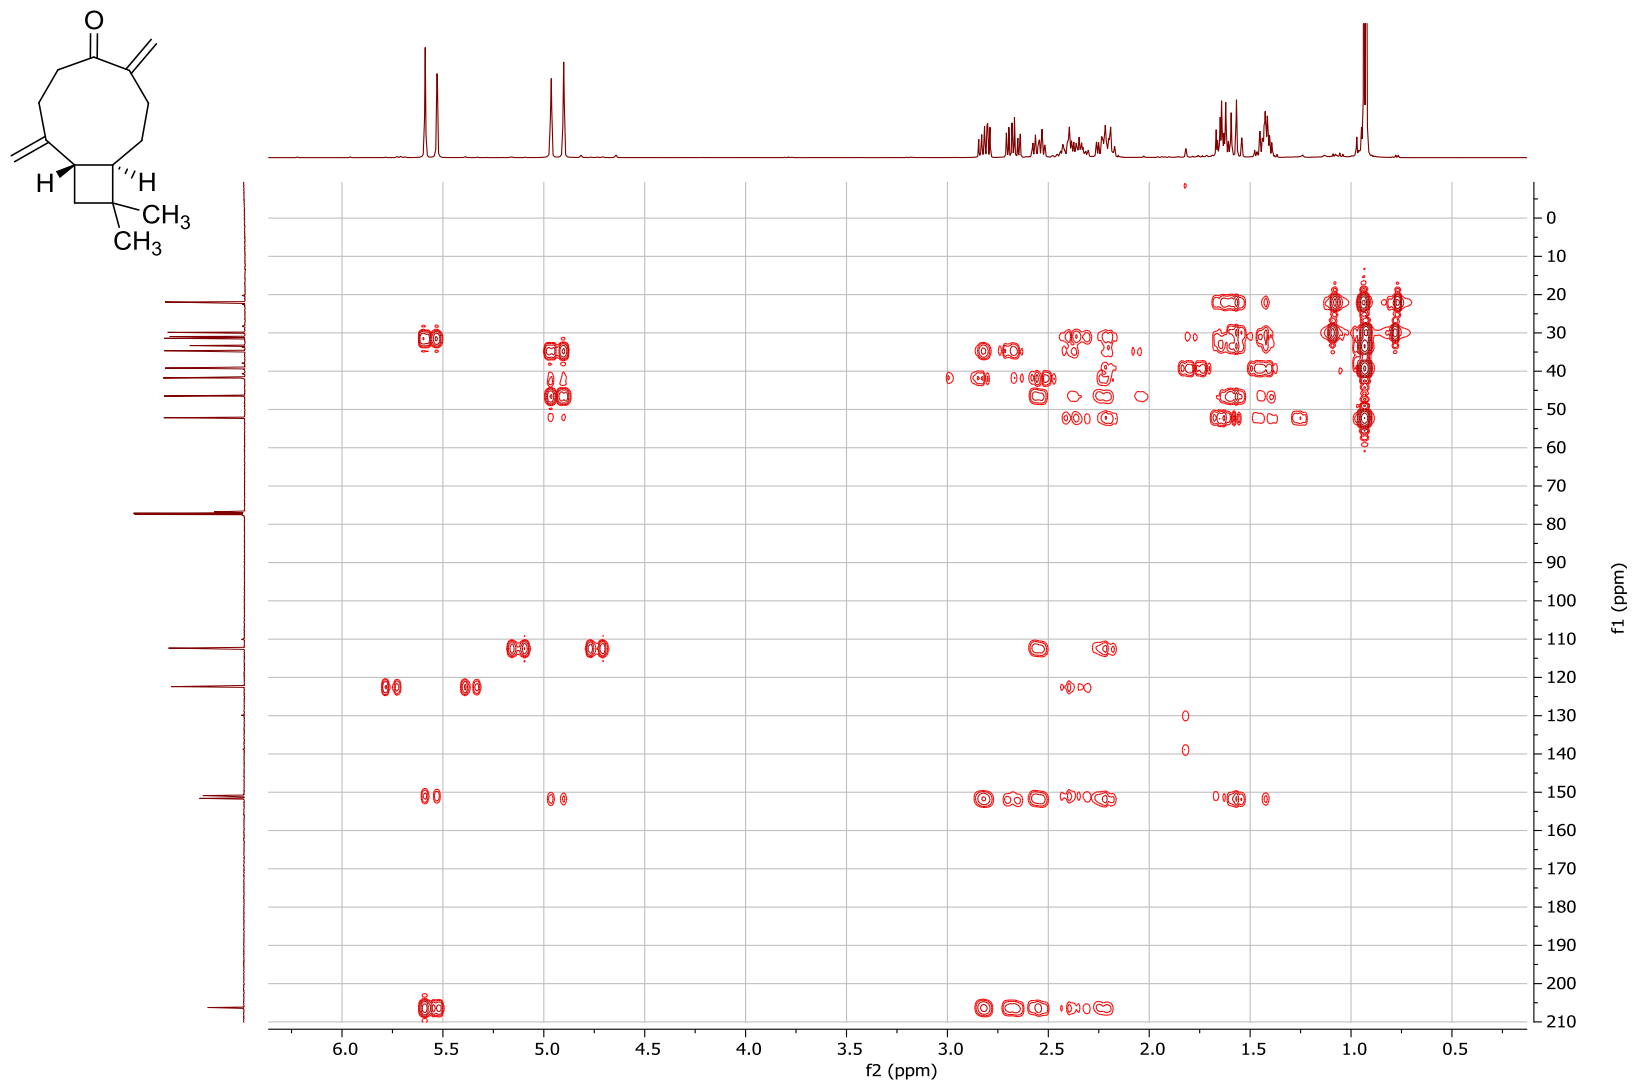

S3. NMR of (2a*R*,4a*R*,7a*R*,7b*S*)-2,2-dimethyloctahydro-5*H*-4a,7a-ethanocyclobuta[*e*]inden-5-one (**12**)

<sup>1</sup>H NMR (400 MHz, CDCl<sub>3</sub>) of (2a*R*,4a*R*,7a*R*,7b*S*)-2,2-dimethyloctahydro-5*H*-4a,7a-ethanocyclobuta[*e*]inden-5-one (**12**)

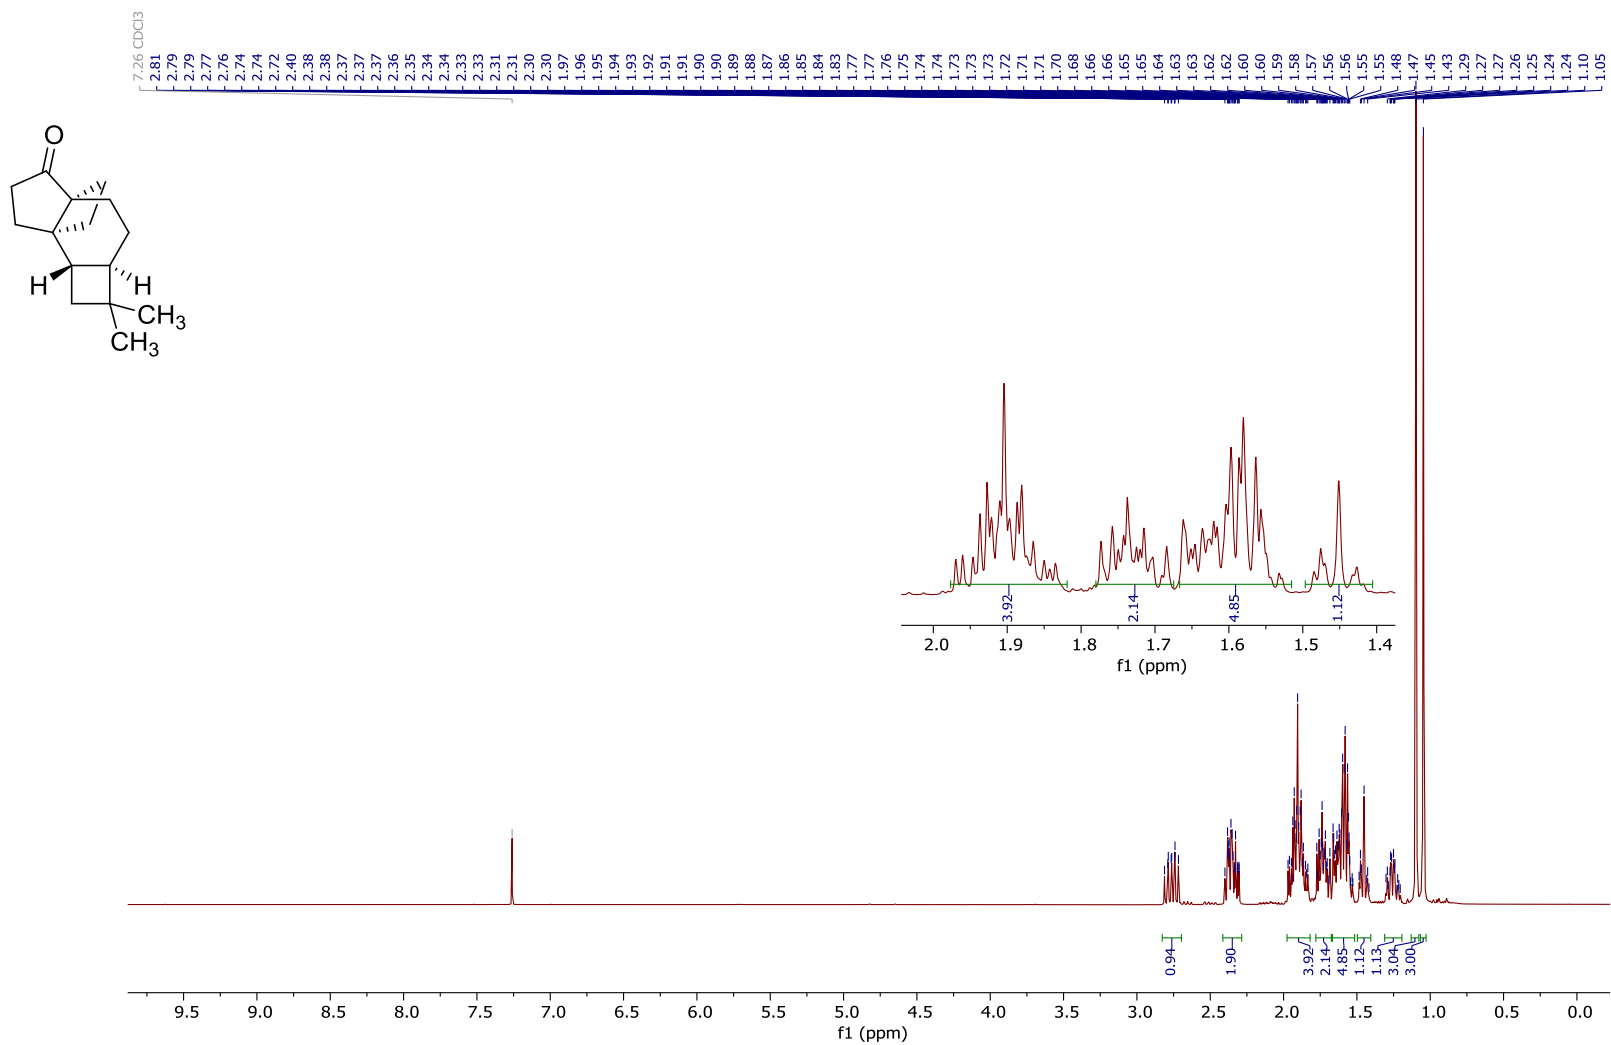

$^{13}\text{C}$  NMR (101 MHz,  $\text{CDCl}_3$ ) of (2a*R*,4a*R*,7a*R*,7b*S*)-2,2-dimethyloctahydro-5*H*-4a,7a-ethanocyclobuta[*e*]inden-5-one (**12**)

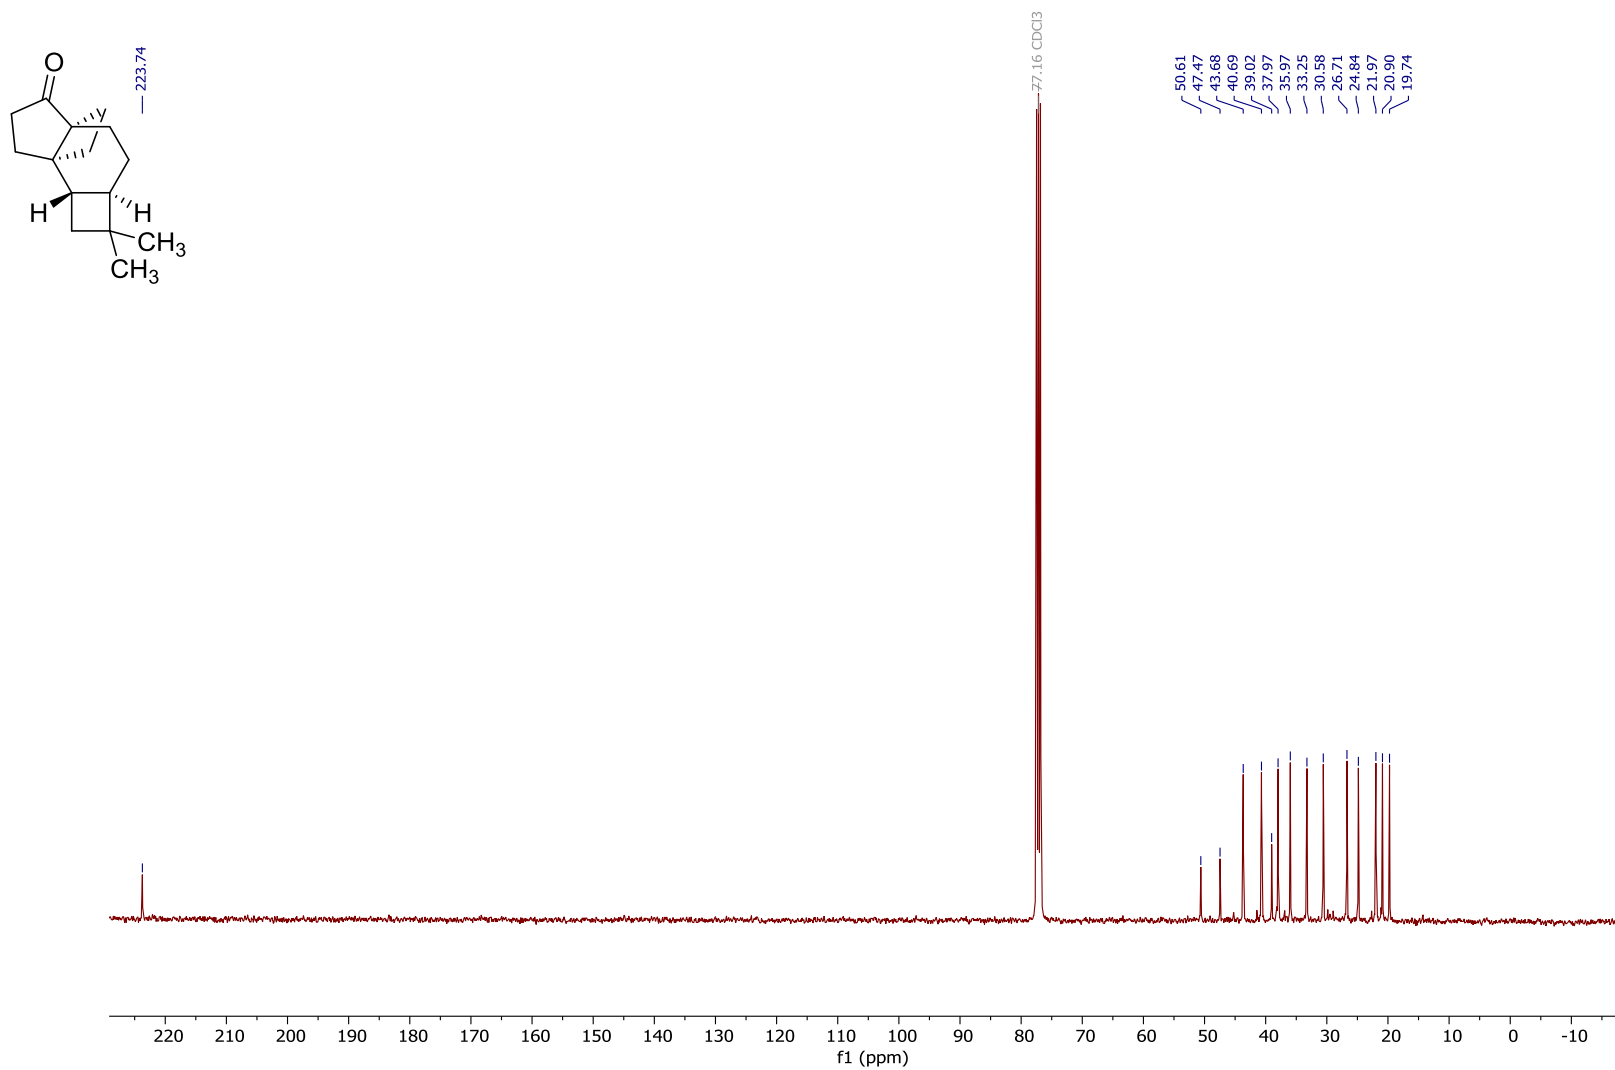

COSY of (2a*R*,4a*R*,7a*R*,7b*S*)-2,2-dimethyloctahydro-5*H*-4a,7a-ethanocyclobuta[*e*]inden-5-one (**12**)

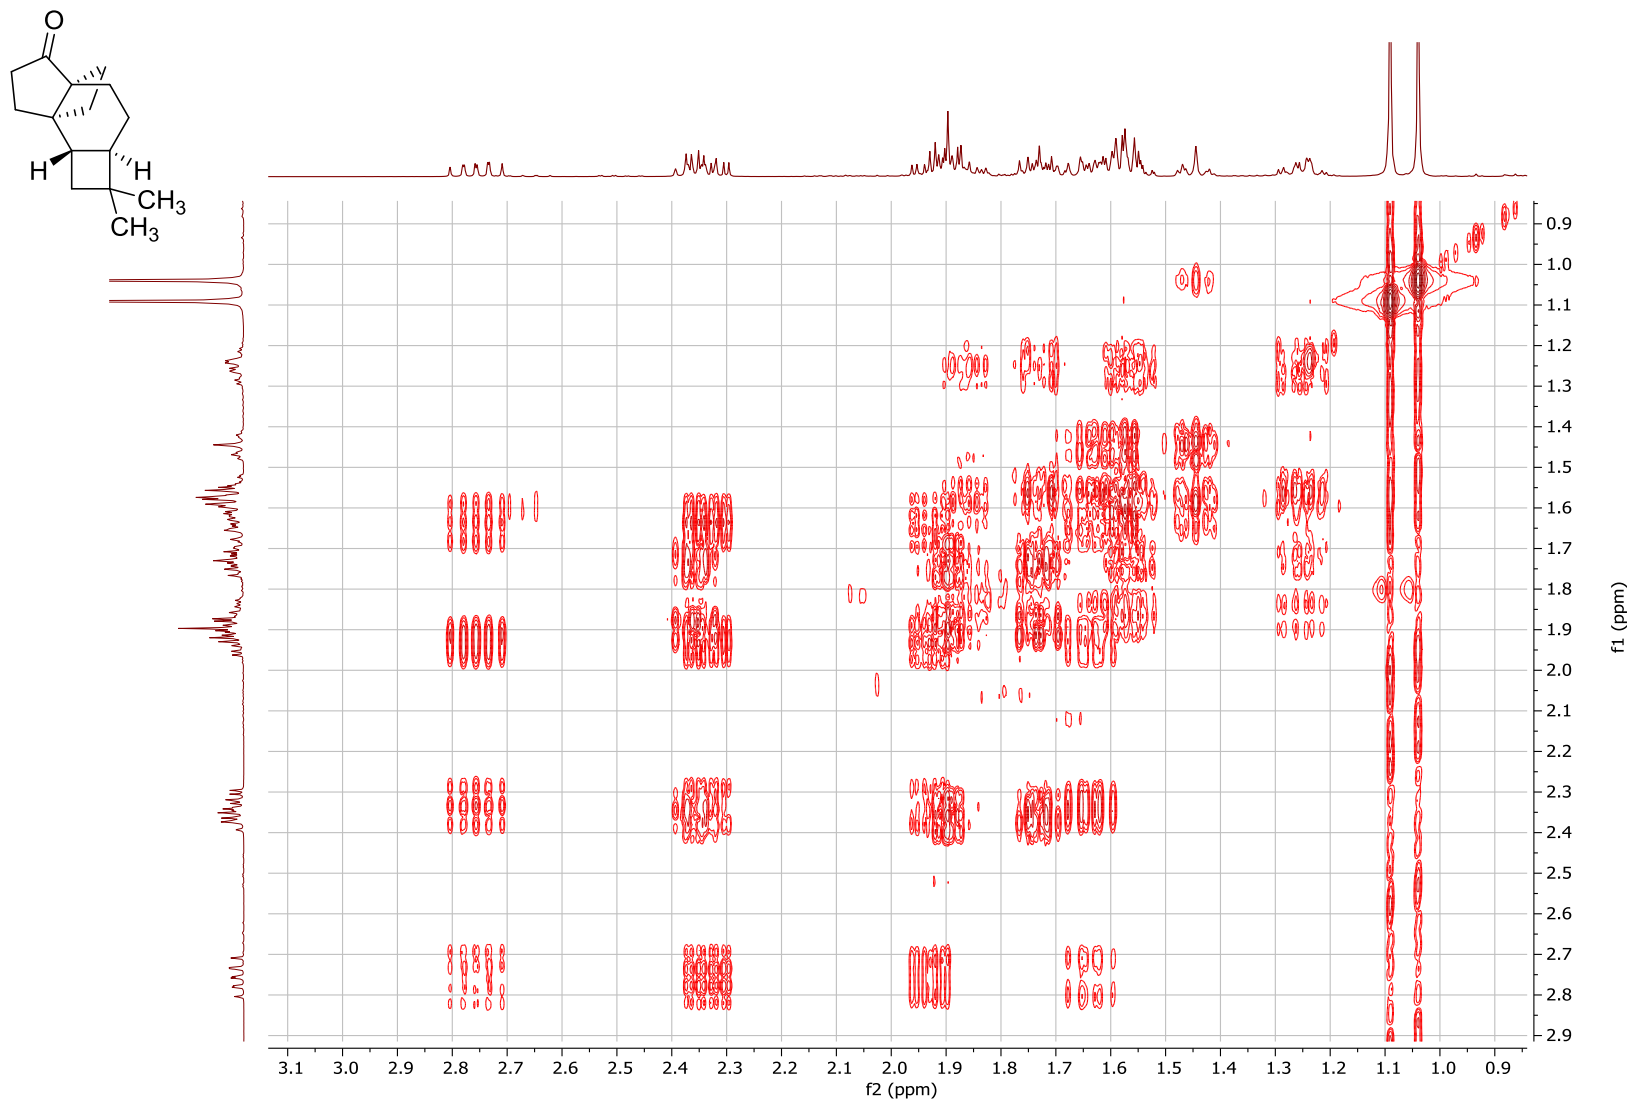

NOESY of (2aR,4aR,7aR,7bS)-2,2-dimethyloctahydro-5H-4a,7a-ethanocyclobuta[e]inden-5-one (**12**)

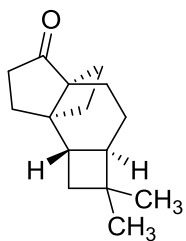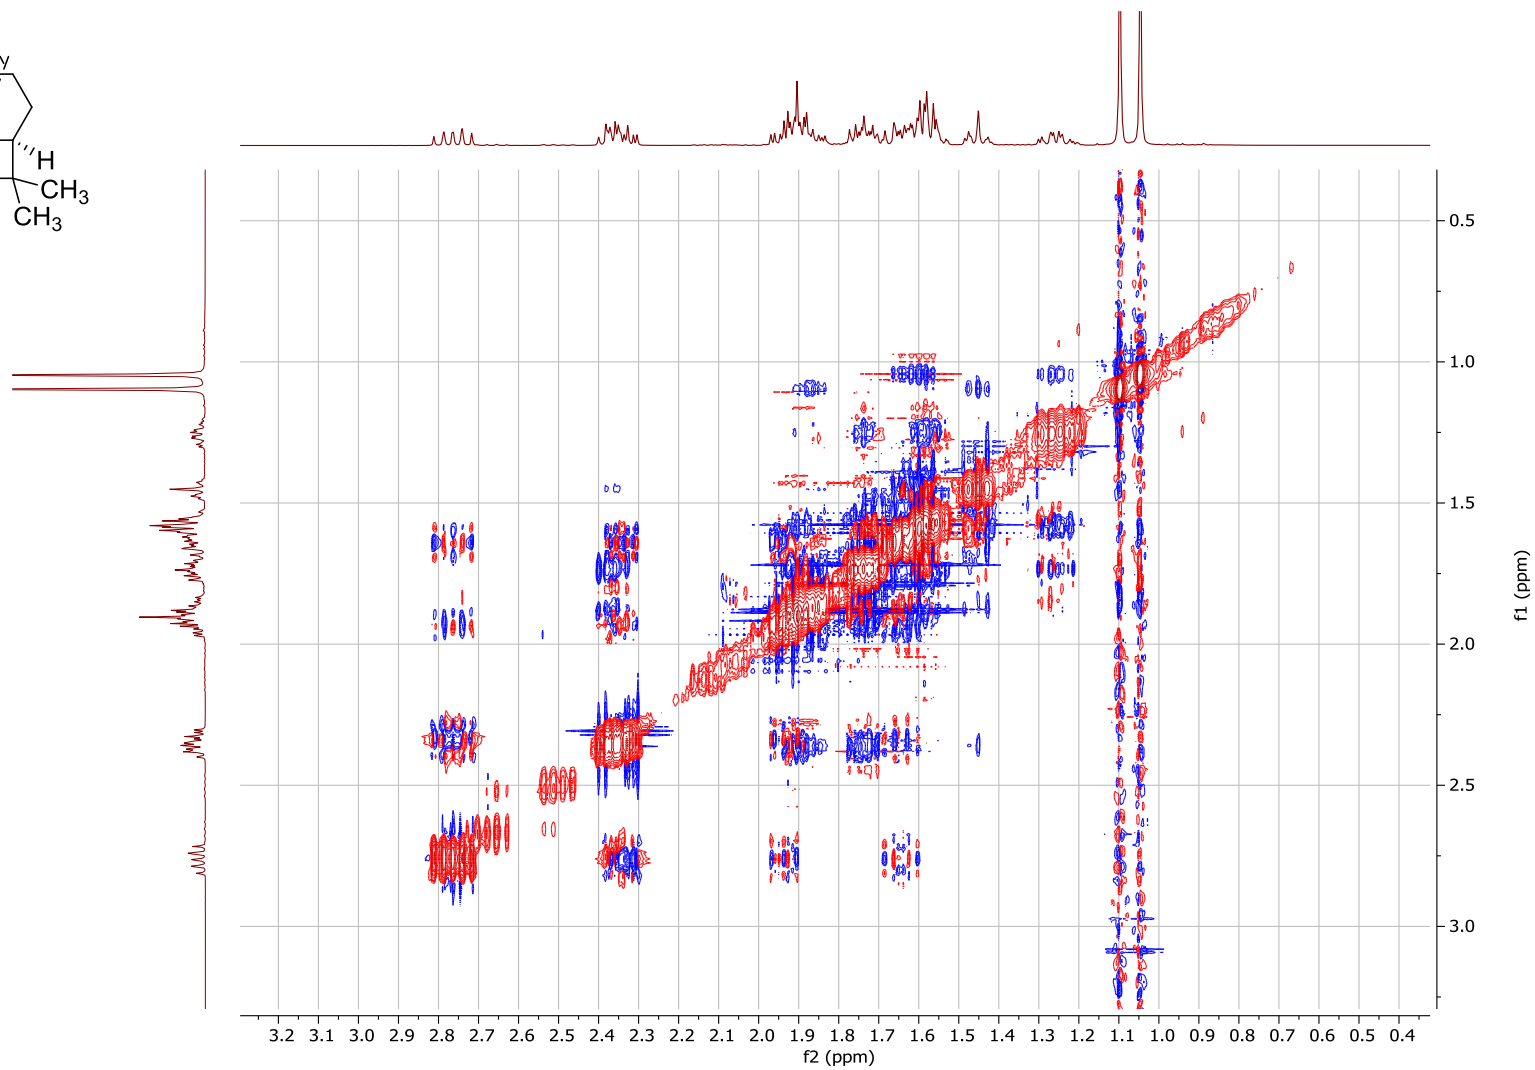



HSQC of (2a*R*,4a*R*,7a*R*,7b*S*)-2,2-dimethyloctahydro-5*H*-4a,7a-ethanocyclobuta[*e*]inden-5-one (**12**)

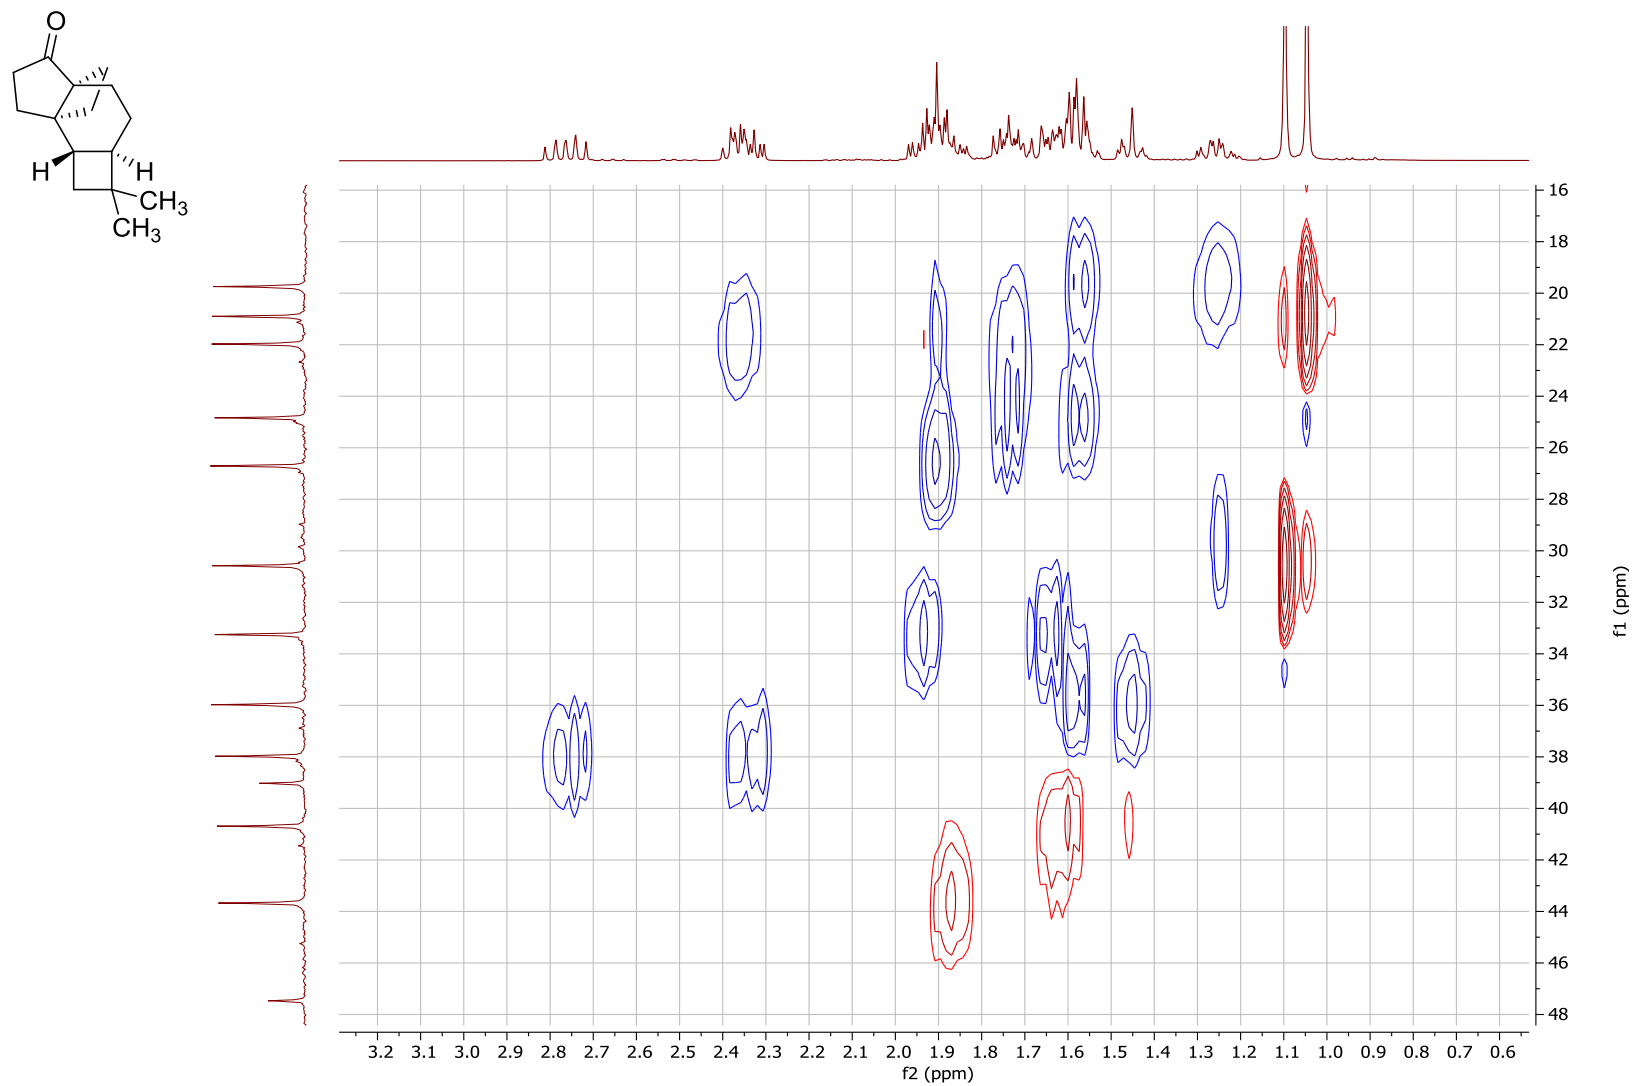

HMBC of (2a*R*,4a*R*,7a*R*,7b*S*)-2,2-dimethyloctahydro-5*H*-4a,7a-ethanocyclobuta[*e*]inden-5-one (**12**)

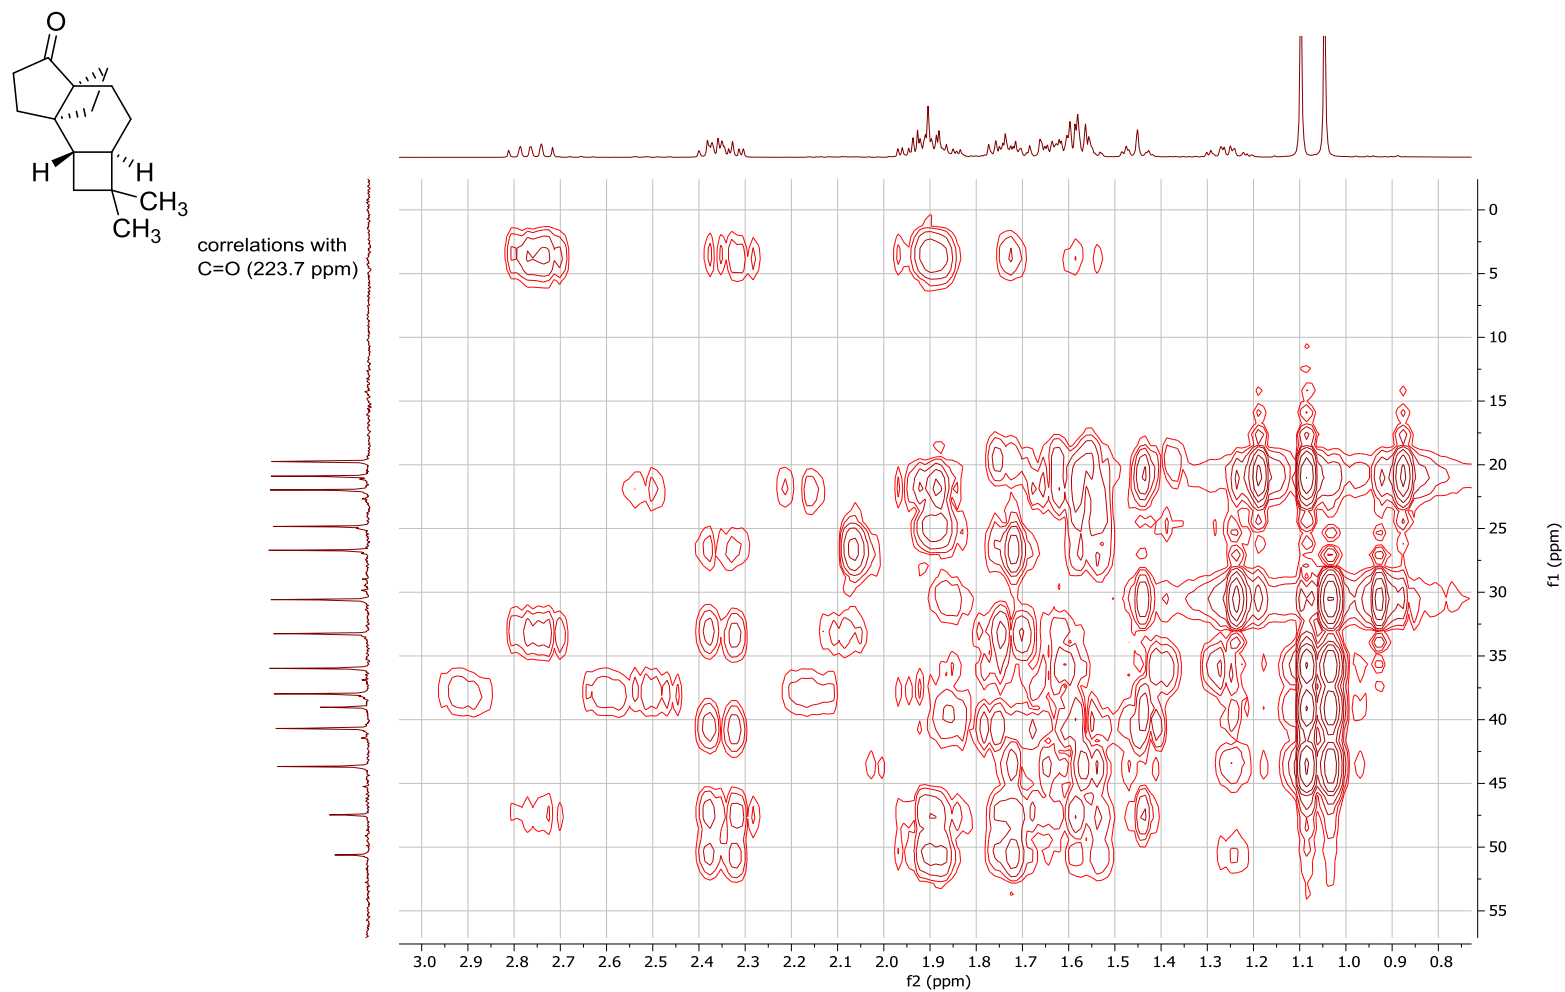

Due to the location of carbonyl carbon in strong downfield region (223.7 ppm), its HMBC correlations with protons are out of margins and appear in the upper side of the spectrum.

S4. NMR of (2aR,4aR,5S,7aR,7bS)-2,2-dimethyloctahydro-5H-4a,7a-ethanocyclobuta[e]inden-5-ol (9)

<sup>1</sup>H NMR (400 MHz, CDCl<sub>3</sub>) of (2aR,4aR,5S,7aR,7bS)-2,2-dimethyloctahydro-5H-4a,7a-ethanocyclobuta[e]inden-5-ol (9)

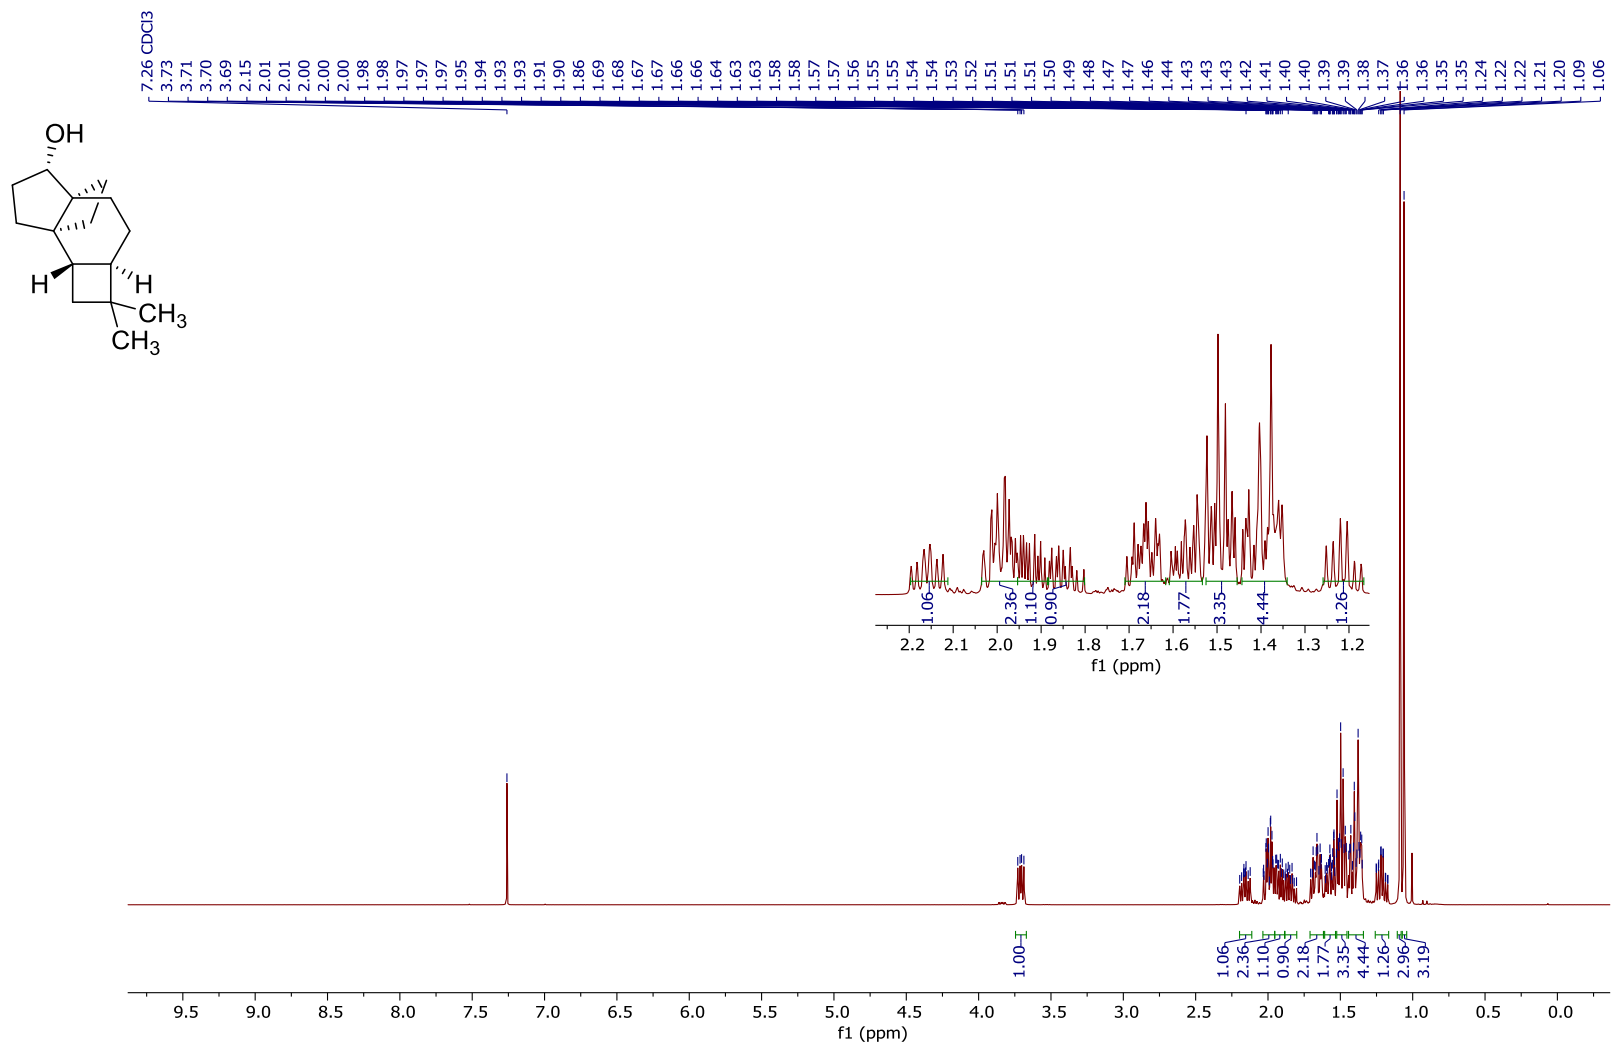

$^{13}\text{C}$  NMR (101 MHz,  $\text{CDCl}_3$ ) of (2a*R*,4a*R*,5*S*,7a*R*,7b*S*)-2,2-dimethyloctahydro-5*H*-4a,7a-ethanocyclobuta[*e*]inden-5-ol (**9**)

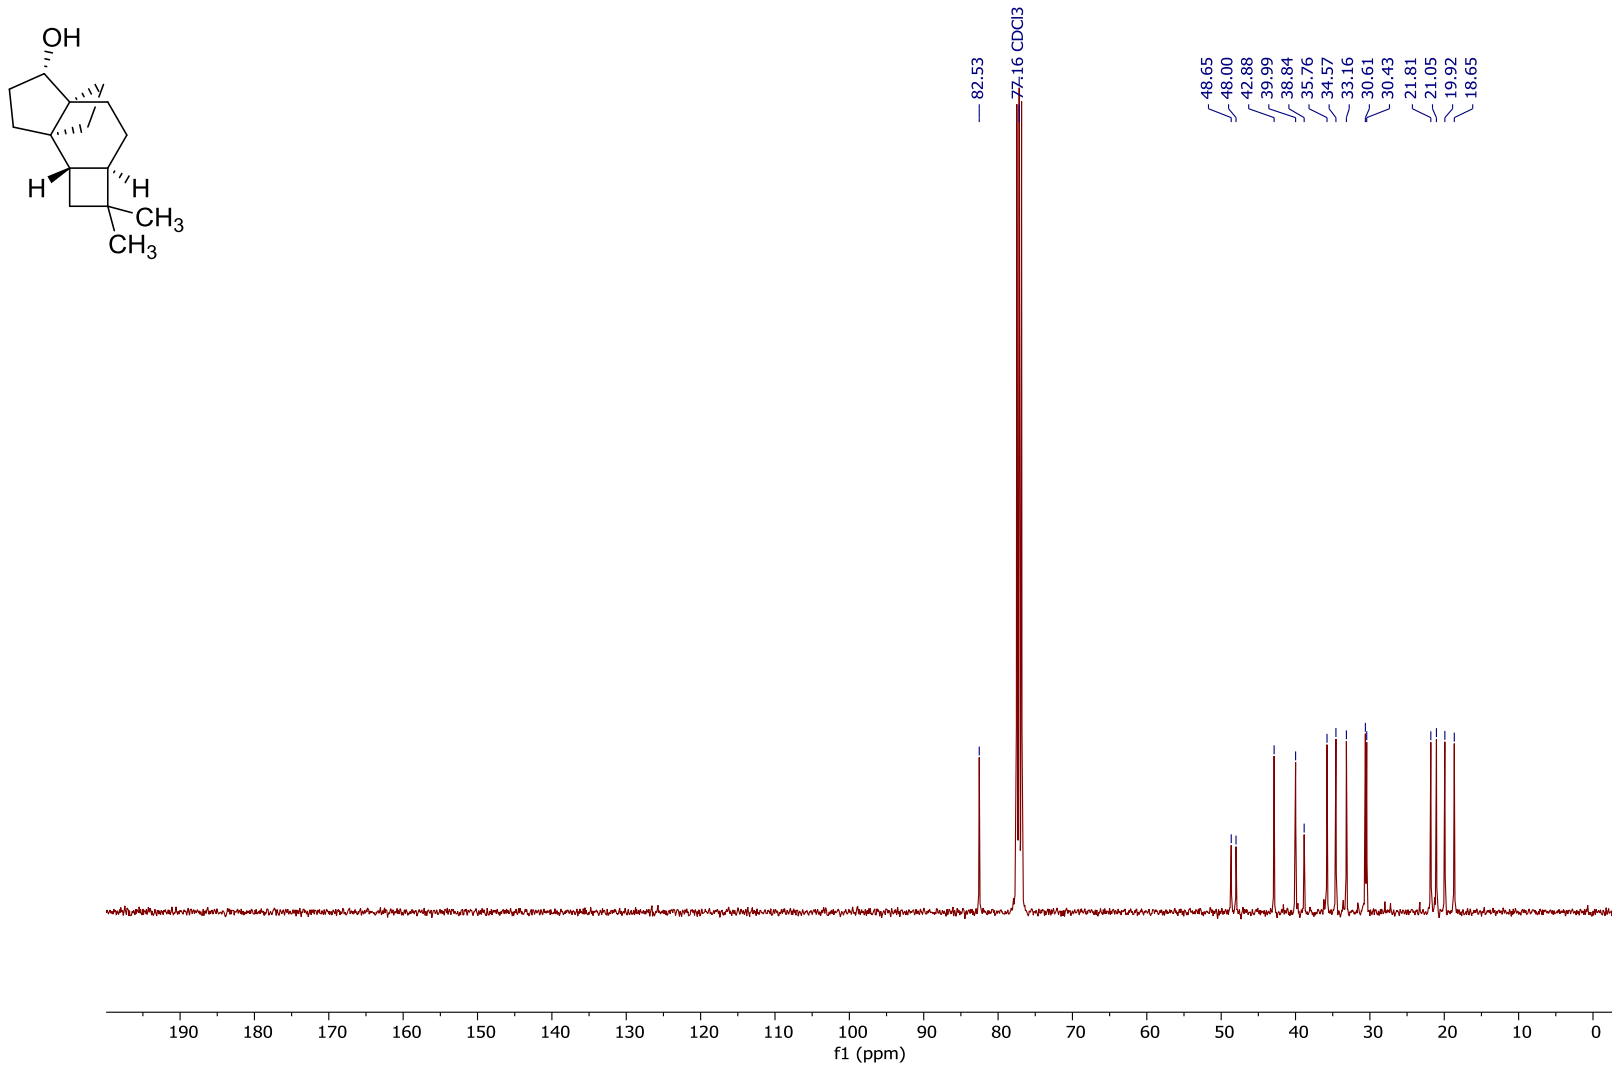

COSY of (2a*R*,4a*R*,5*S*,7a*R*,7b*S*)-2,2-dimethyloctahydro-5*H*-4a,7a-ethanocyclobuta[*e*]inden-5-ol (**9**)

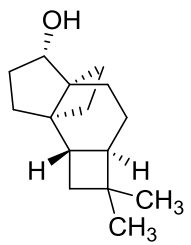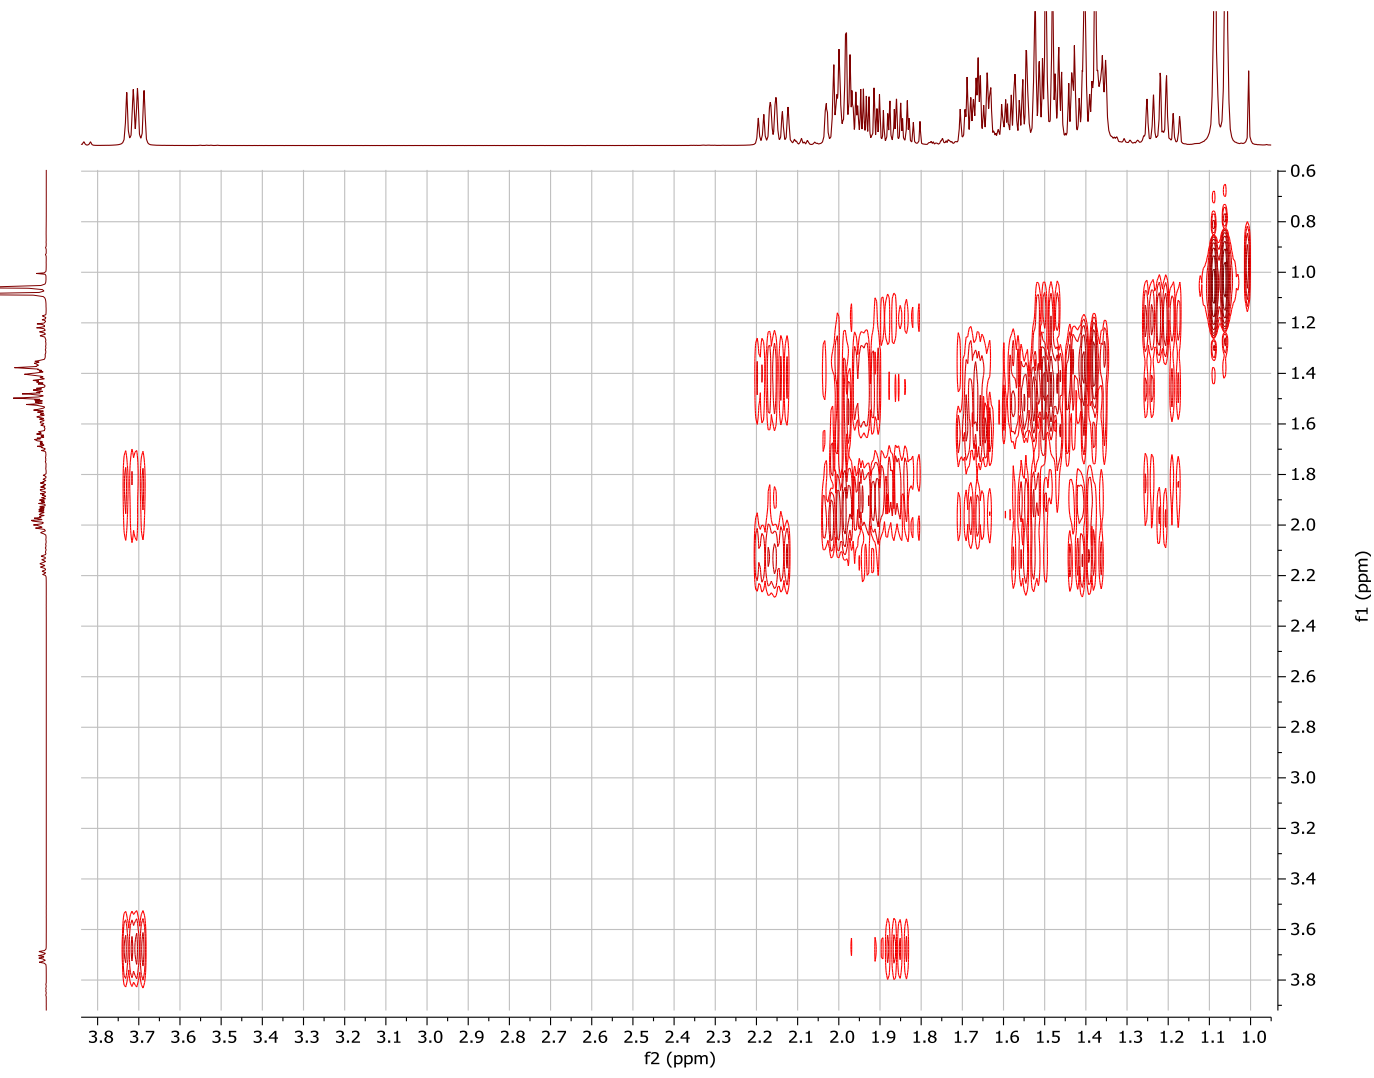

NOESY of (2a*R*,4a*R*,5*S*,7a*R*,7b*S*)-2,2-dimethyloctahydro-5*H*-4a,7a-ethanocyclobuta[*e*]inden-5-ol (**9**)

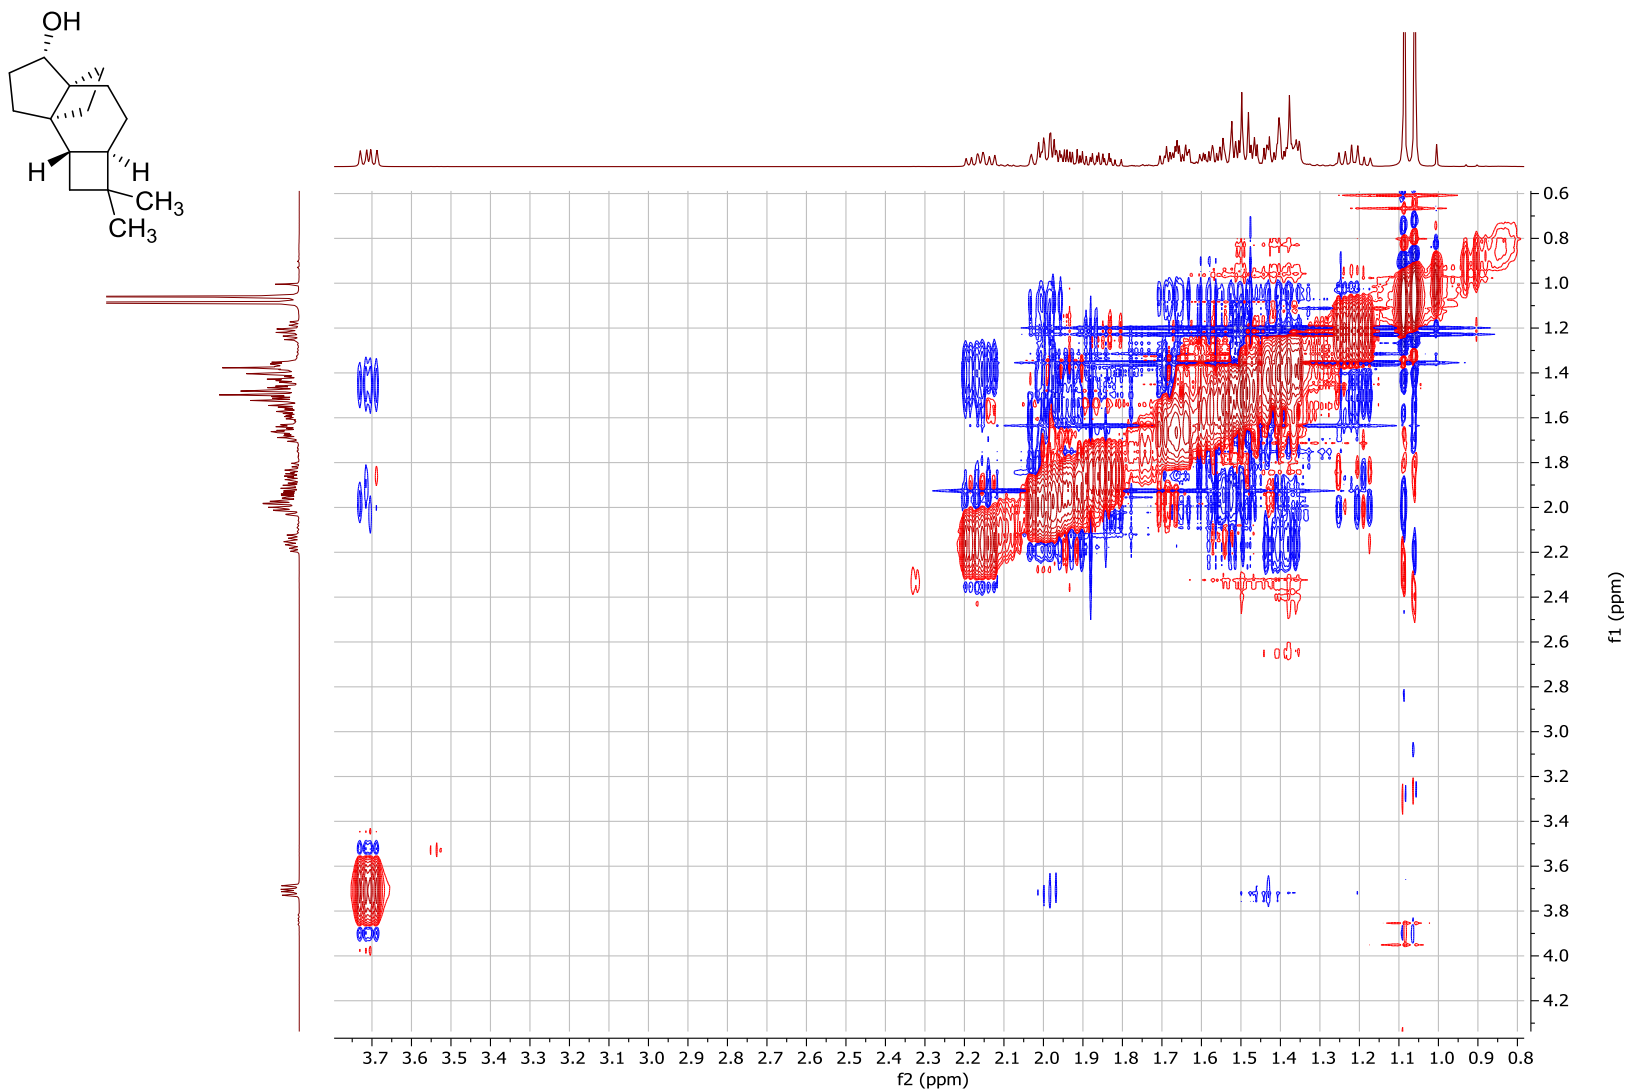

HSQC of (2a*R*,4a*R*,5*S*,7a*R*,7b*S*)-2,2-dimethyloctahydro-5*H*-4a,7a-ethanocyclobuta[*e*]inden-5-ol (**9**)

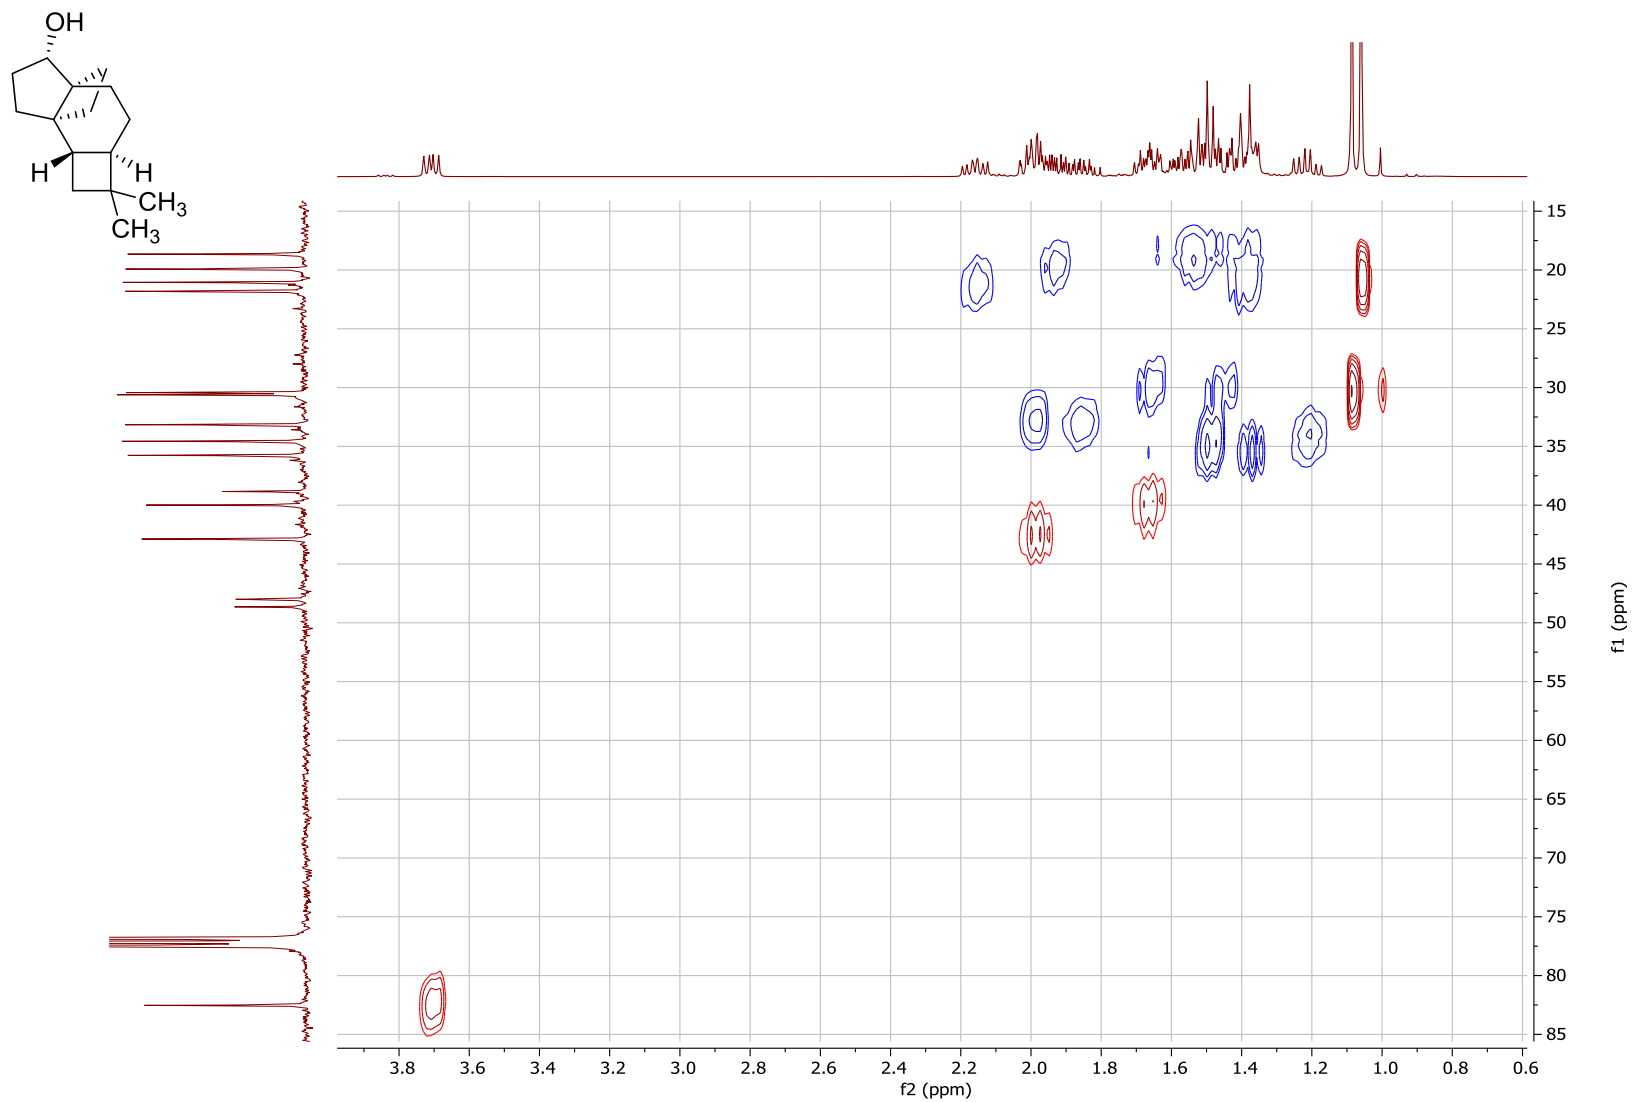

HMBC of (2a*R*,4a*R*,5*S*,7a*R*,7b*S*)-2,2-dimethyloctahydro-5*H*-4a,7a-ethanocyclobuta[*e*]inden-5-ol (**9**)

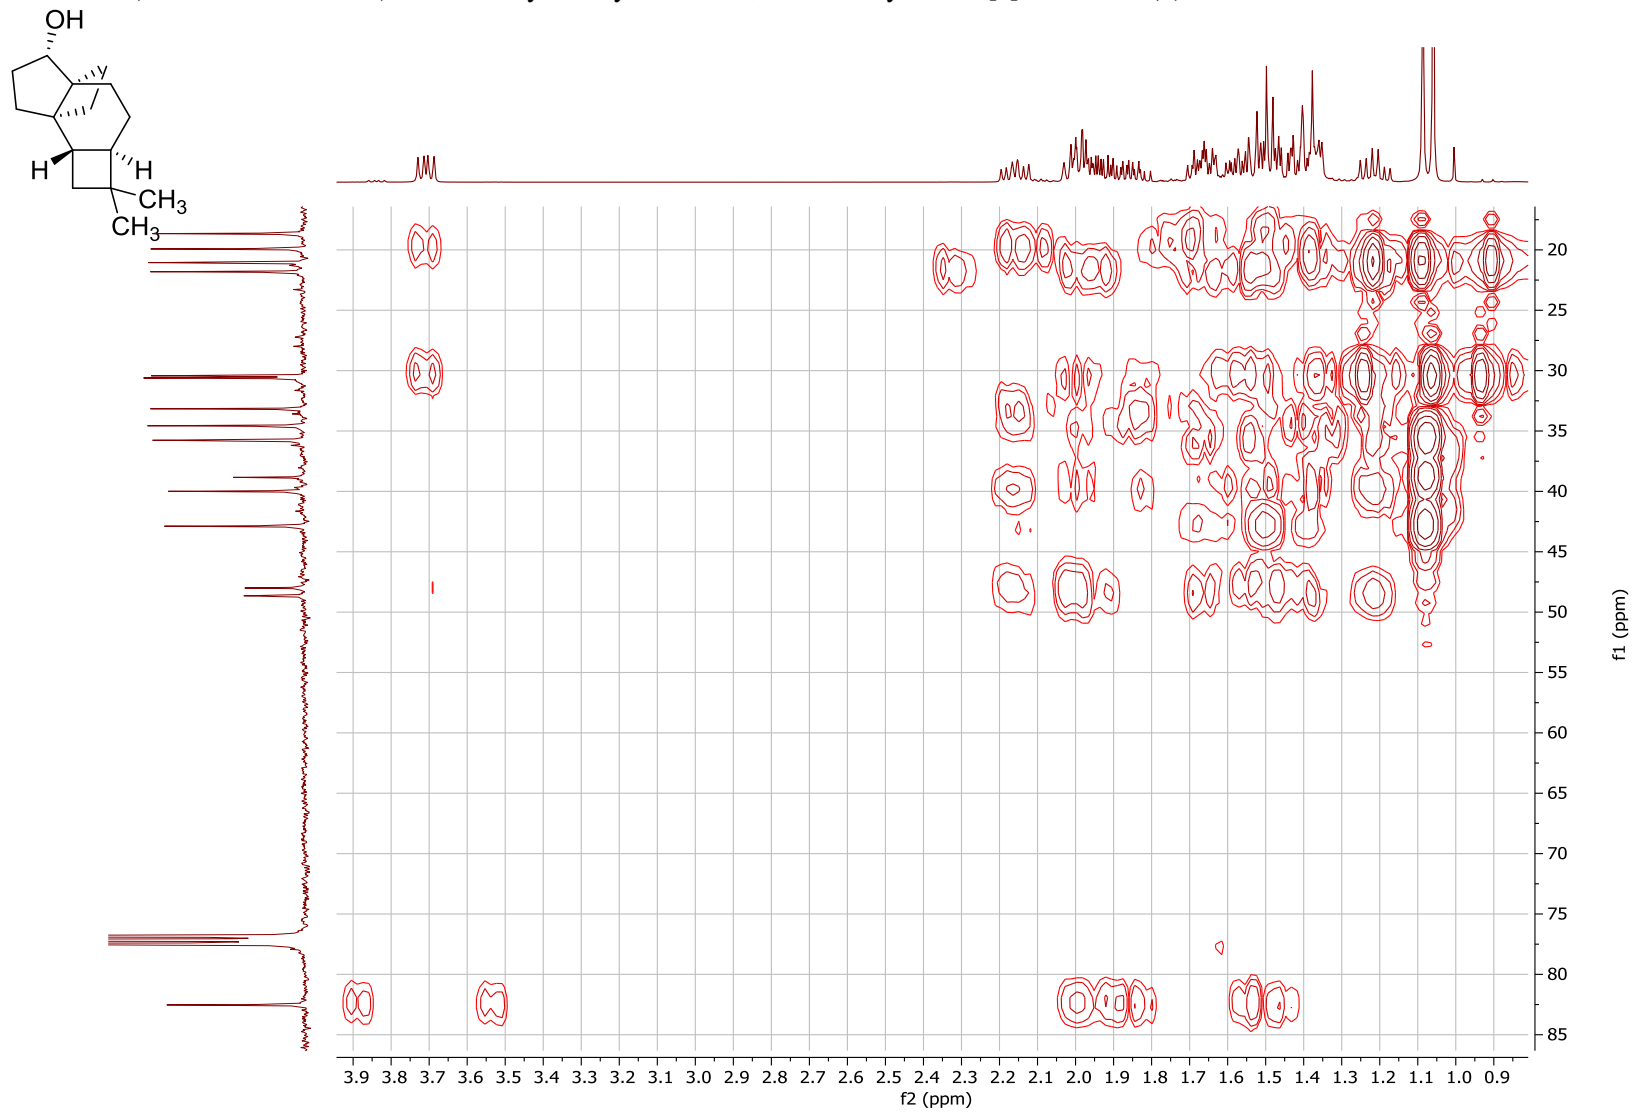



S5. NMR of (2aR,4aR,5S,7aR,7bS)-2,2-dimethyloctahydro-5H-4a,7a-ethanocyclobuta[e]inden-5-yl 4-nitrobenzoate (**13**)

<sup>1</sup>H NMR (400 MHz, CDCl<sub>3</sub>) of (2aR,4aR,5S,7aR,7bS)-2,2-dimethyloctahydro-5H-4a,7a-ethanocyclobuta[e]inden-5-yl 4-nitrobenzoate (**13**)

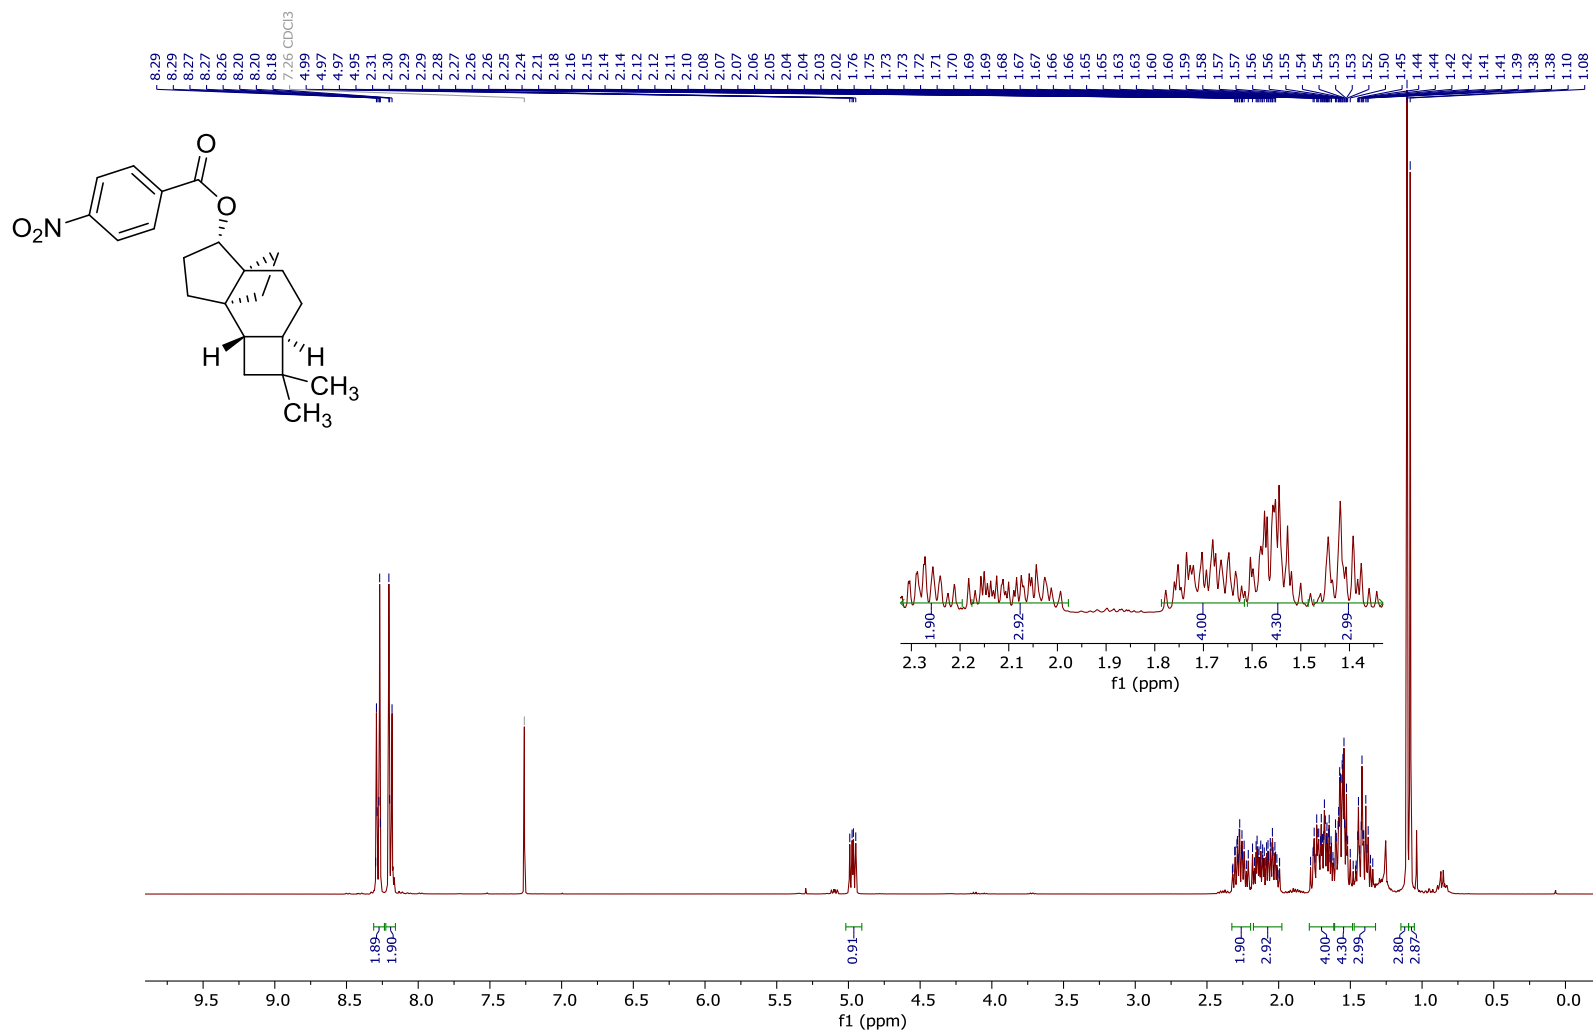

$^{13}\text{C}$  NMR (101 MHz,  $\text{CDCl}_3$ ) of (2a*R*,4a*R*,5*S*,7a*R*,7b*S*)-2,2-dimethyloctahydro-5*H*-4a,7a-ethanocyclobuta[*e*]inden-5-yl 4-nitrobenzoate (**13**)

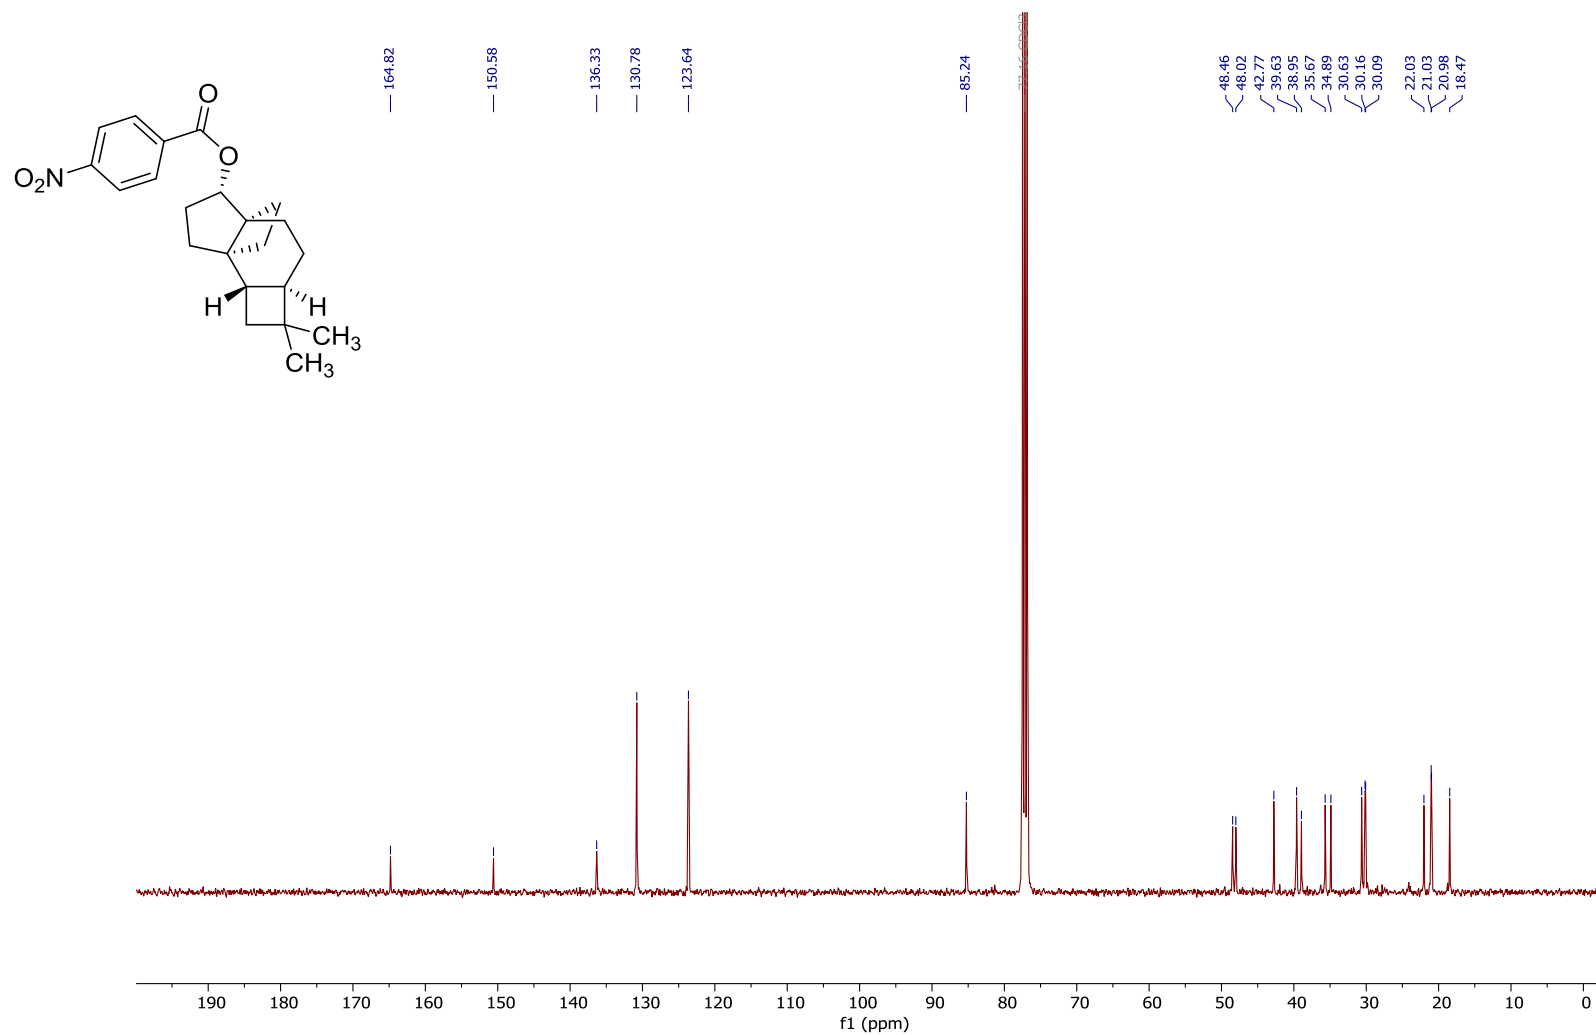



$^{13}\text{C}$  NMR (101 MHz,  $\text{C}_6\text{D}_6$ ) of (2a*R*,4a*R*,5*S*,7a*R*,7b*S*)-2,2-dimethyloctahydro-5*H*-4a,7a-ethanocyclobuta[*e*]inden-5-yl methanesulfonate (**14**)

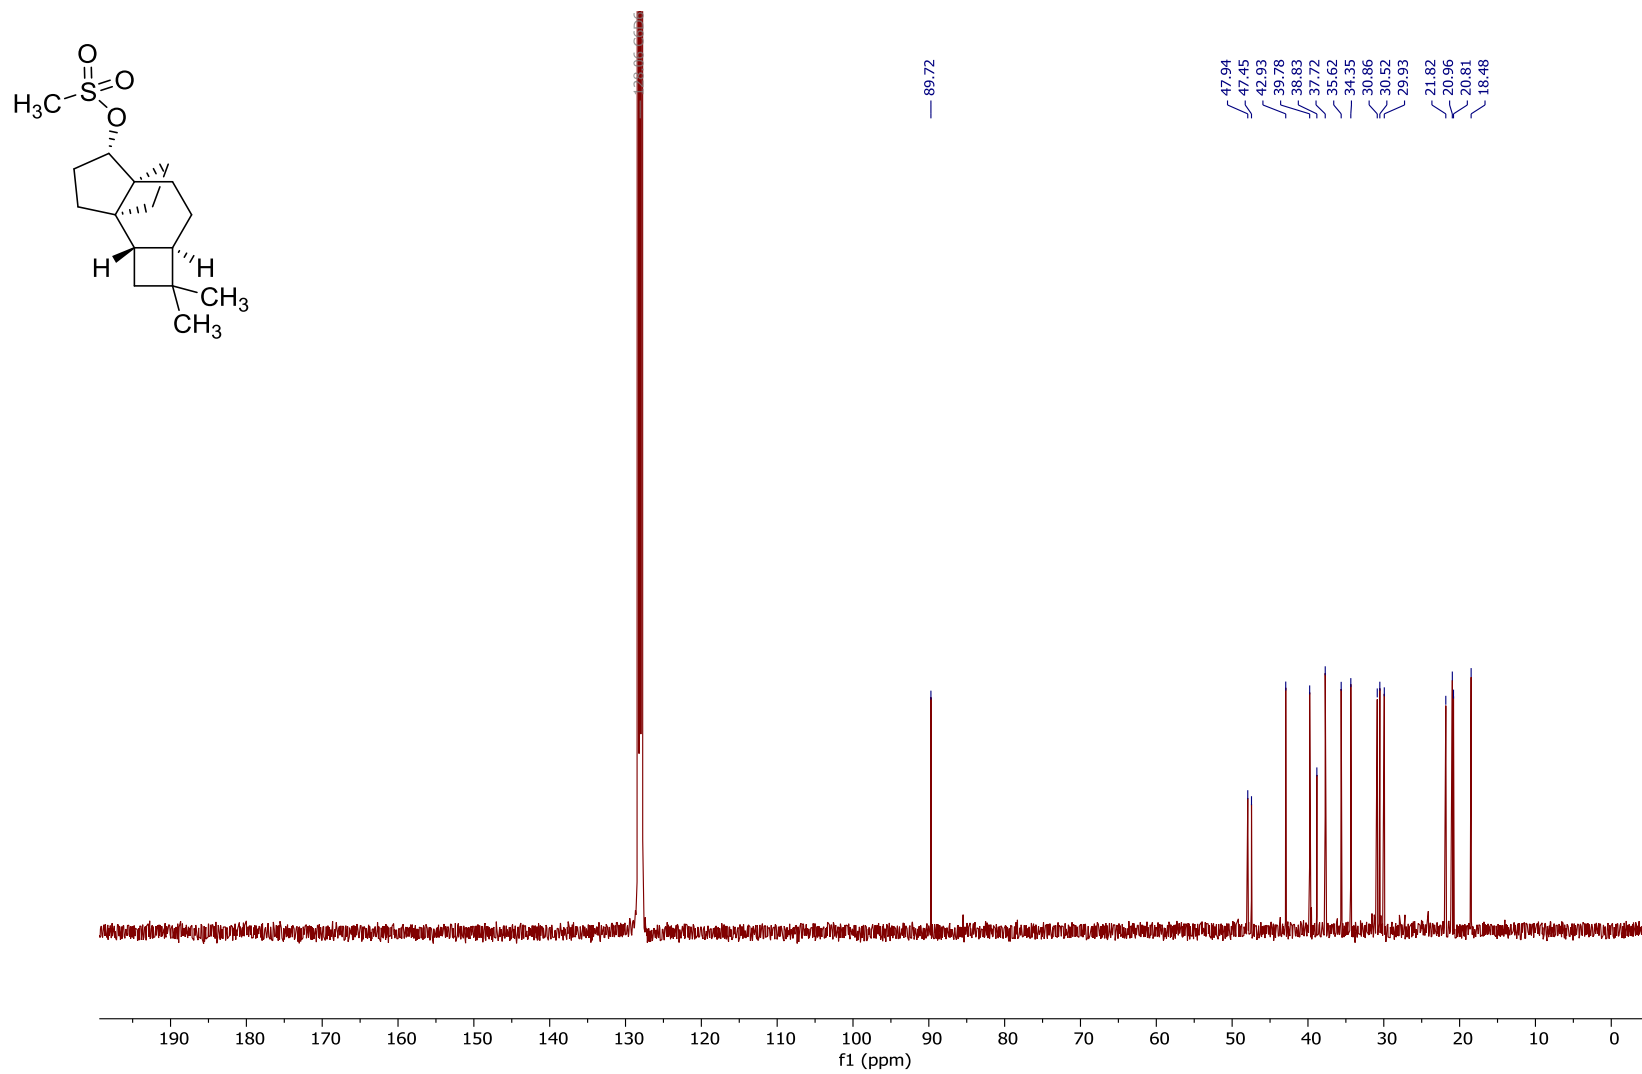

S7. NMR of (1*R*,2*S*,5*R*)-4,4-dimethyltricyclo[6.3.2.0<sup>2,5</sup>]tridec-8-en-1-ol (**10**)

<sup>1</sup>H NMR (400 MHz, CDCl<sub>3</sub>) of (1*R*,2*S*,5*R*)-4,4-dimethyltricyclo[6.3.2.0<sup>2,5</sup>]tridec-8-en-1-ol (**10**)

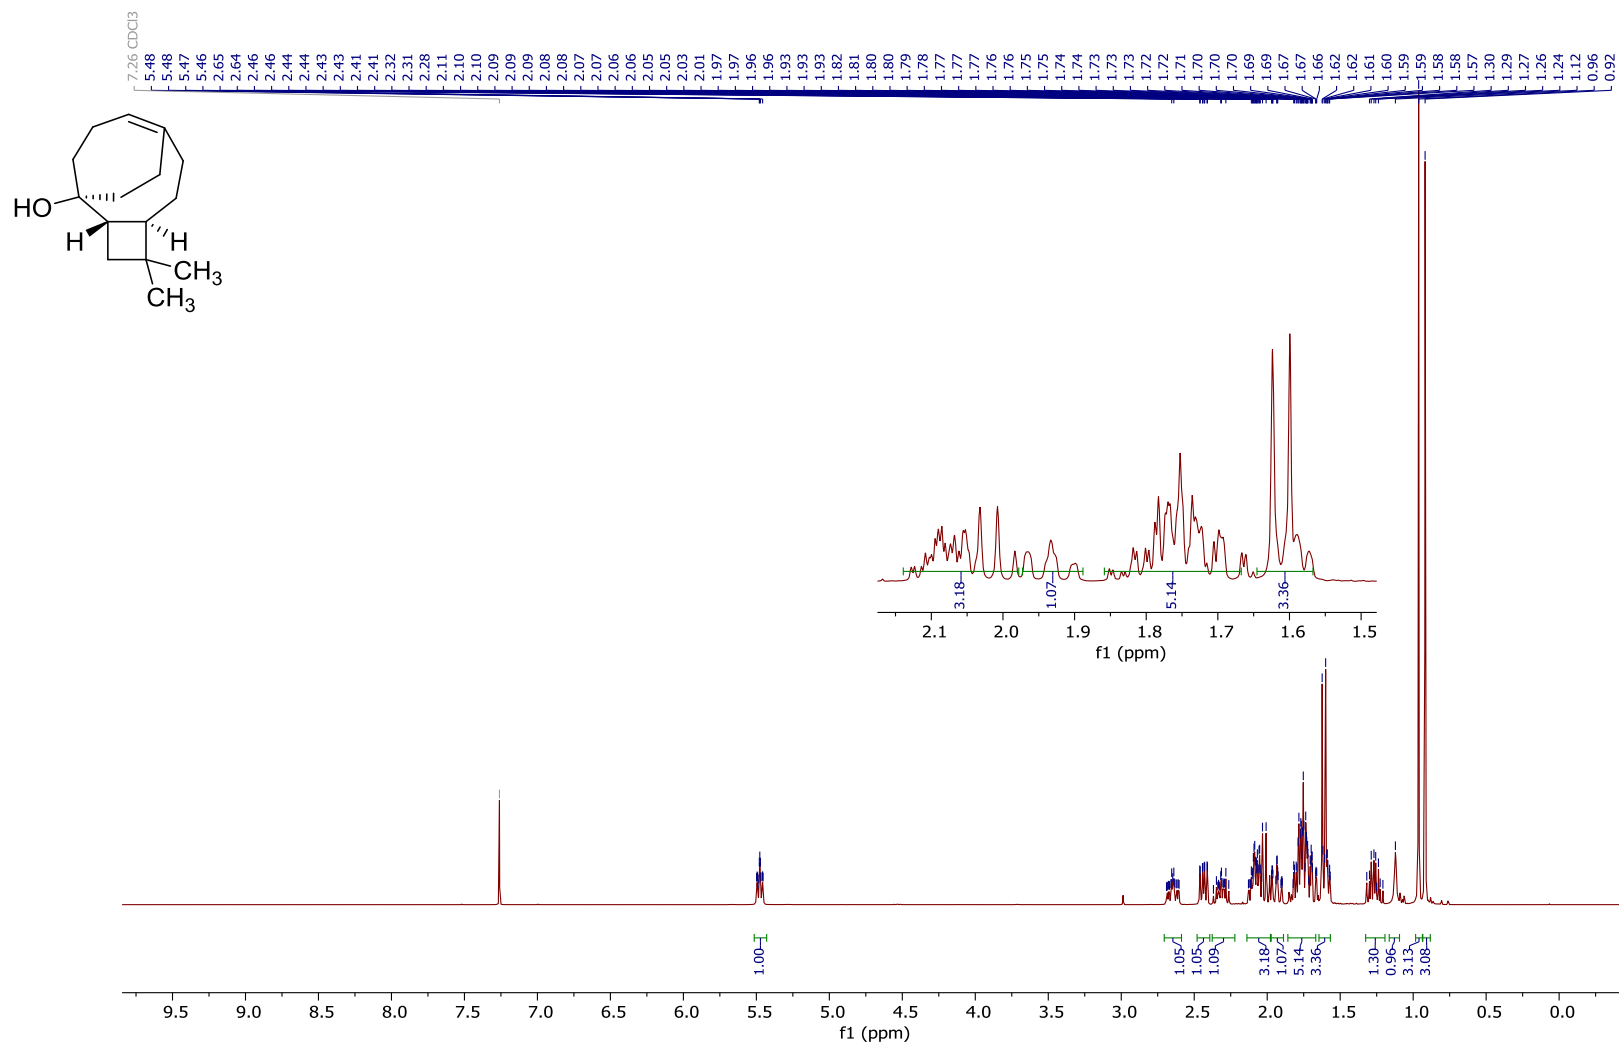

$^{13}\text{C}$  NMR (400 MHz,  $\text{CDCl}_3$ ) of (1*R*,2*S*,5*R*)-4,4-dimethyltricyclo[6.3.2.0<sup>2,5</sup>]tridec-8-en-1-ol (**10**)

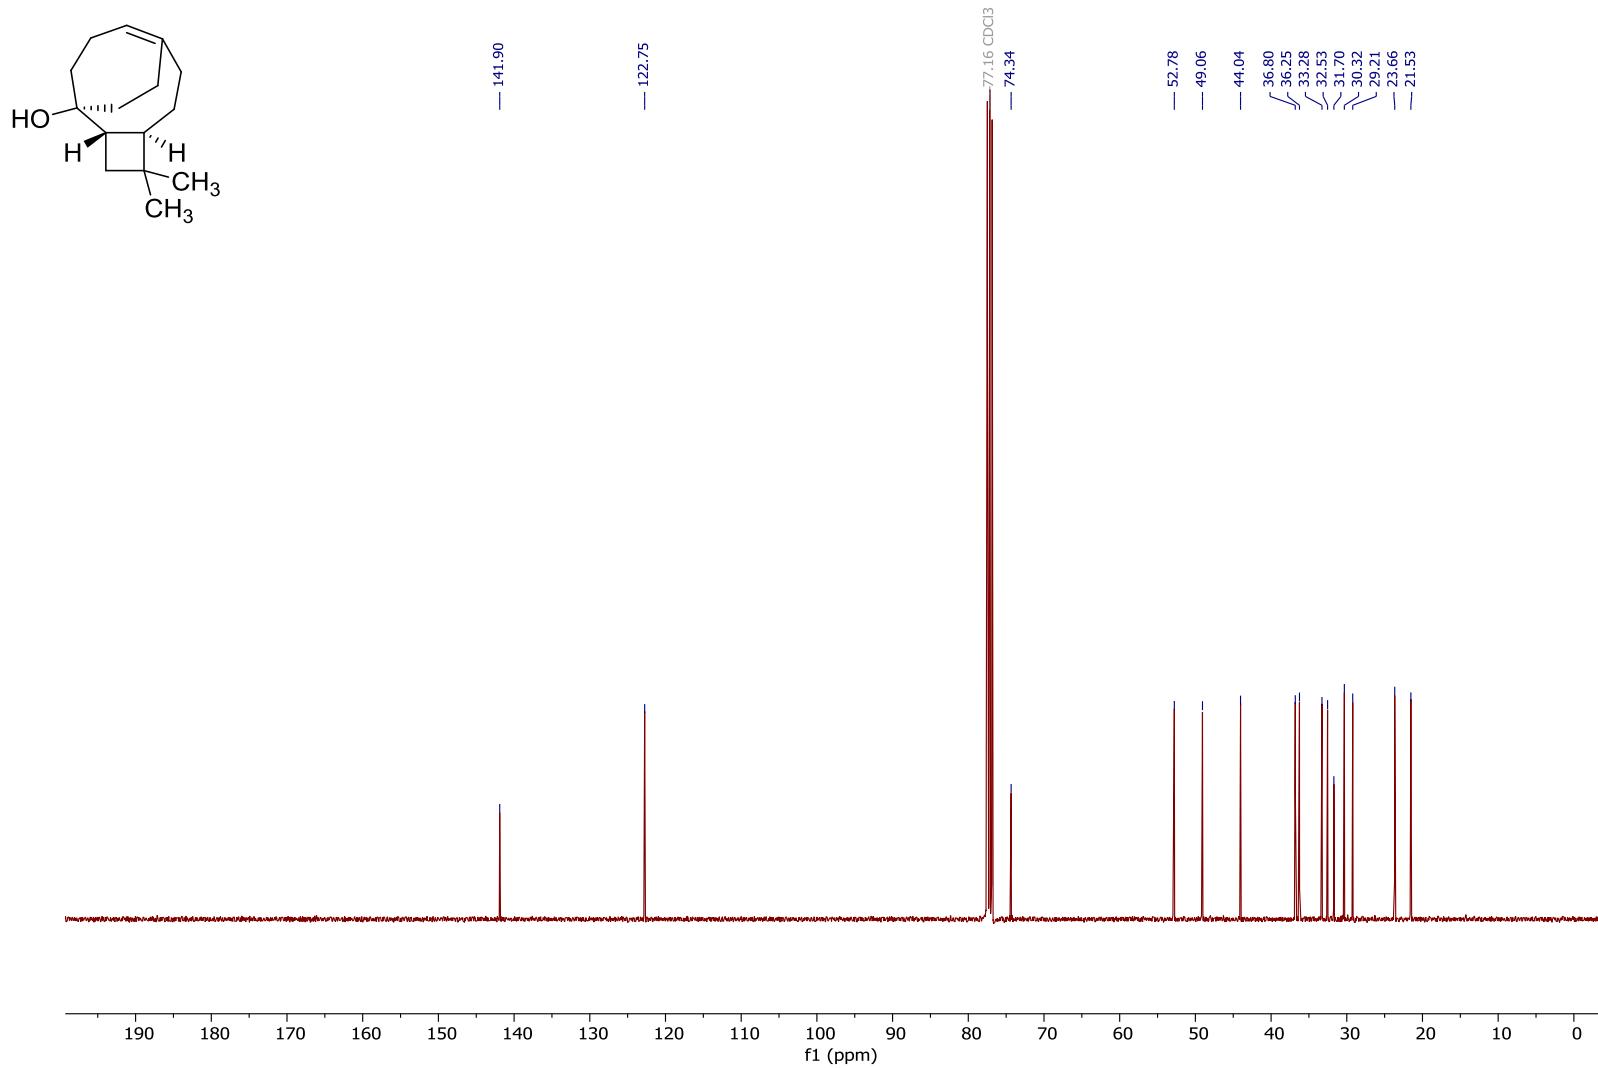

COSY of (1*R*,2*S*,5*R*)-4,4-dimethyltricyclo[6.3.2.0<sup>2,5</sup>]tridec-8-en-1-ol (**10**)

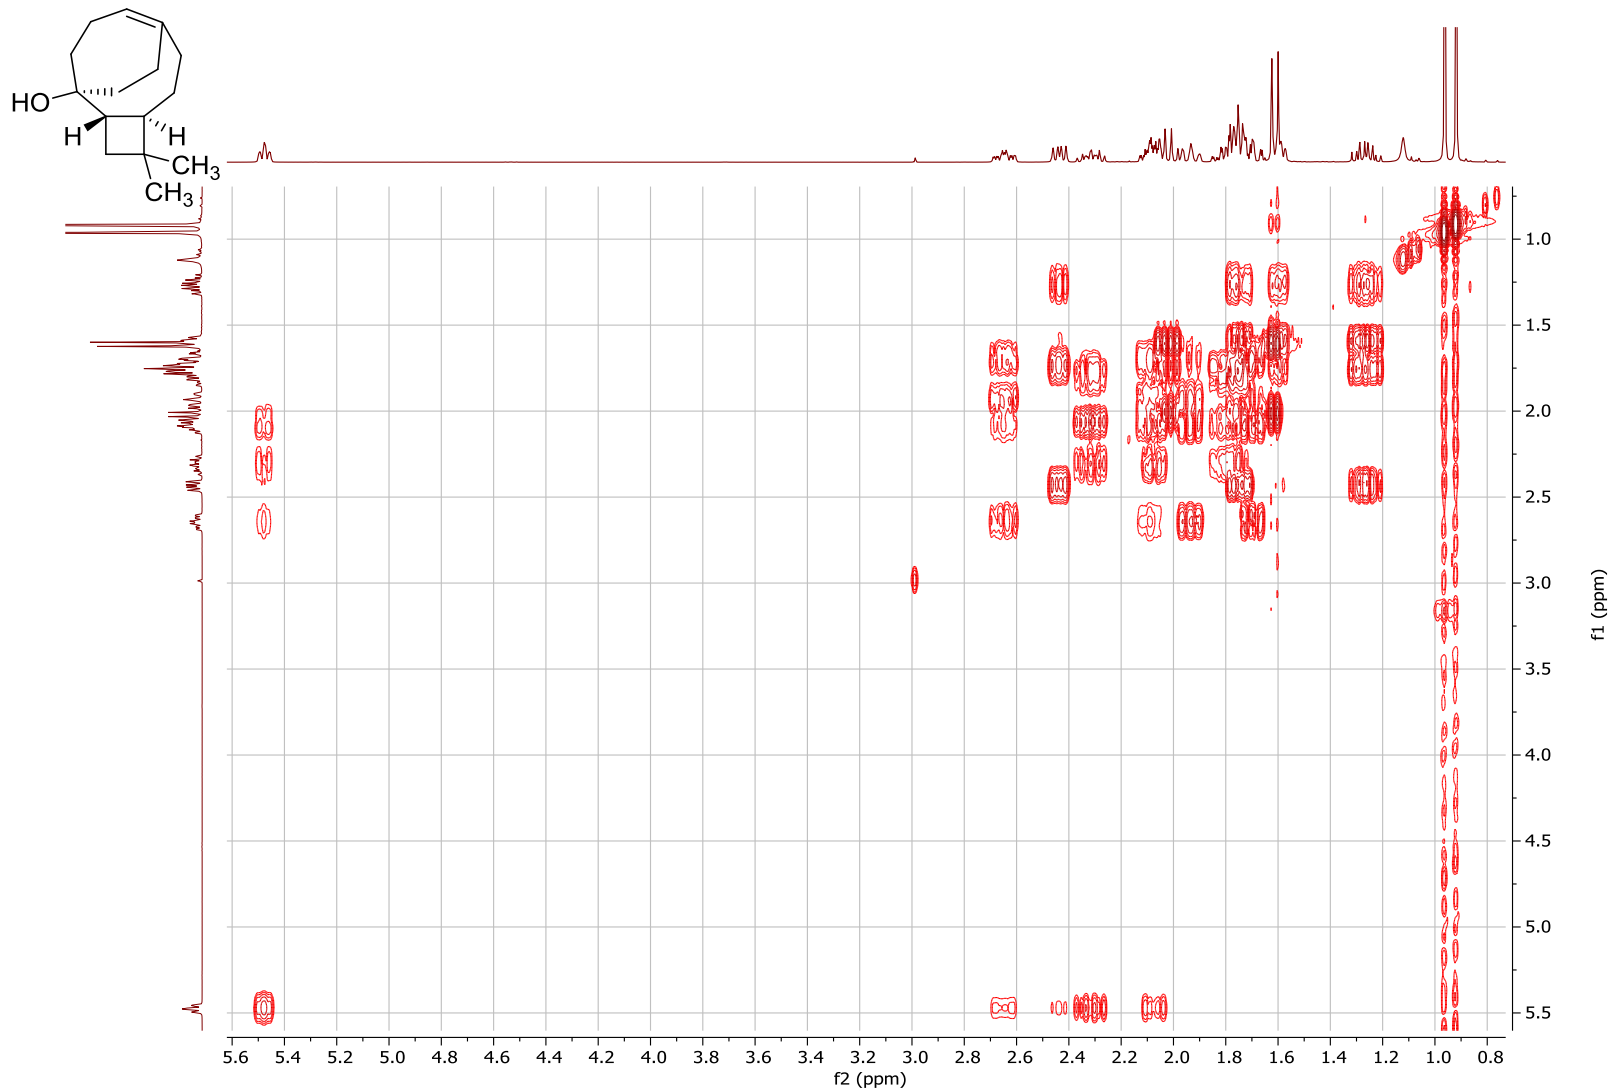

NOESY of (1*R*,2*S*,5*R*)-4,4-dimethyltricyclo[6.3.2.0<sup>2,5</sup>]tridec-8-en-1-ol (**10**)

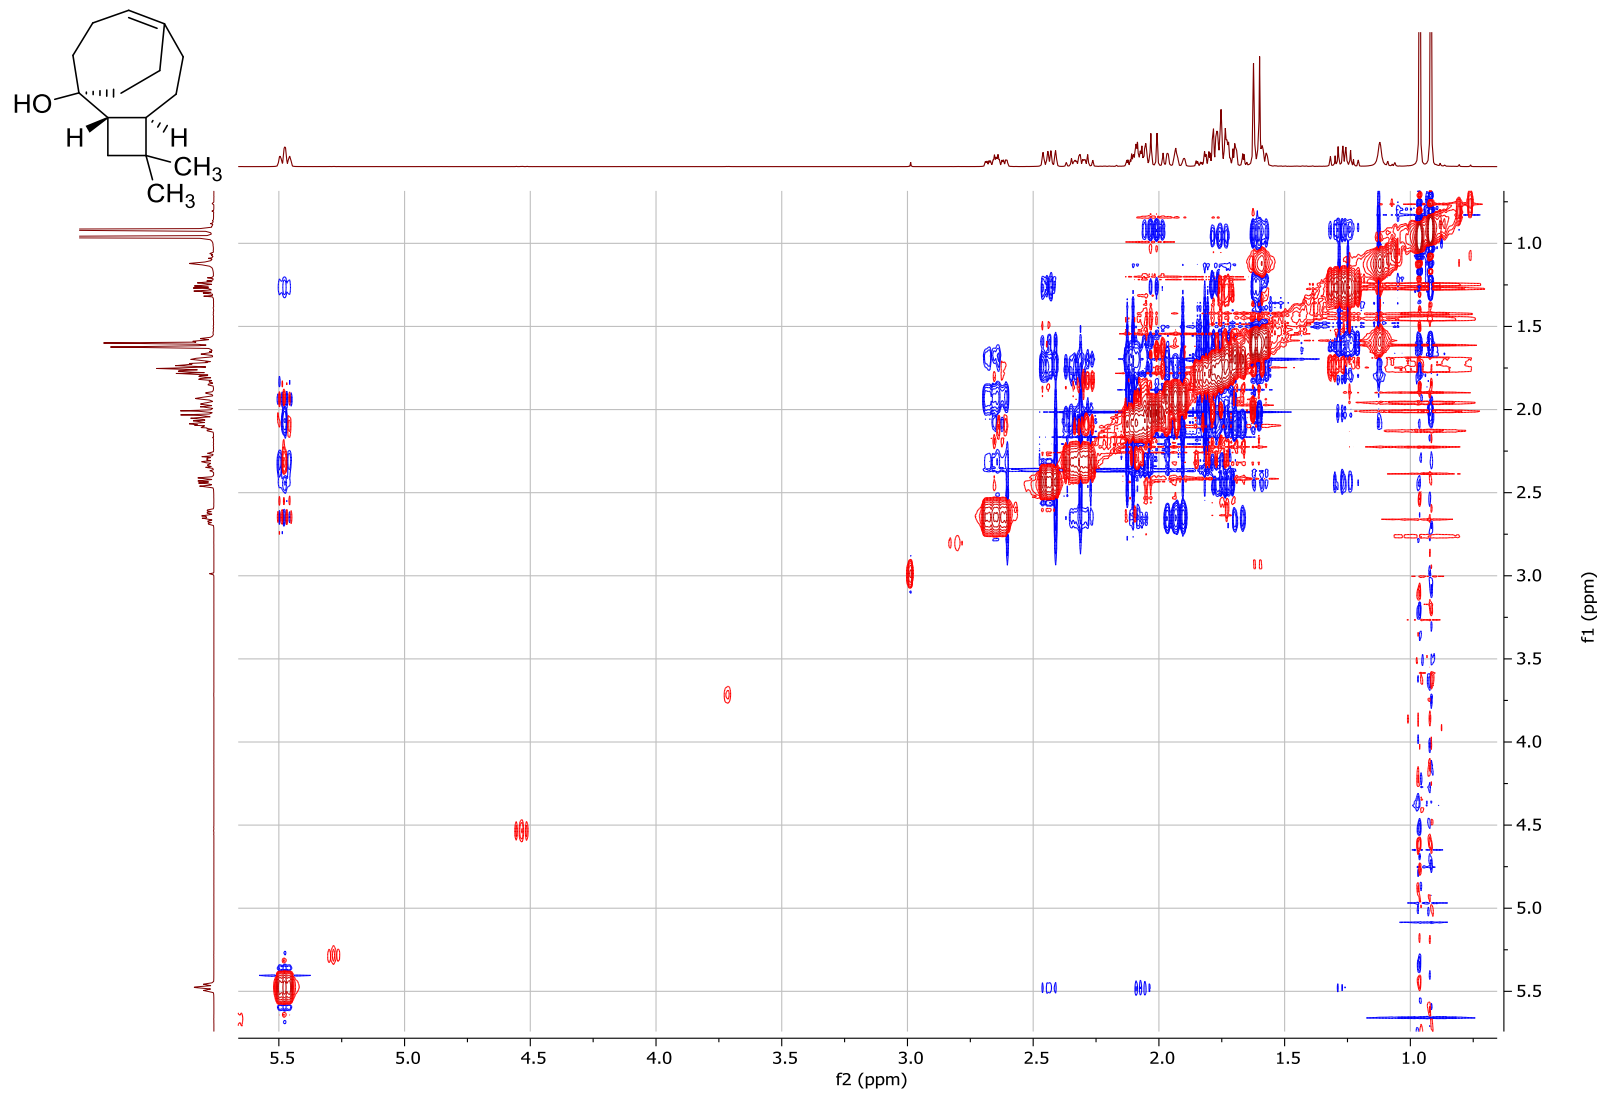



HSQC of (1*R*,2*S*,5*R*)-4,4-dimethyltricyclo[6.3.2.0<sup>2,5</sup>]tridec-8-en-1-ol (**10**)

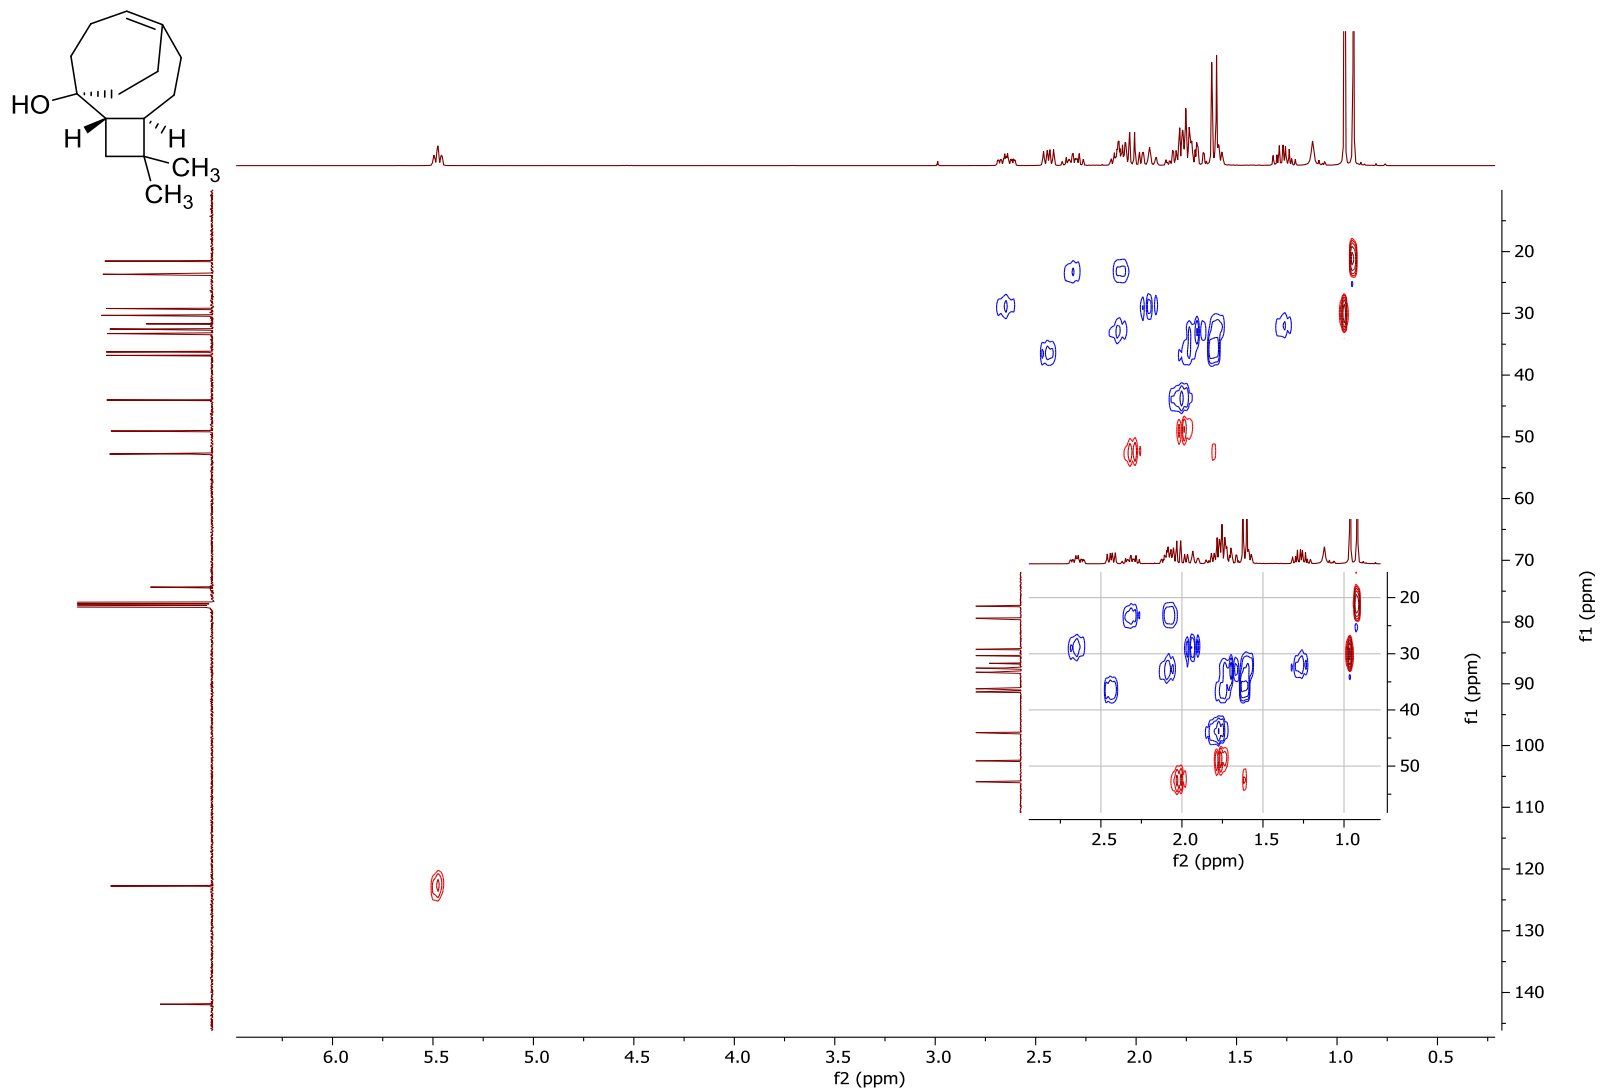

HMBC of (1*R*,2*S*,5*R*)-4,4-dimethyltricyclo[6.3.2.0<sup>2,5</sup>]tridec-8-en-1-ol (**10**)

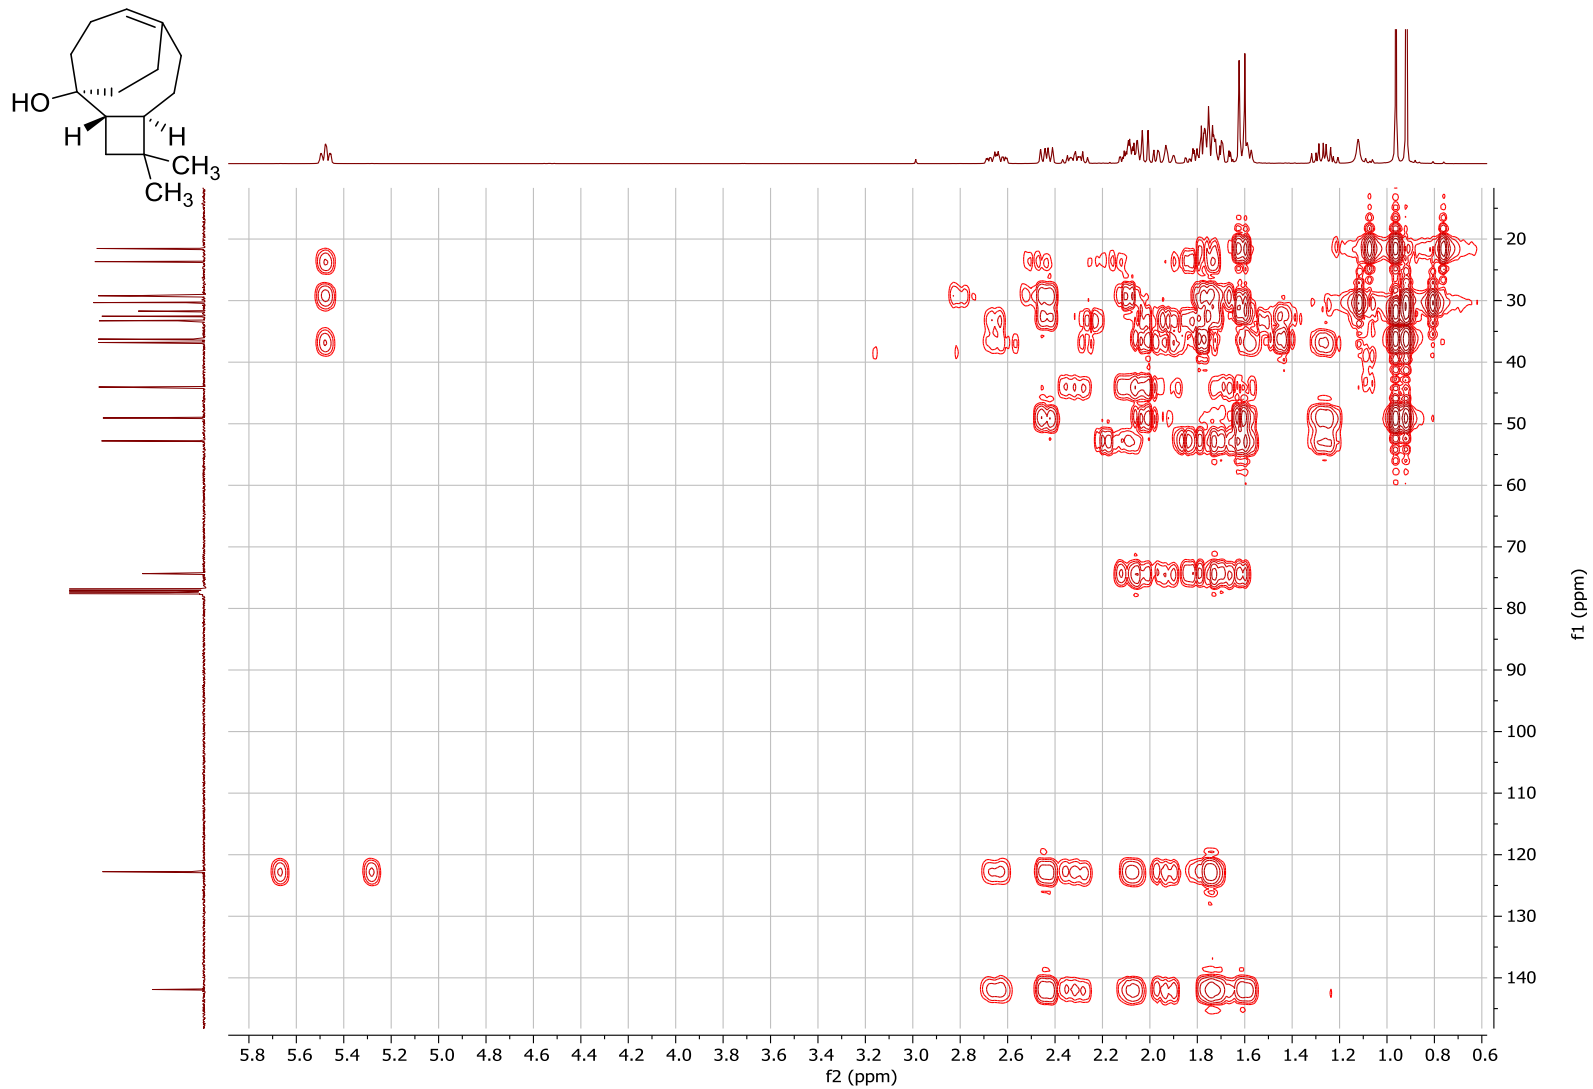

**S8.** NMR of (1*S*,2*S*,5*R*)-4,4-dimethyltricyclo[6.3.2.0<sup>2,5</sup>]tridec-8-en-1-ol (**7**)

<sup>1</sup>H NMR (400 MHz, CDCl<sub>3</sub>) of (1*S*,2*S*,5*R*)-4,4-dimethyltricyclo[6.3.2.0<sup>2,5</sup>]tridec-8-en-1-ol (**7**)

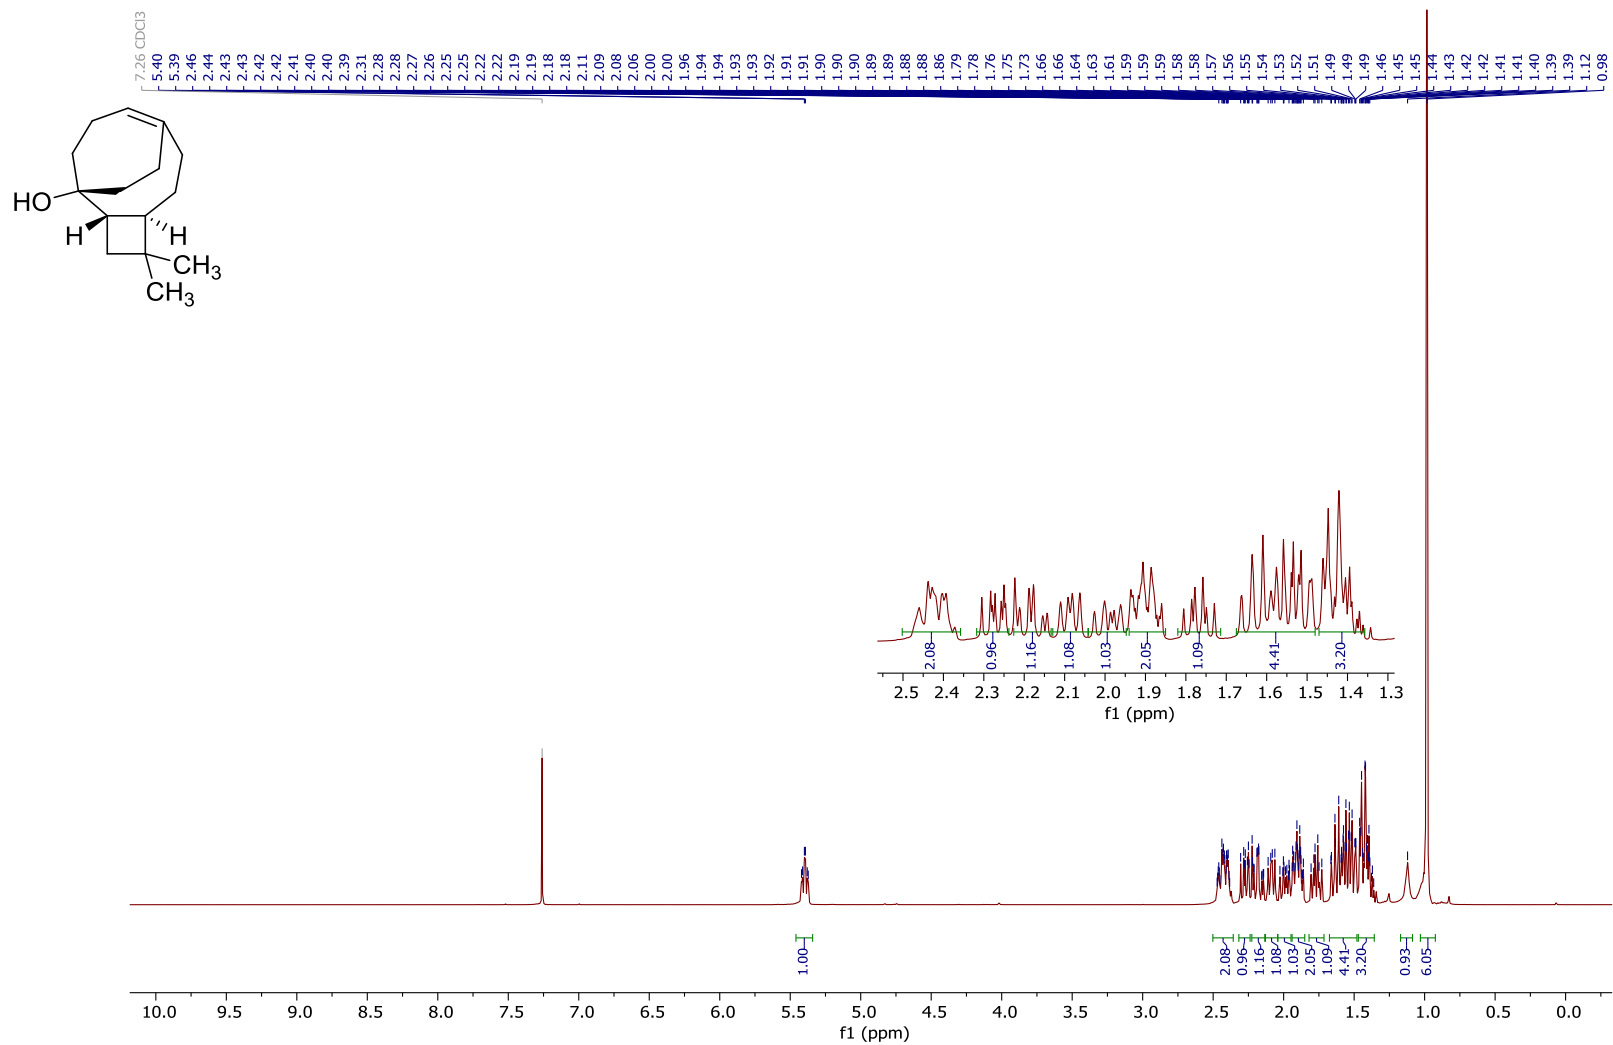

$^{13}\text{C}$  NMR (101 MHz,  $\text{CDCl}_3$ ) of (1*S*,2*S*,5*R*)-4,4-dimethyltricyclo[6.3.2.0<sup>2,5</sup>]tridec-8-en-1-ol (**7**)

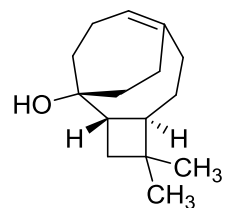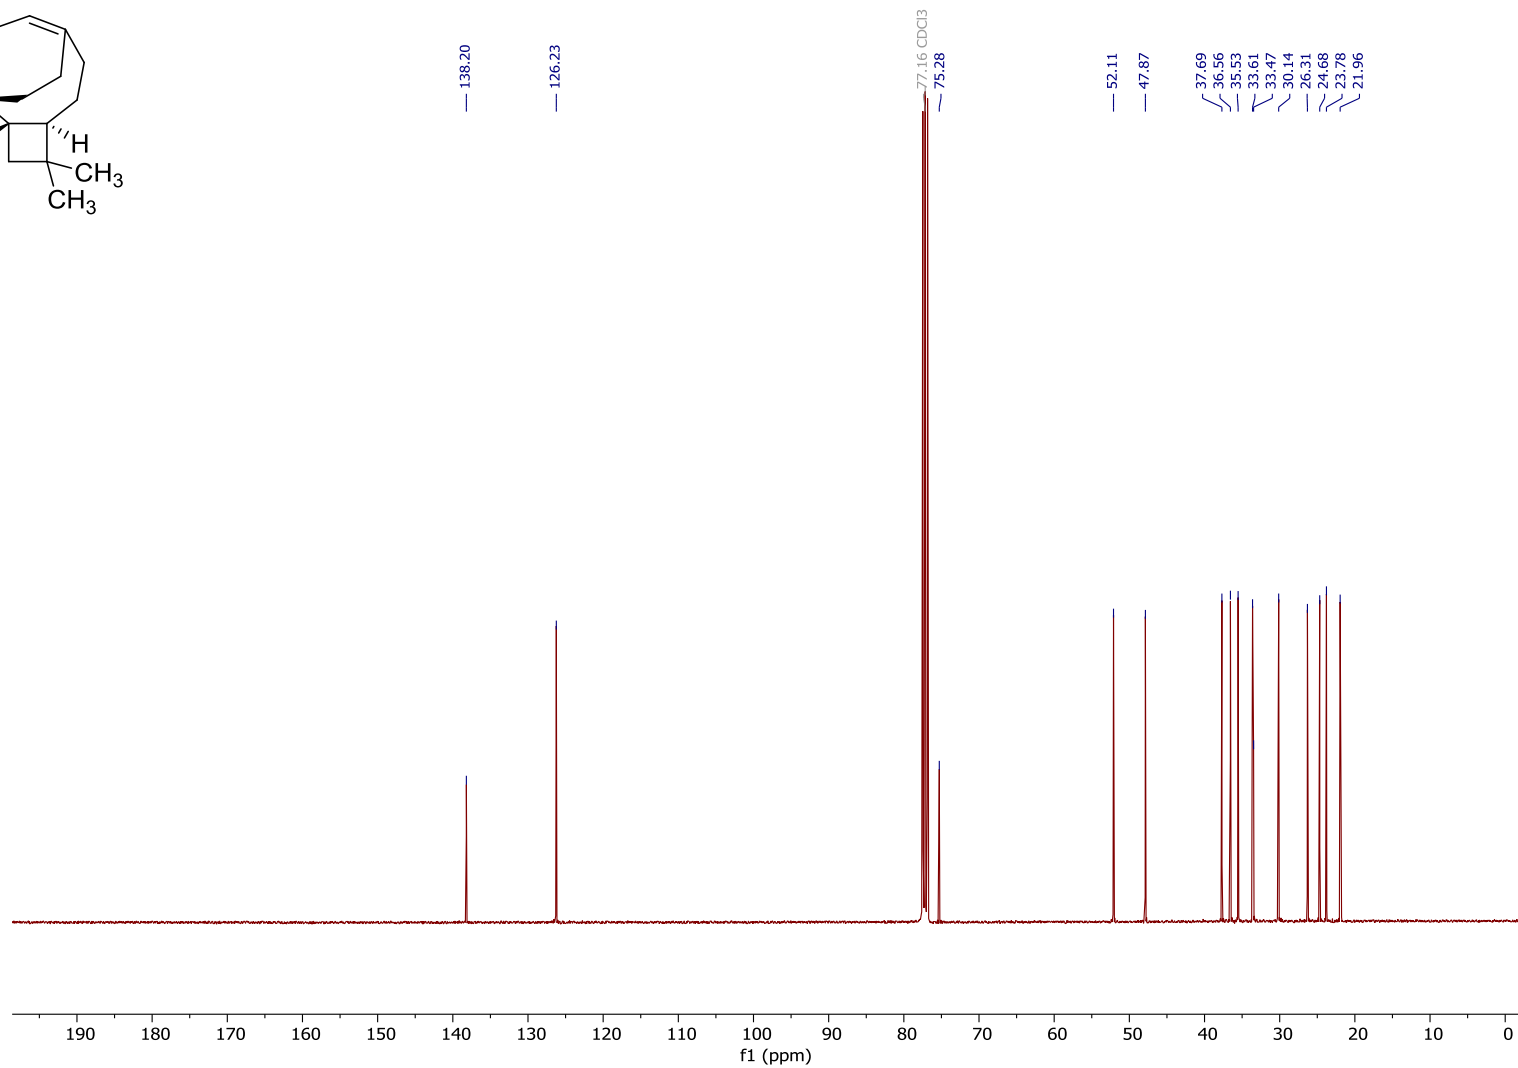

COSY of (1*S*,2*S*,5*R*)-4,4-dimethyltricyclo[6.3.2.0<sup>2,5</sup>]tridec-8-en-1-ol (**7**)

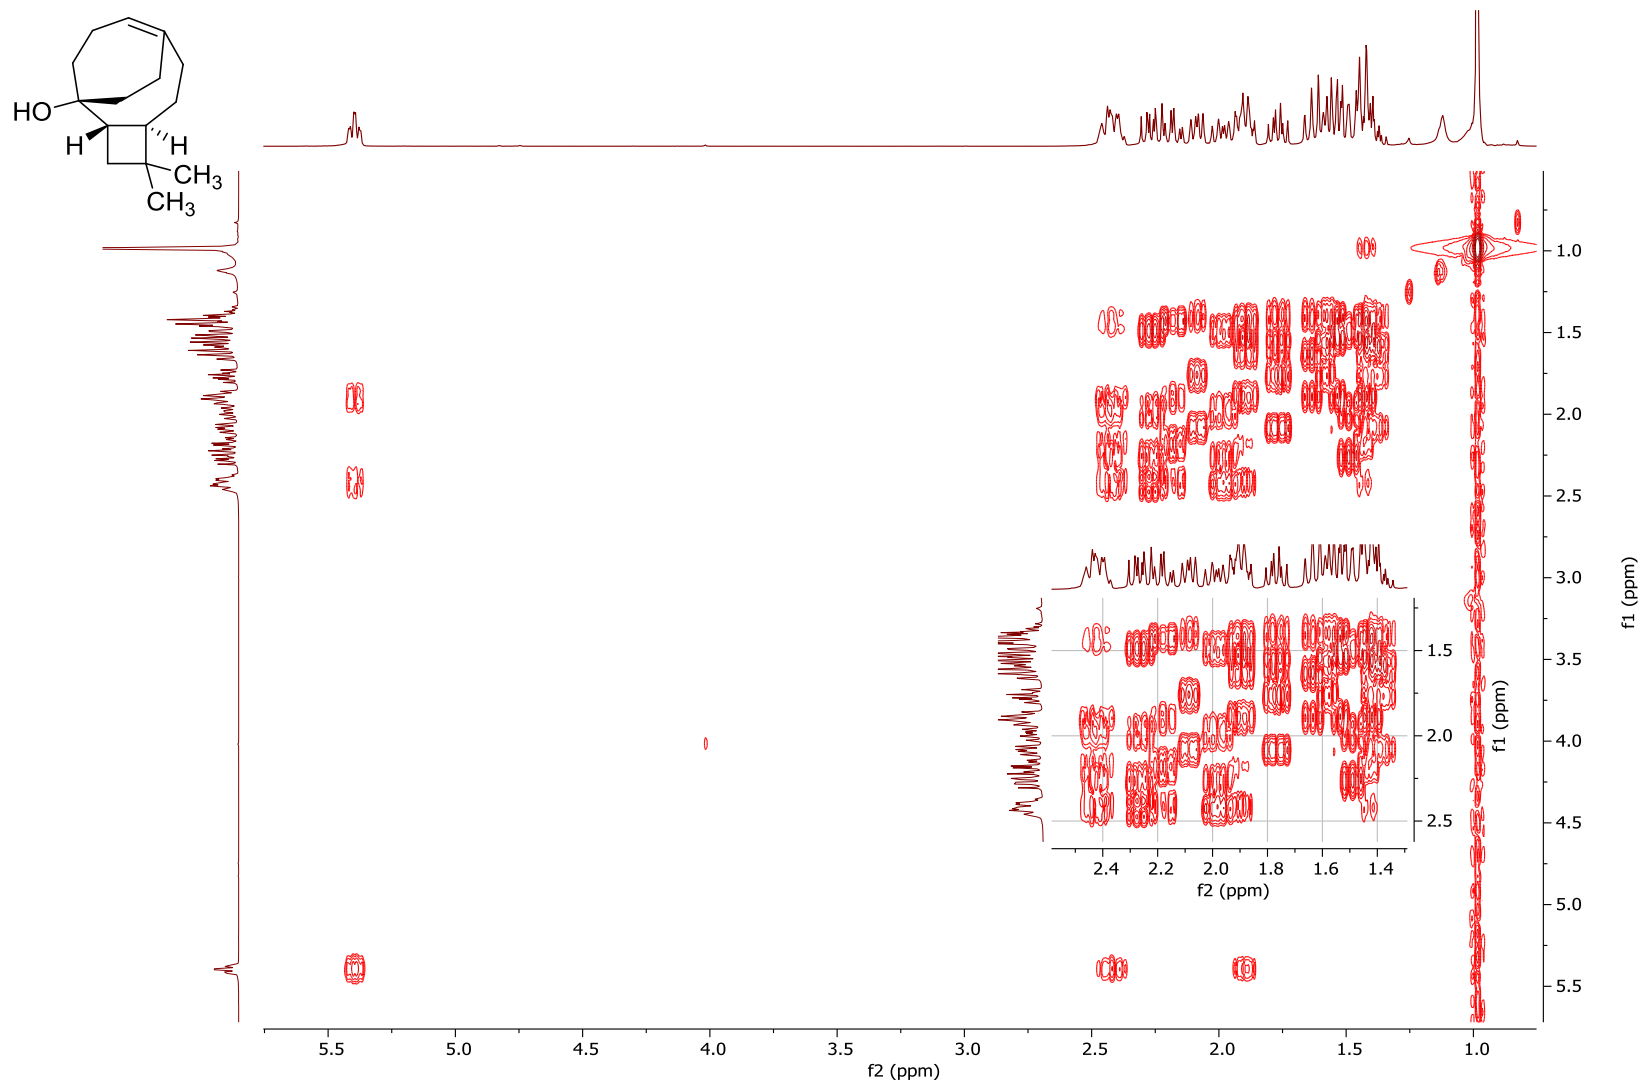

NOESY of (1*S*,2*S*,5*R*)-4,4-dimethyltricyclo[6.3.2.0<sup>2,5</sup>]tridec-8-en-1-ol (**7**)

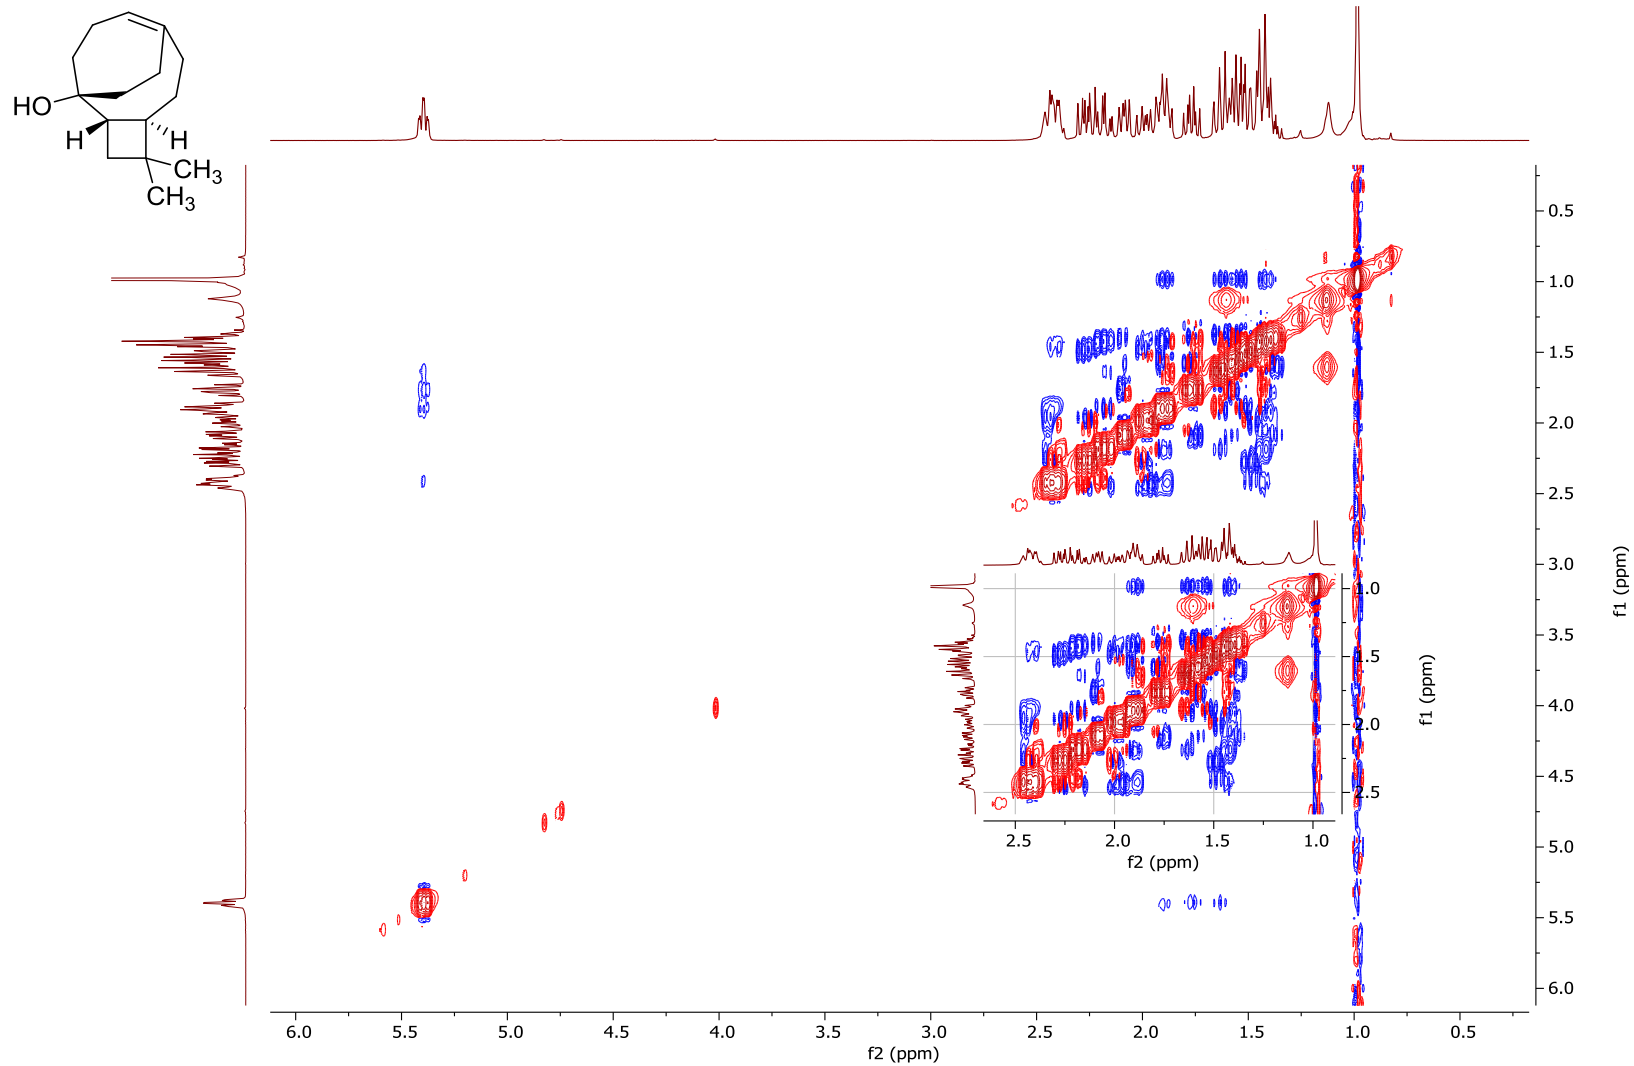

HSQC of (1*S*,2*S*,5*R*)-4,4-dimethyltricyclo[6.3.2.0<sup>2,5</sup>]tridec-8-en-1-ol (**7**)

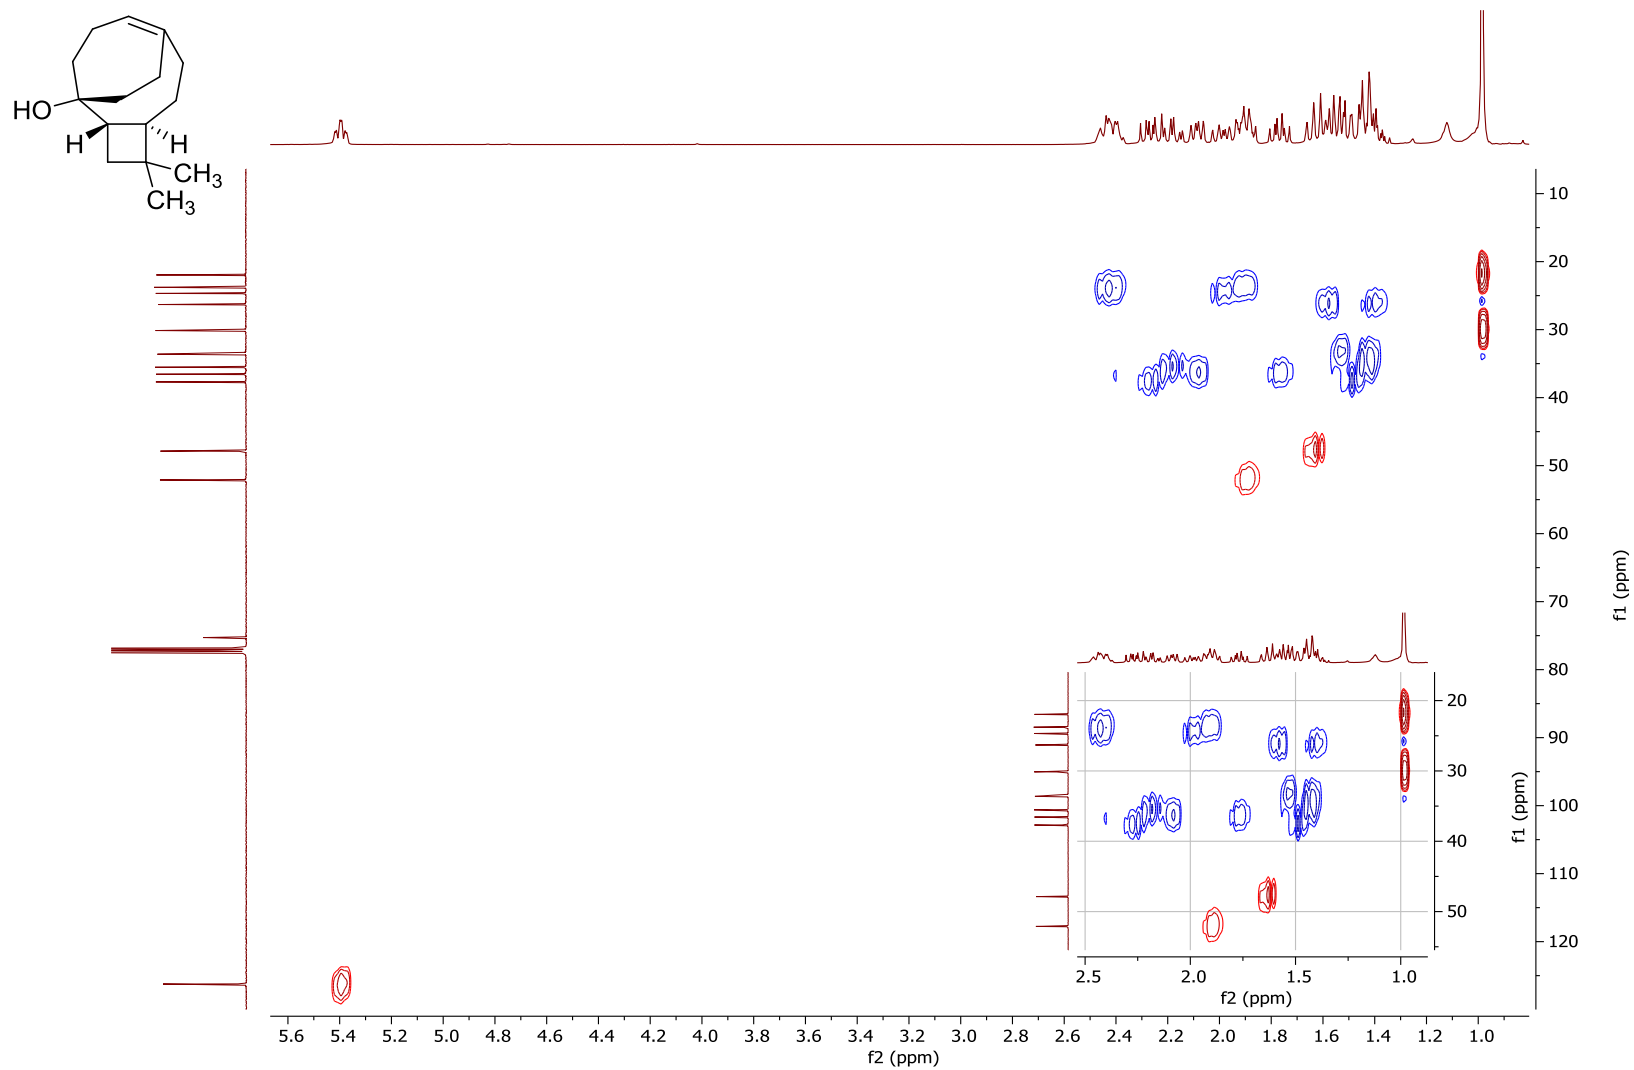

HMBC of (1*S*,2*S*,5*R*)-4,4-dimethyltricyclo[6.3.2.0<sup>2,5</sup>]tridec-8-en-1-ol (7)

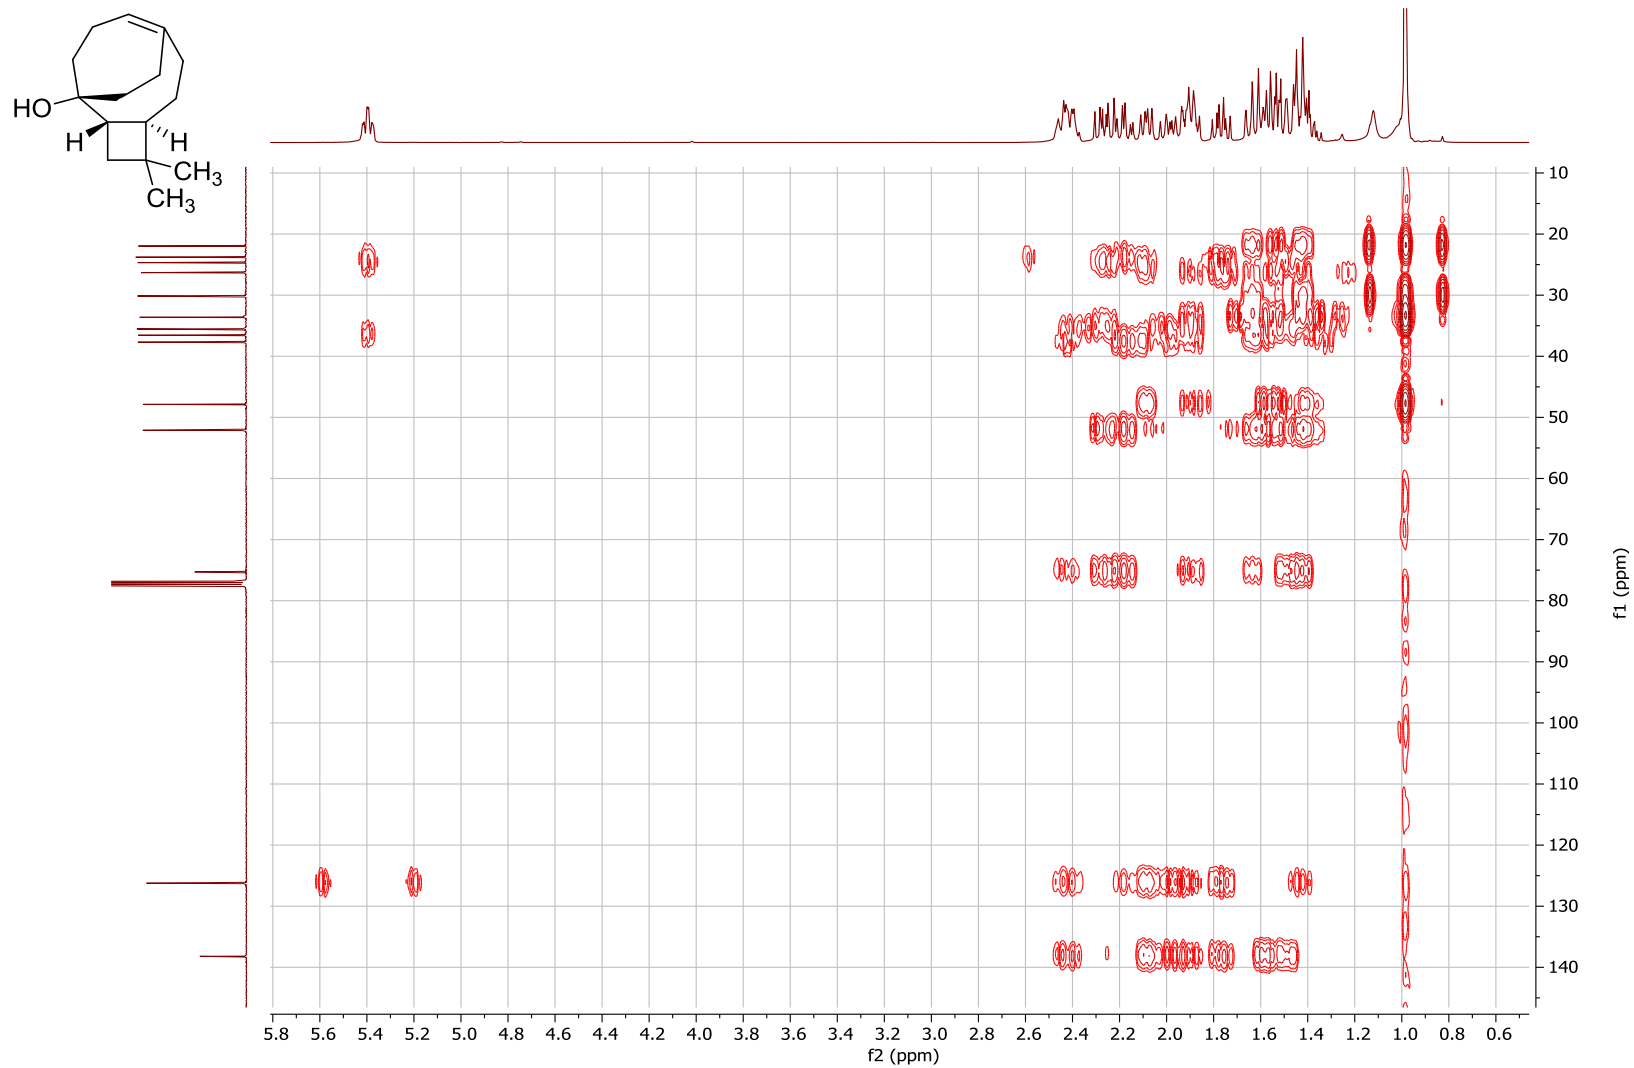



### S9. NMR of euphoranin E (2)

<sup>1</sup>H NMR (400 MHz, CDCl<sub>3</sub>) of euphoranin E (2)

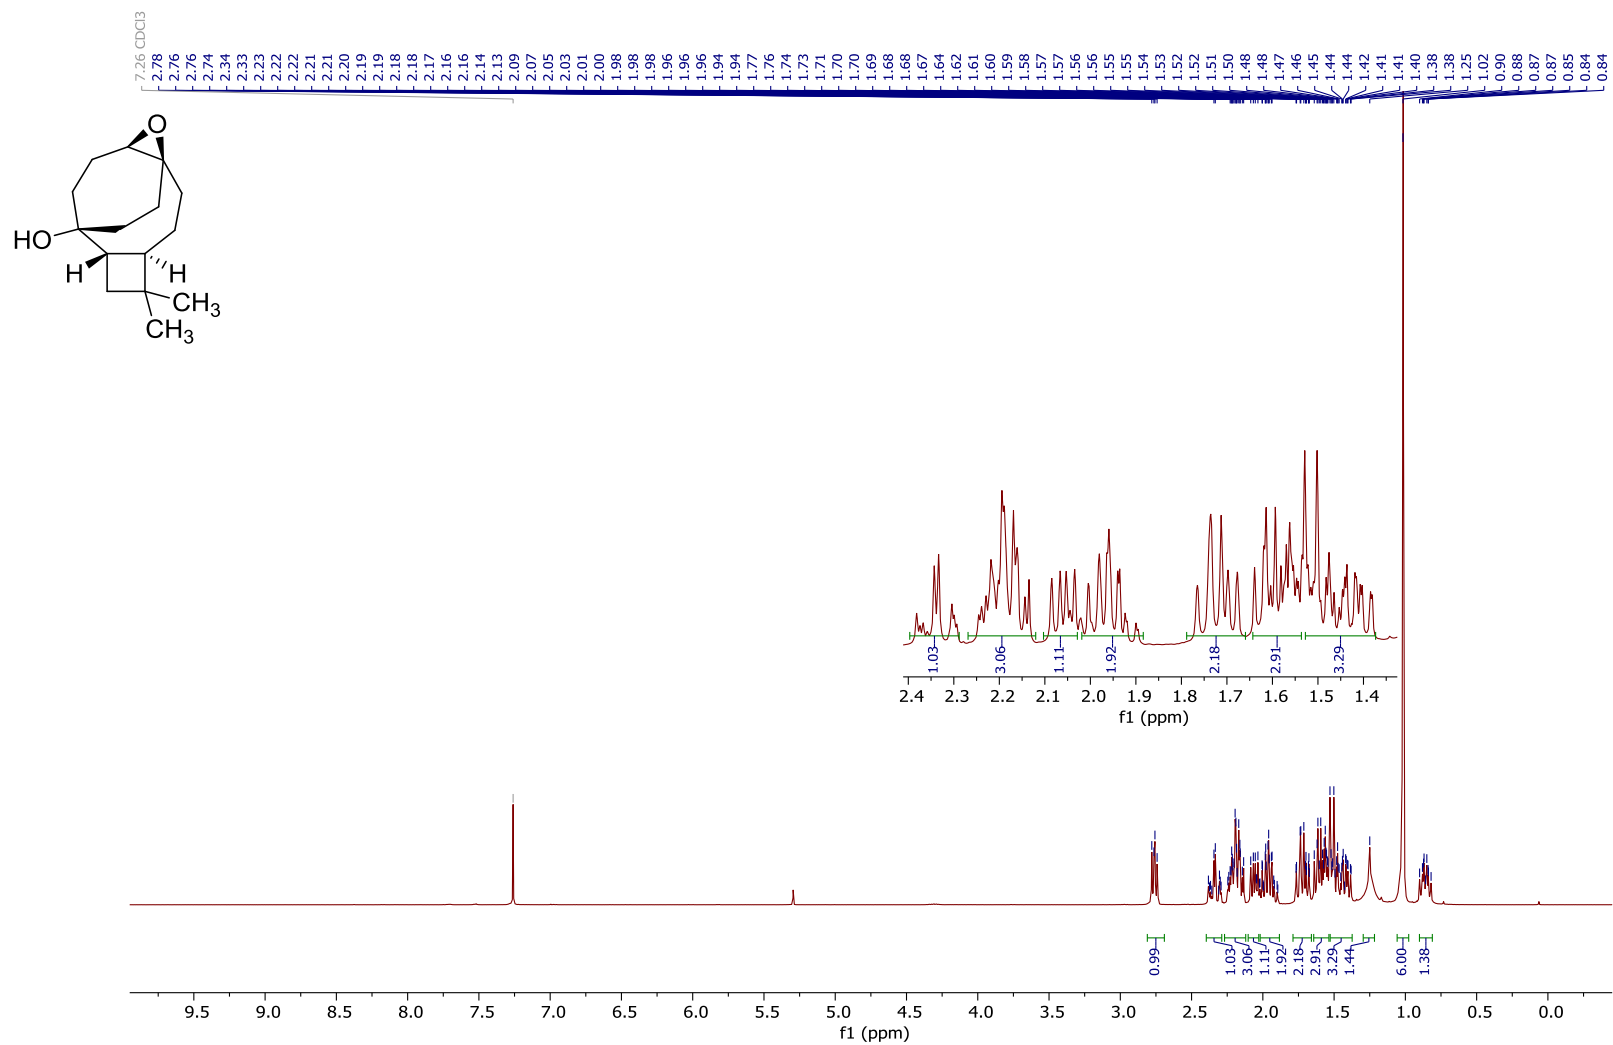

$^1\text{H}$  NMR (400 MHz,  $\text{C}_6\text{D}_6$ ) of euphoranin E (**2**)

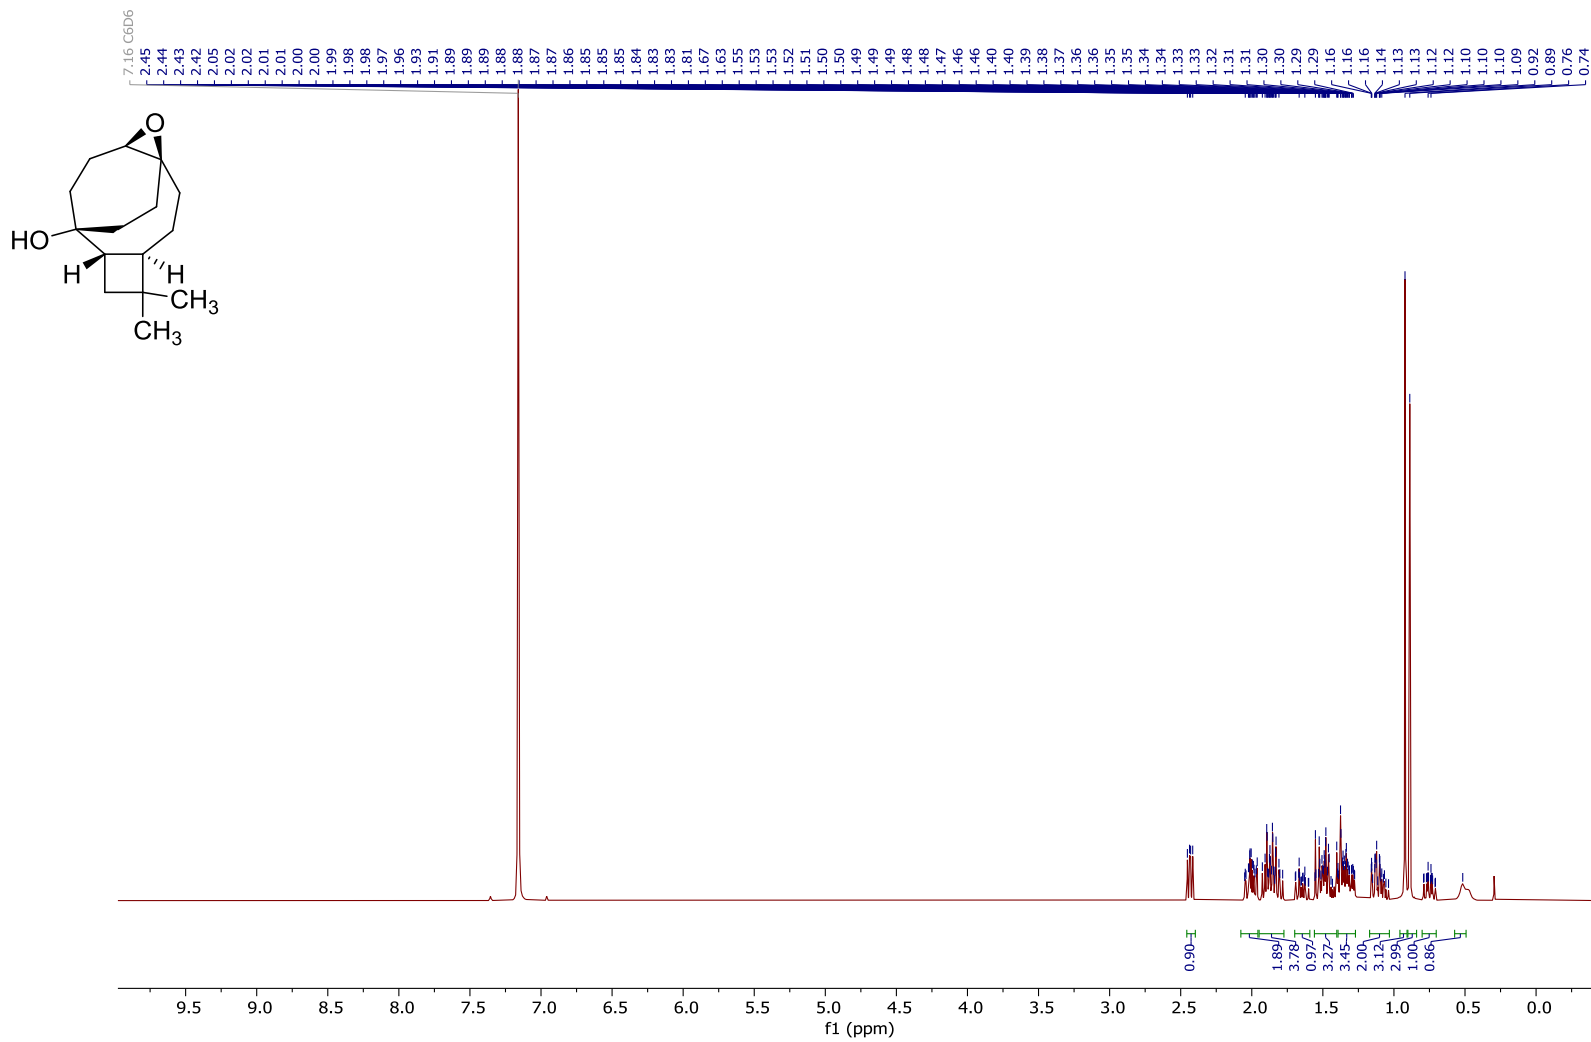

$^{13}\text{C}$  NMR (101 MHz,  $\text{CDCl}_3$ ) of euphoranin E (**2**)

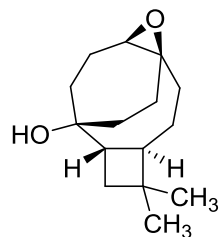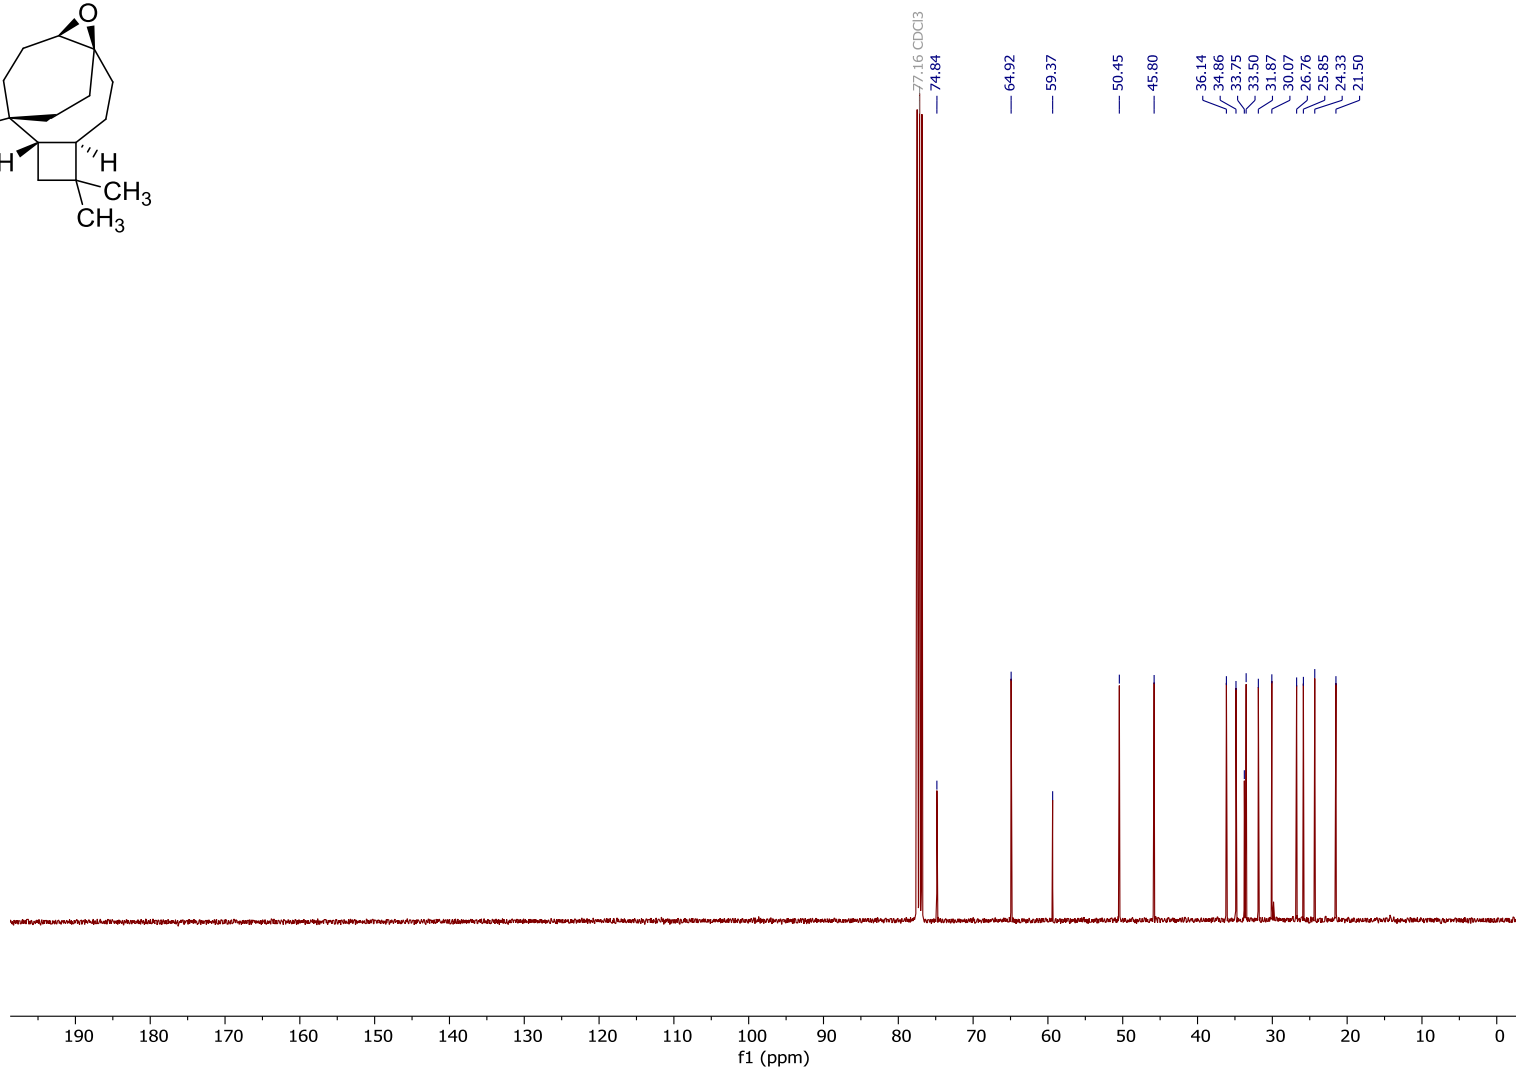

COSY of euphoranin E (2)

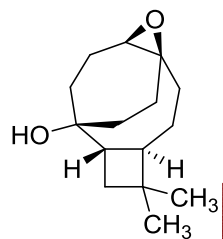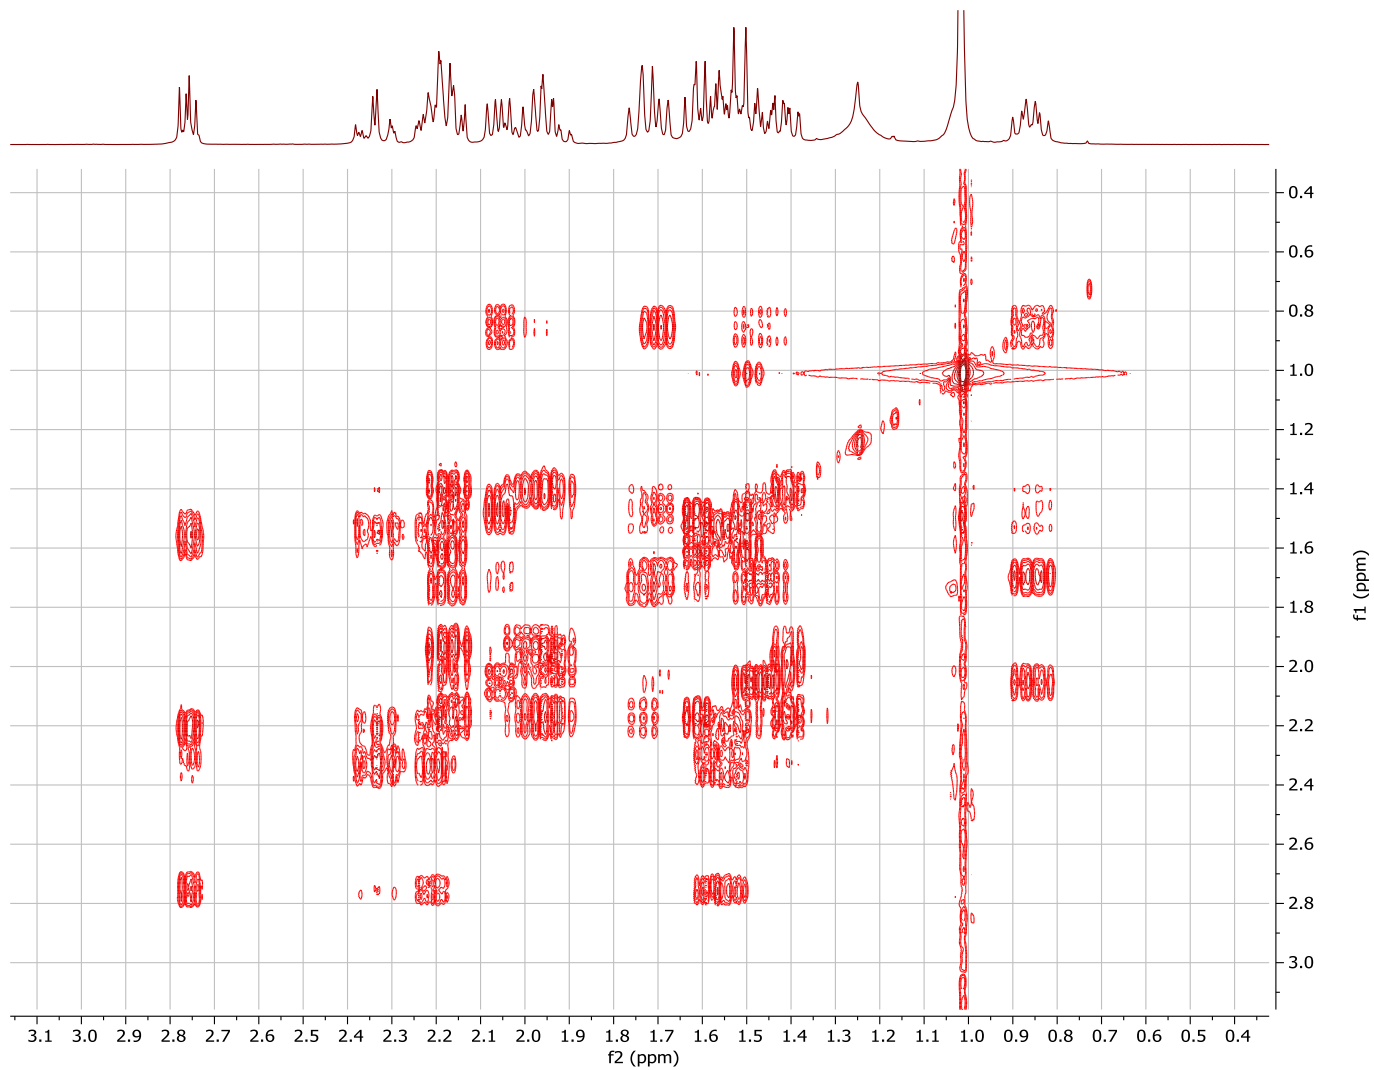

NOESY of euphoranin E (2)

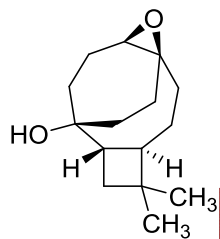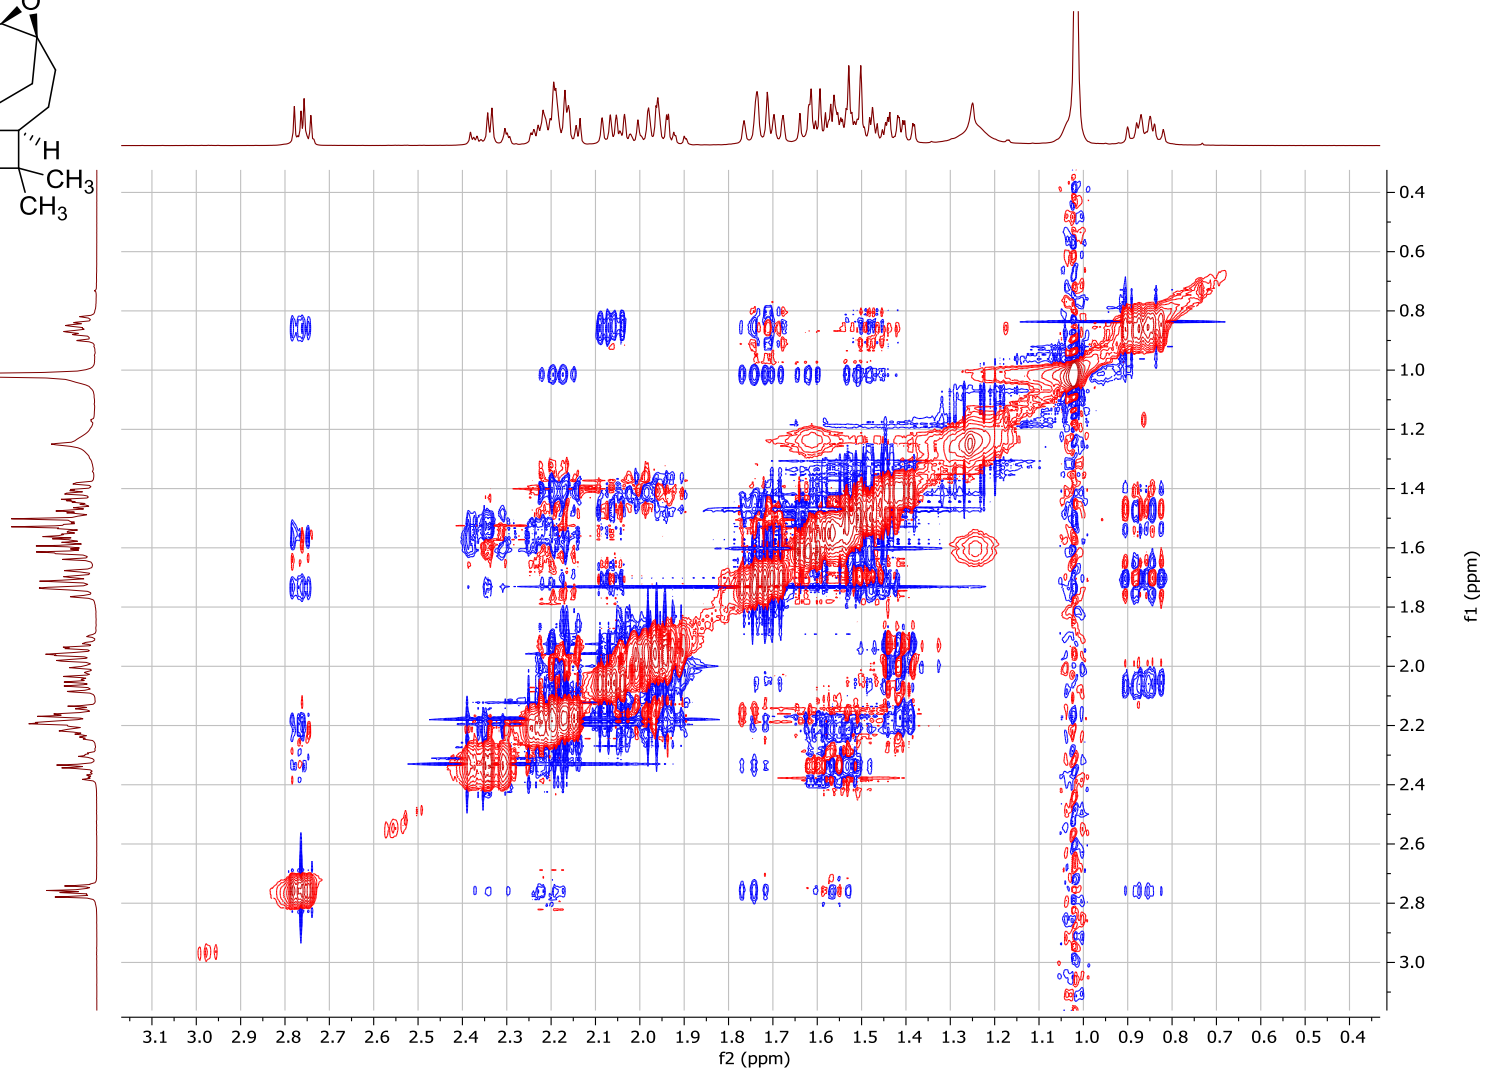

HSQC of euphoranin E (2)

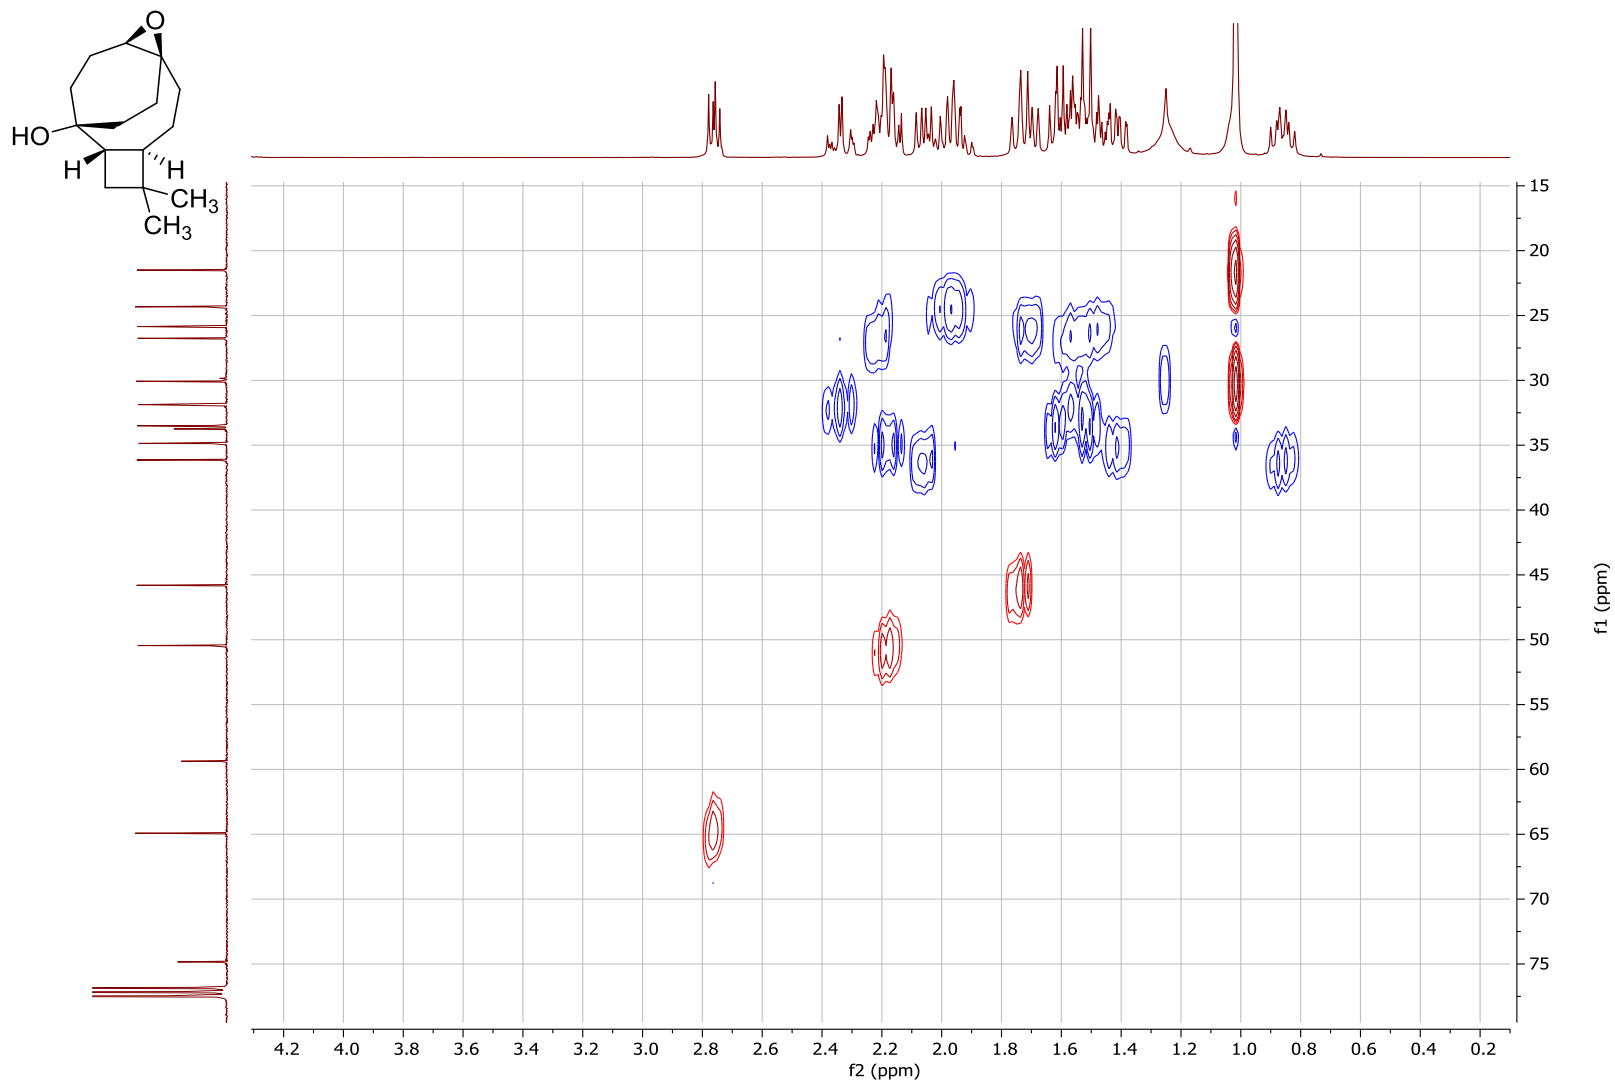

HMBC of euphoranin E (2)

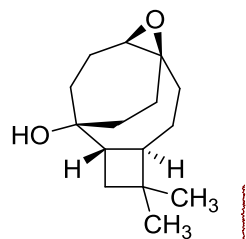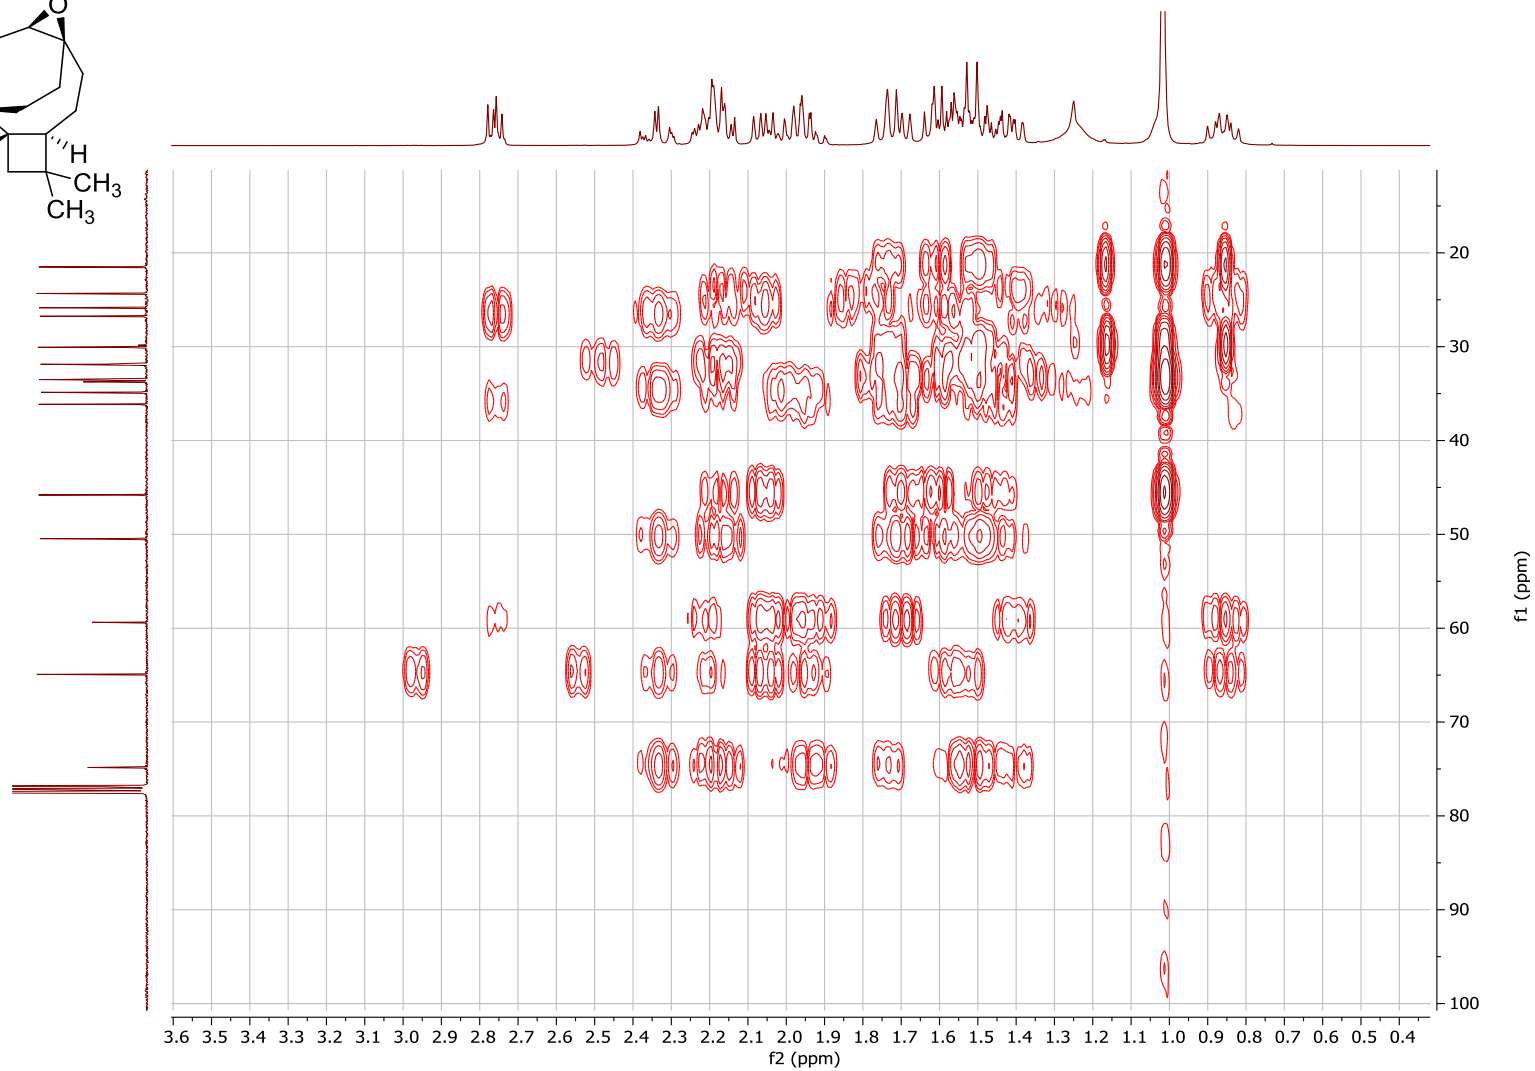

S10. NMR of *iso*-euphoranin E (11)

<sup>1</sup>H NMR (400 MHz, CDCl<sub>3</sub>) of *iso*-euphoranin E (11)

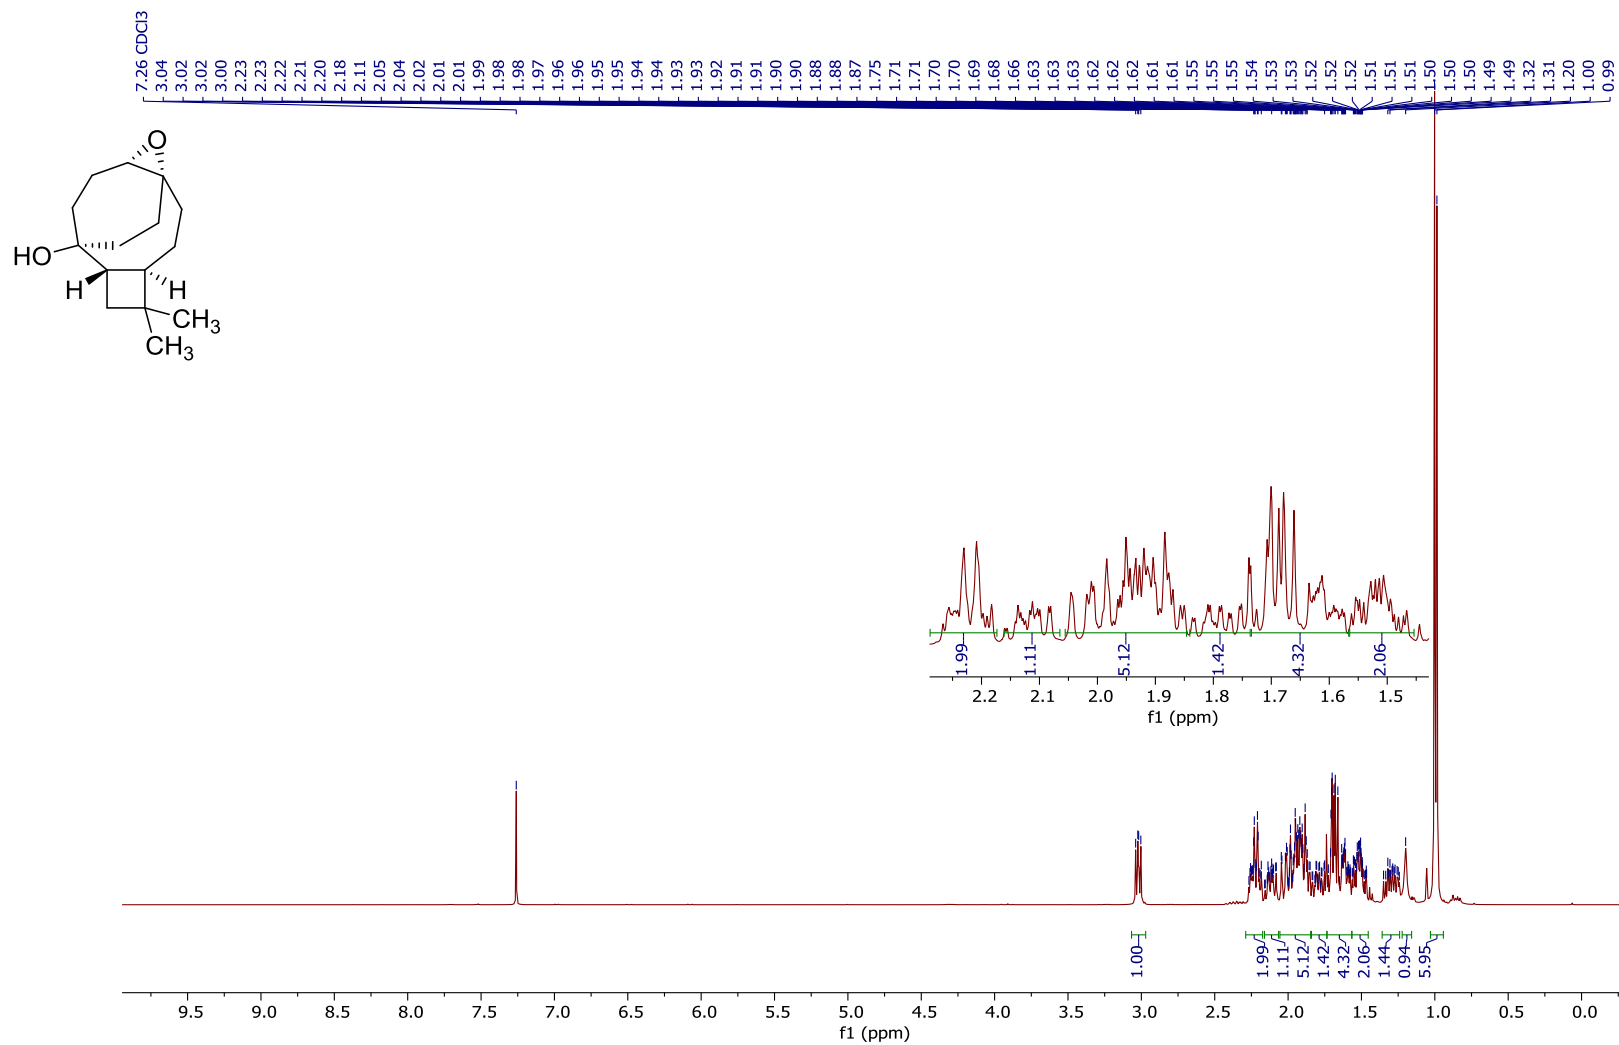



$^{13}\text{C}$  NMR (101 MHz,  $\text{CDCl}_3$ ) of *iso*-euphoranin E (**11**)

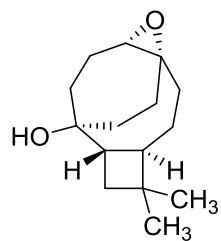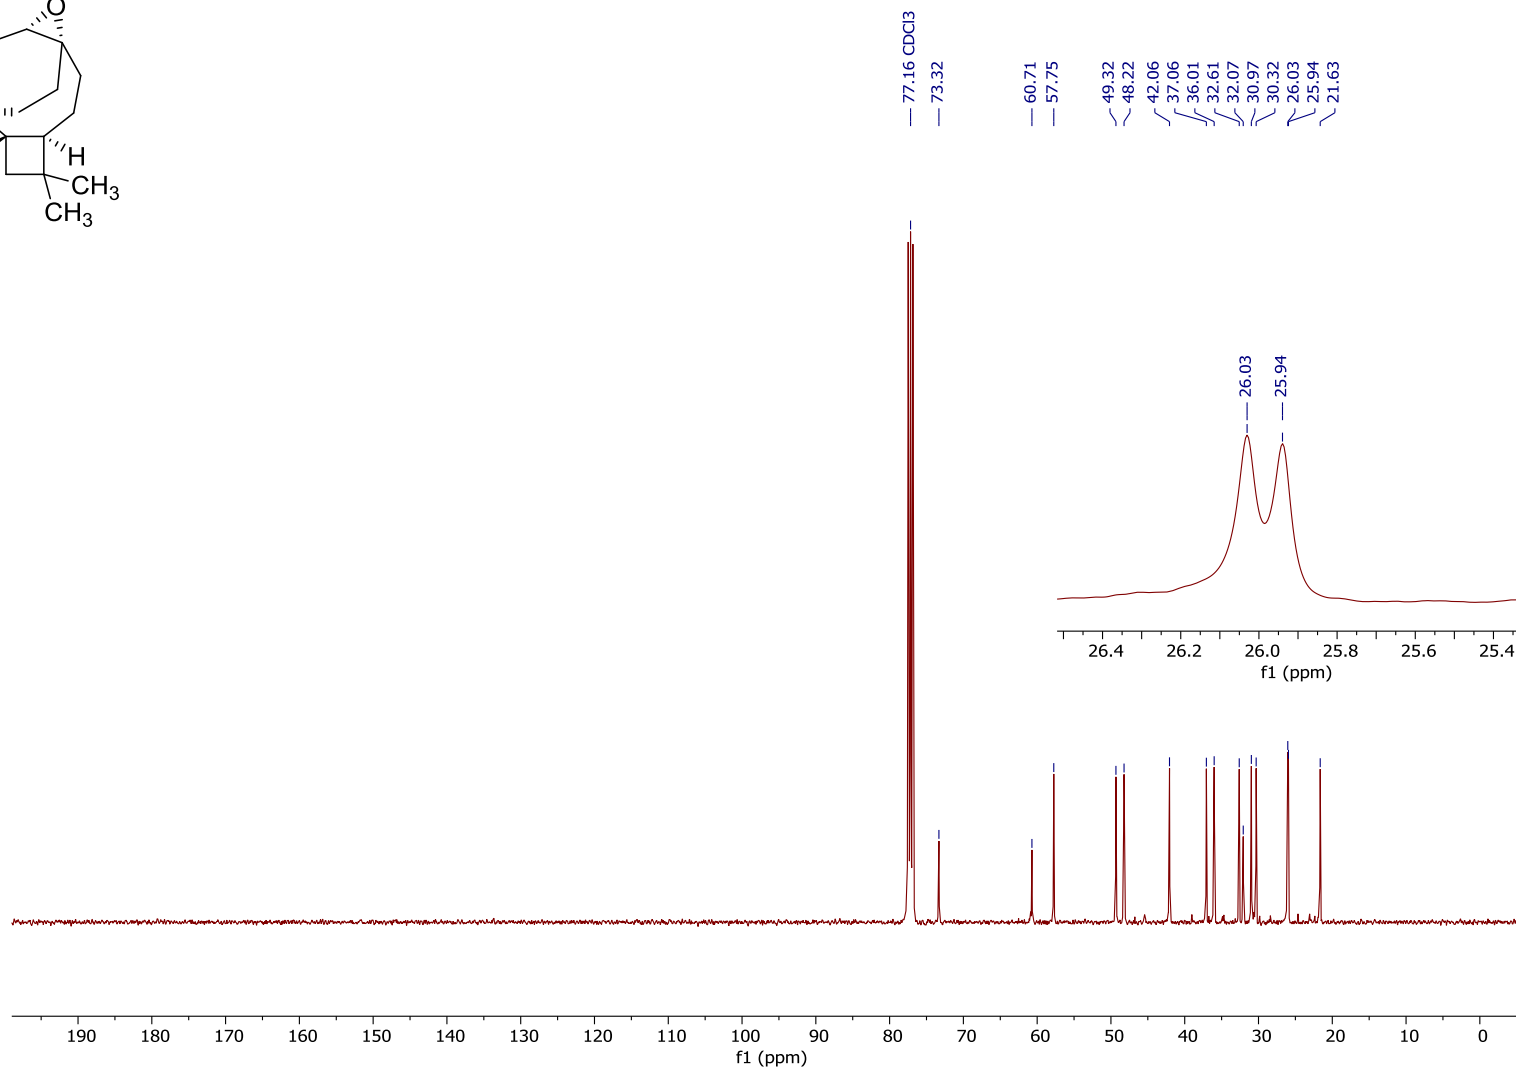

COSY of *iso*-euphoranin E (**11**)

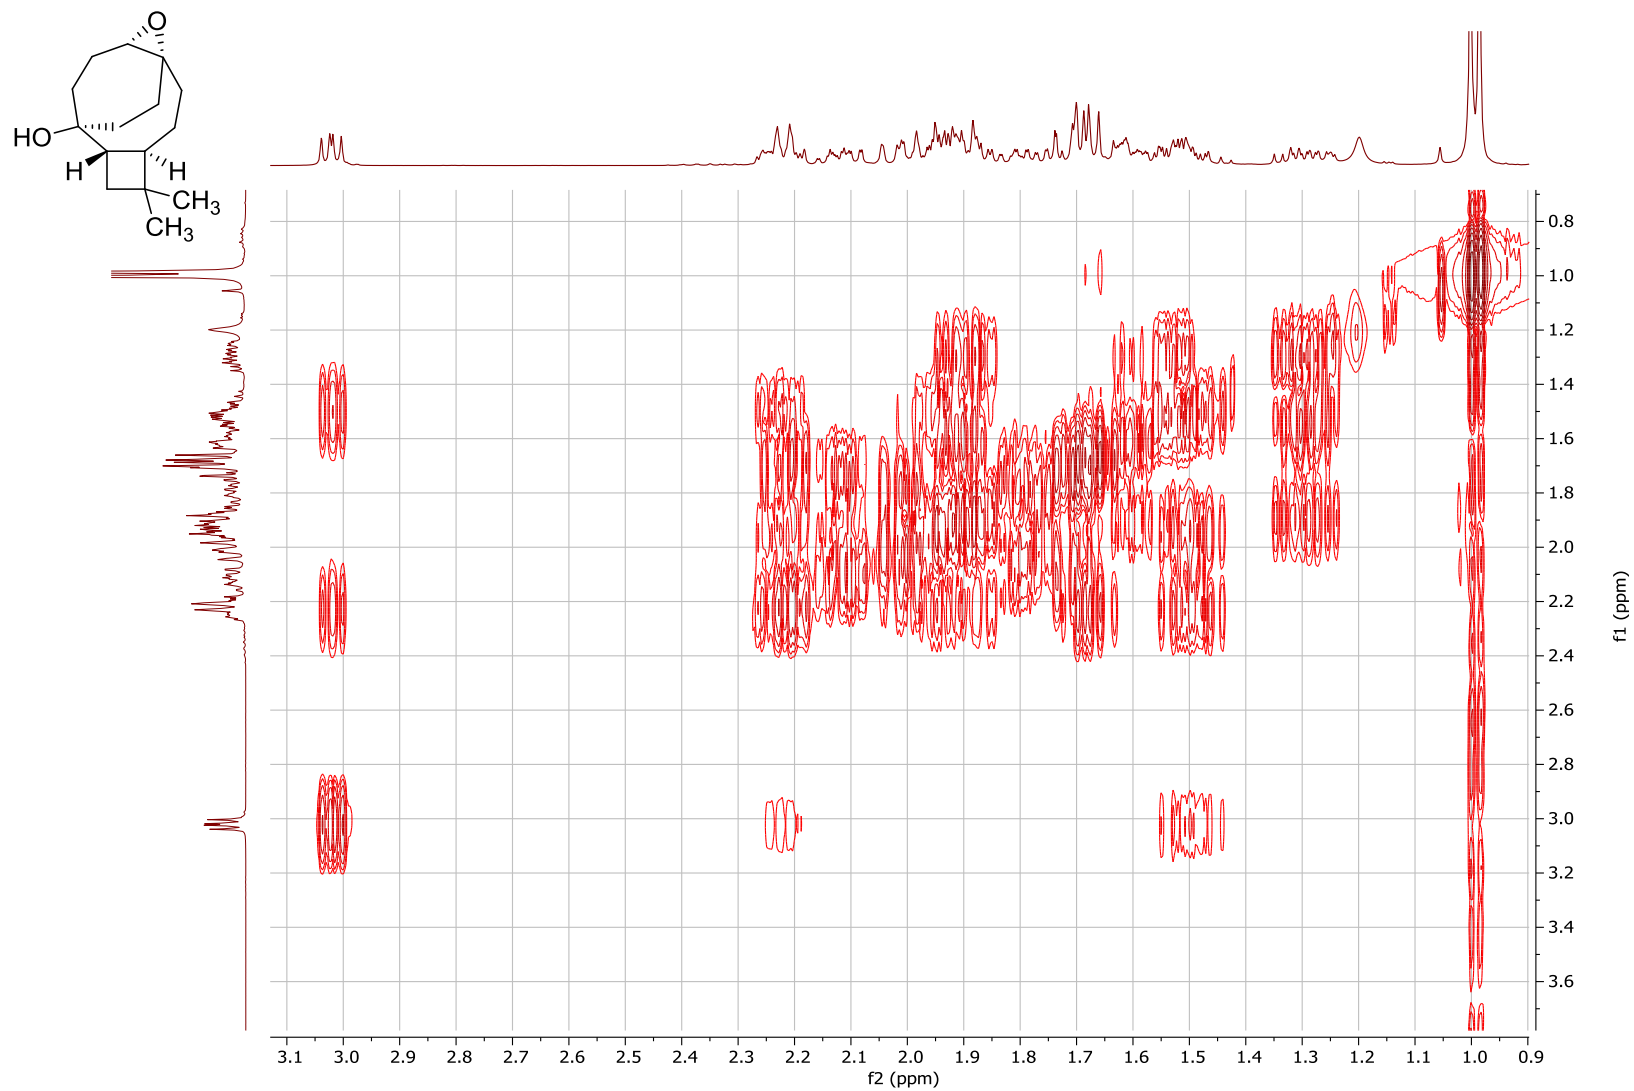

NOESY of *iso*-euphoranin E (**11**)

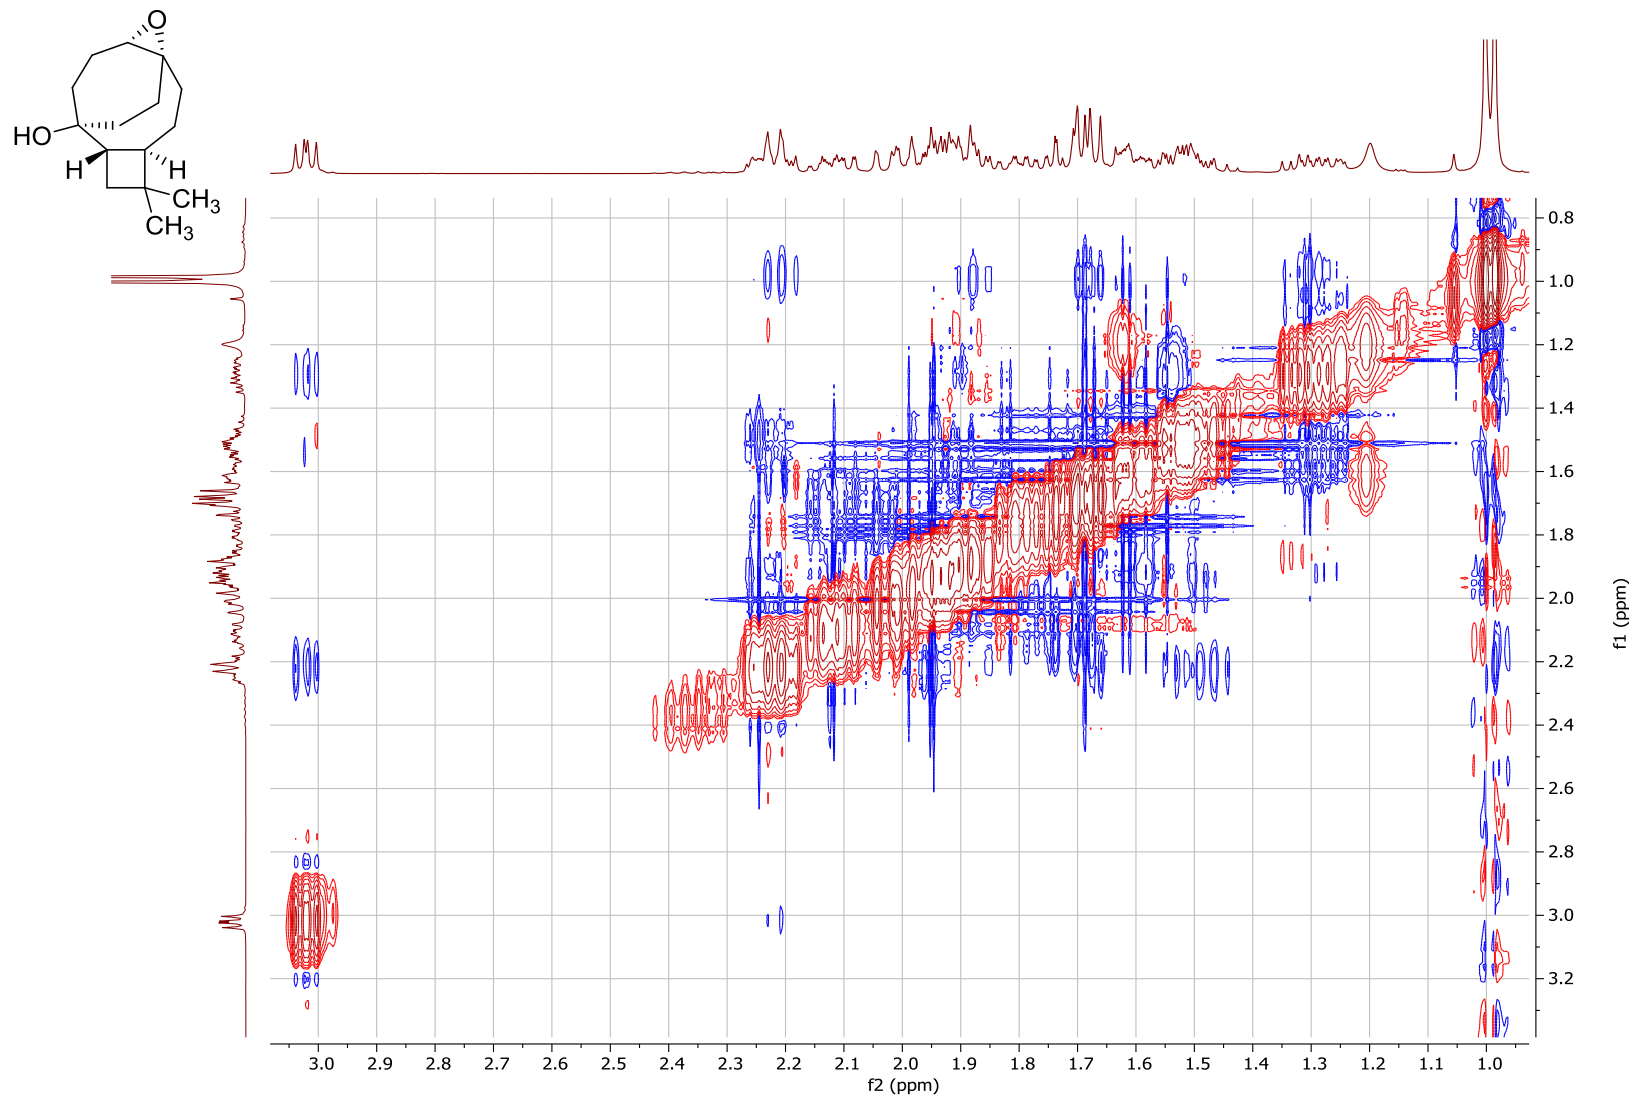

HSQC of *iso*-euphoranin E (**11**)

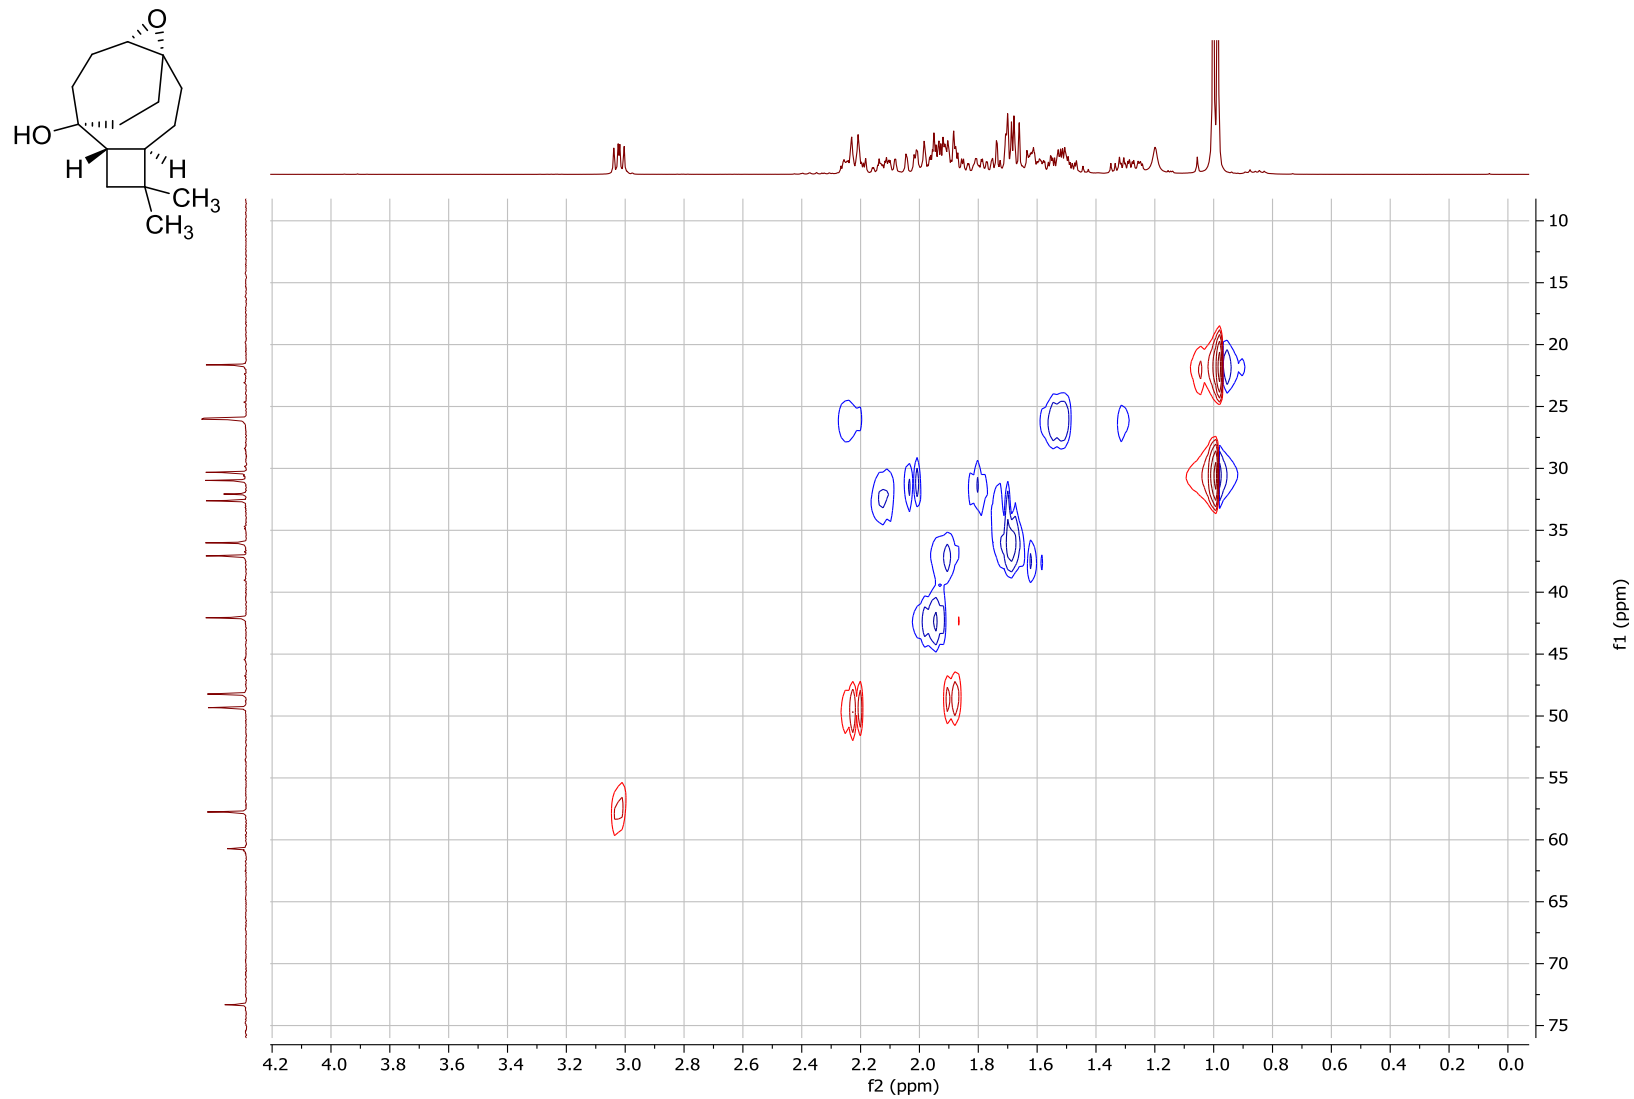

HMBC of *iso*-euphoranin E (**11**)

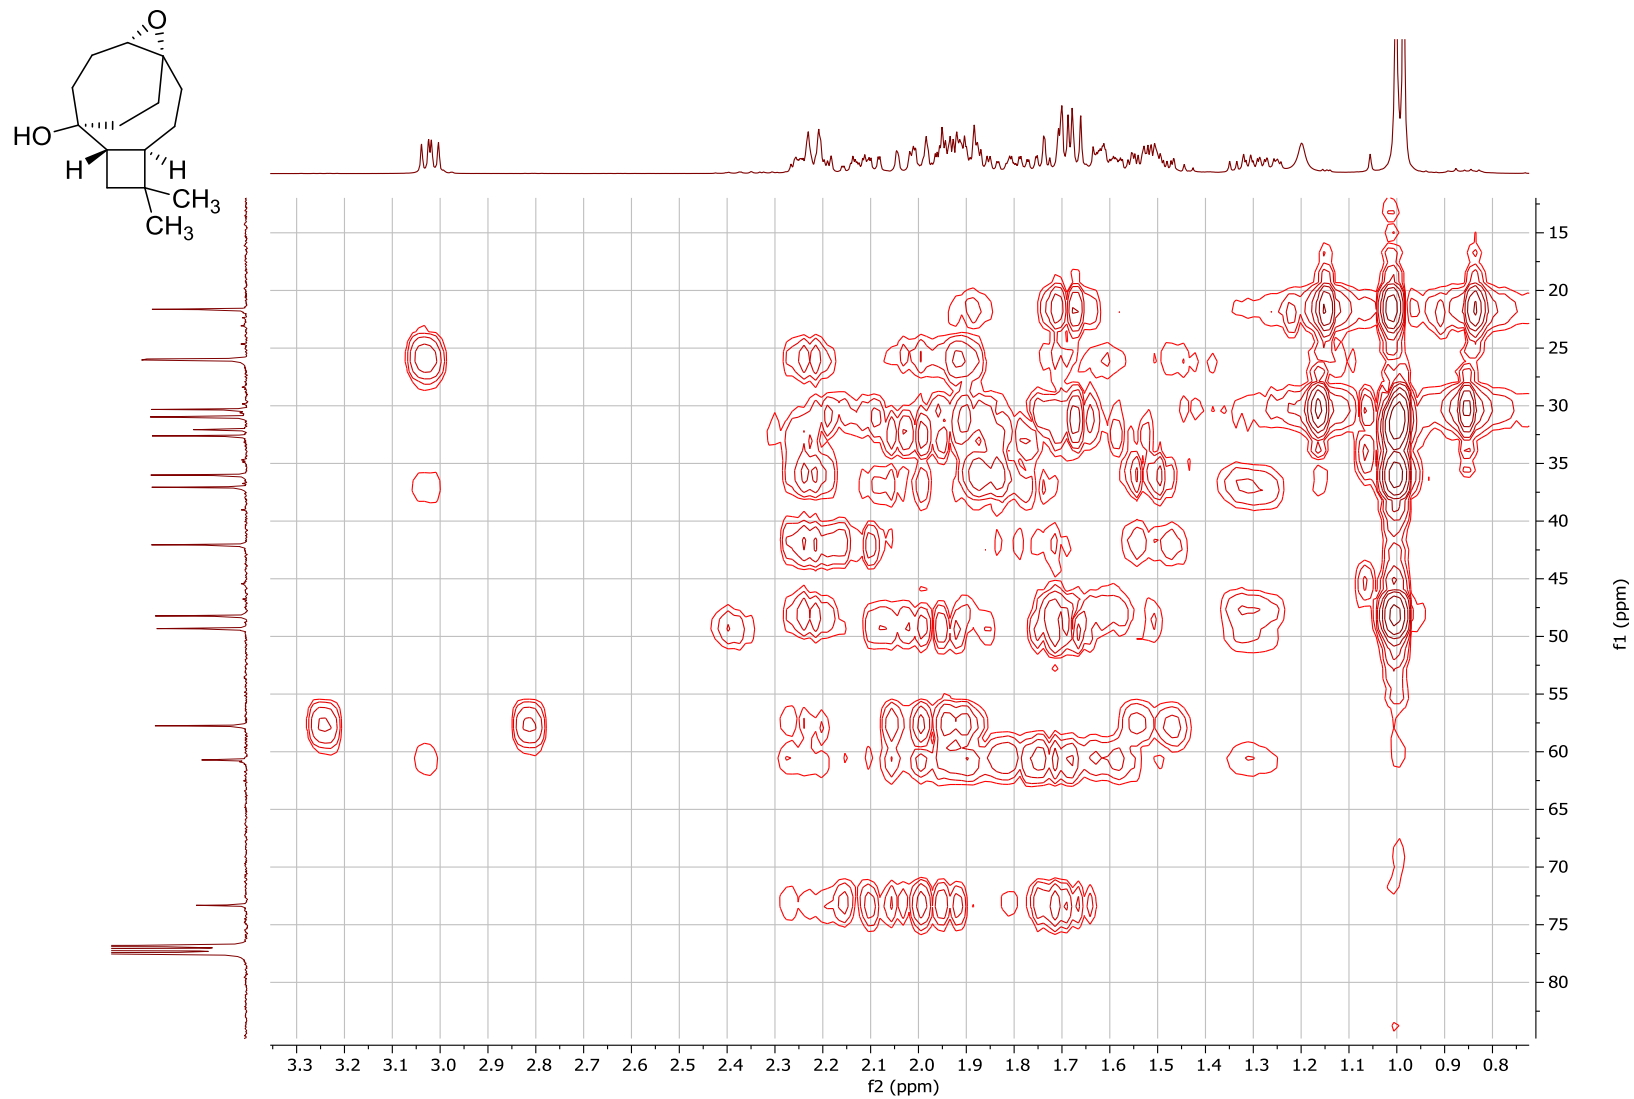

## IR spectra

IR (thin film) of (1*S*,5*R*,9*R*)-10,10-dimethyl-2,6-dimethylenebicyclo[7.2.0]undecan-5-one (**8**)

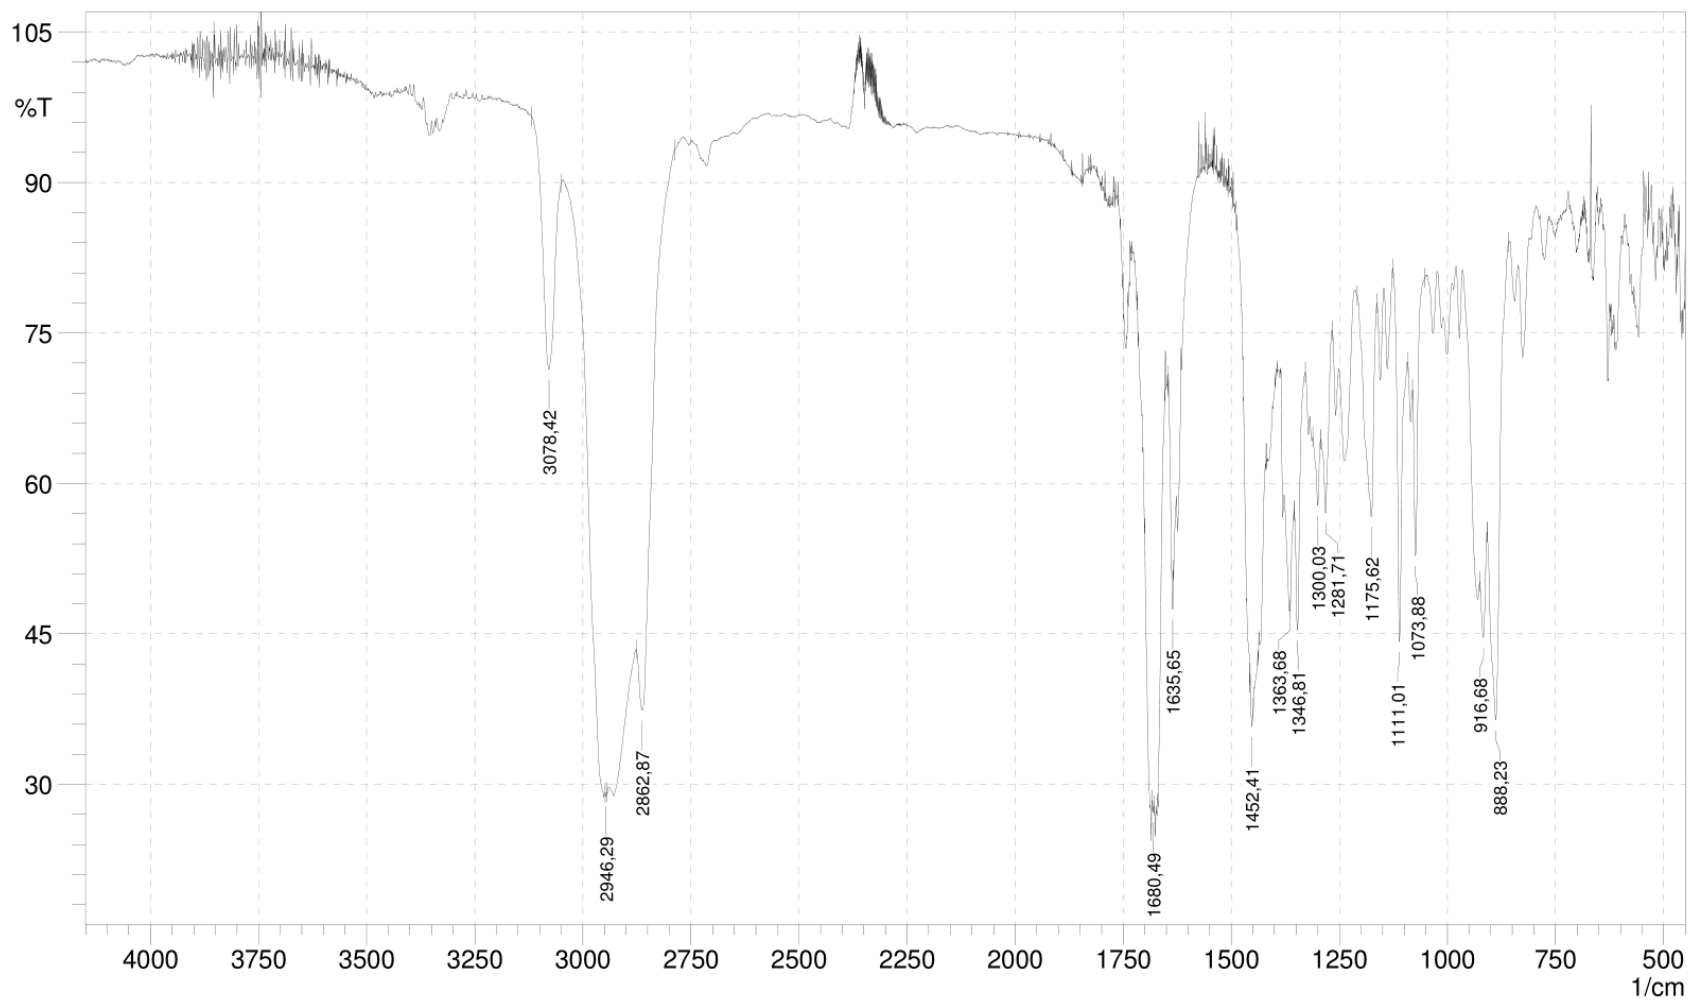

IR (thin film) of (2*aR*,4*aR*,7*aR*,7*bS*)-2,2-dimethyloctahydro-5*H*-4*a*,7*a*-ethanocyclobuta[*e*]inden-5-one (**12**)

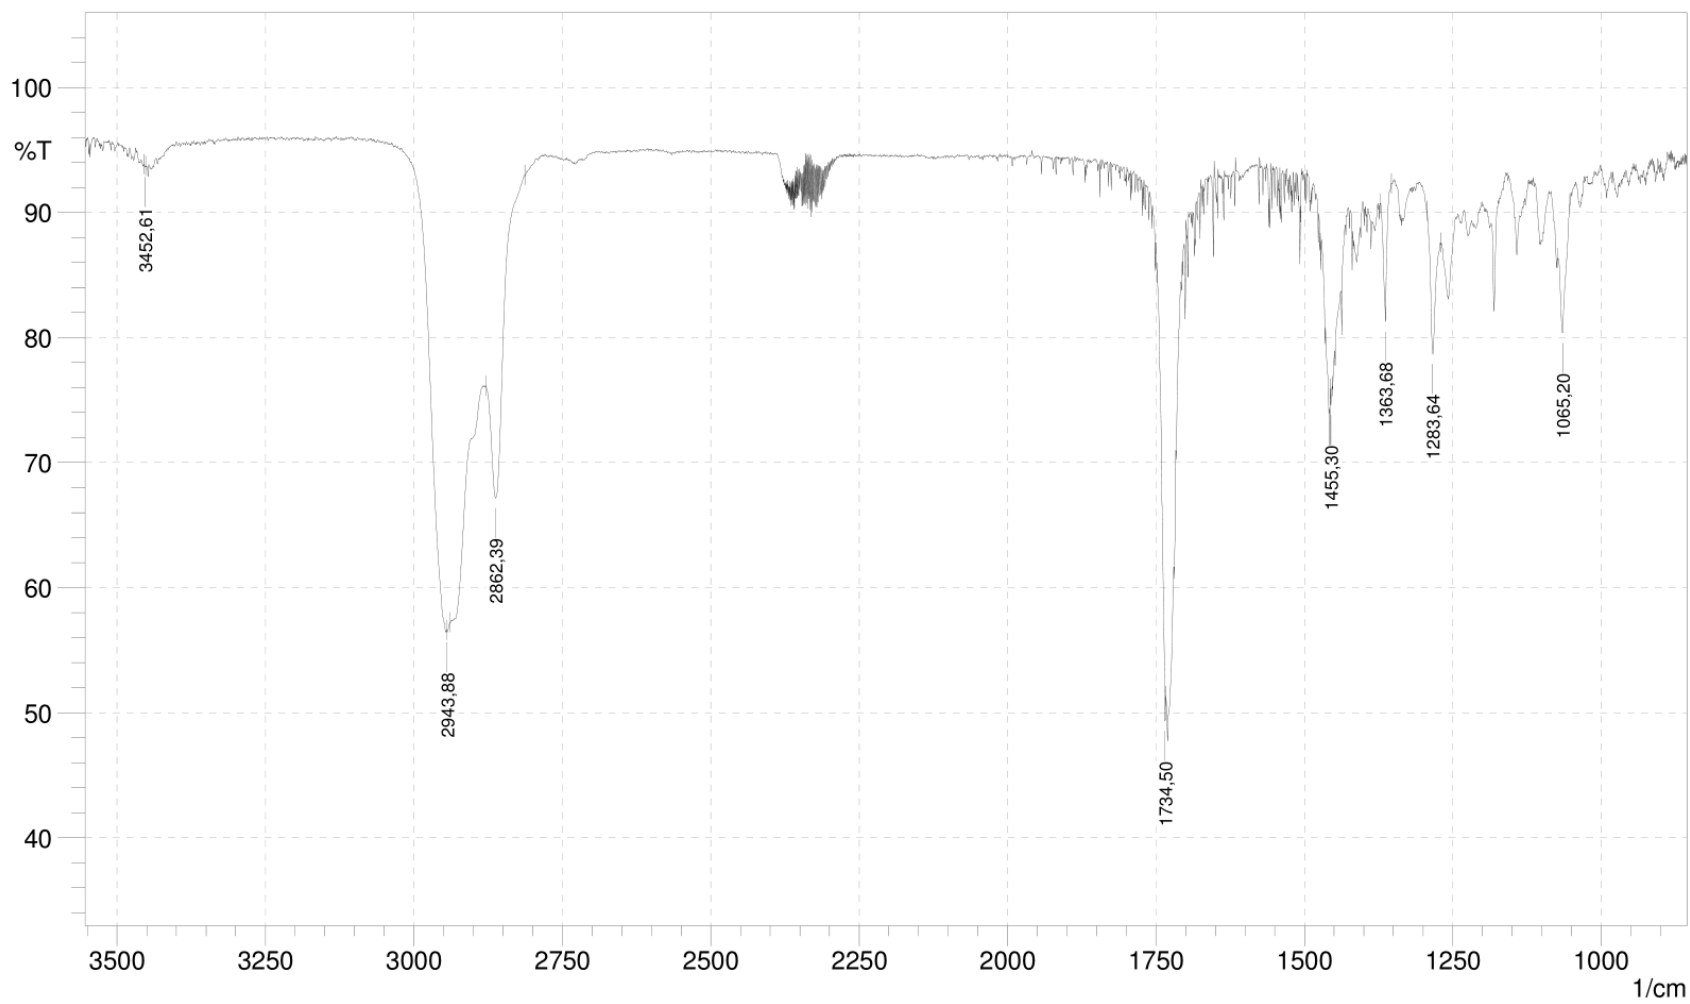

IR (thin film) of (2*aR*,4*aR*,7*aR*,7*bS*)-2,2-dimethyloctahydro-5*H*-4*a*,7*a*-ethanocyclobuta[*e*]inden-5-ol (**9**)

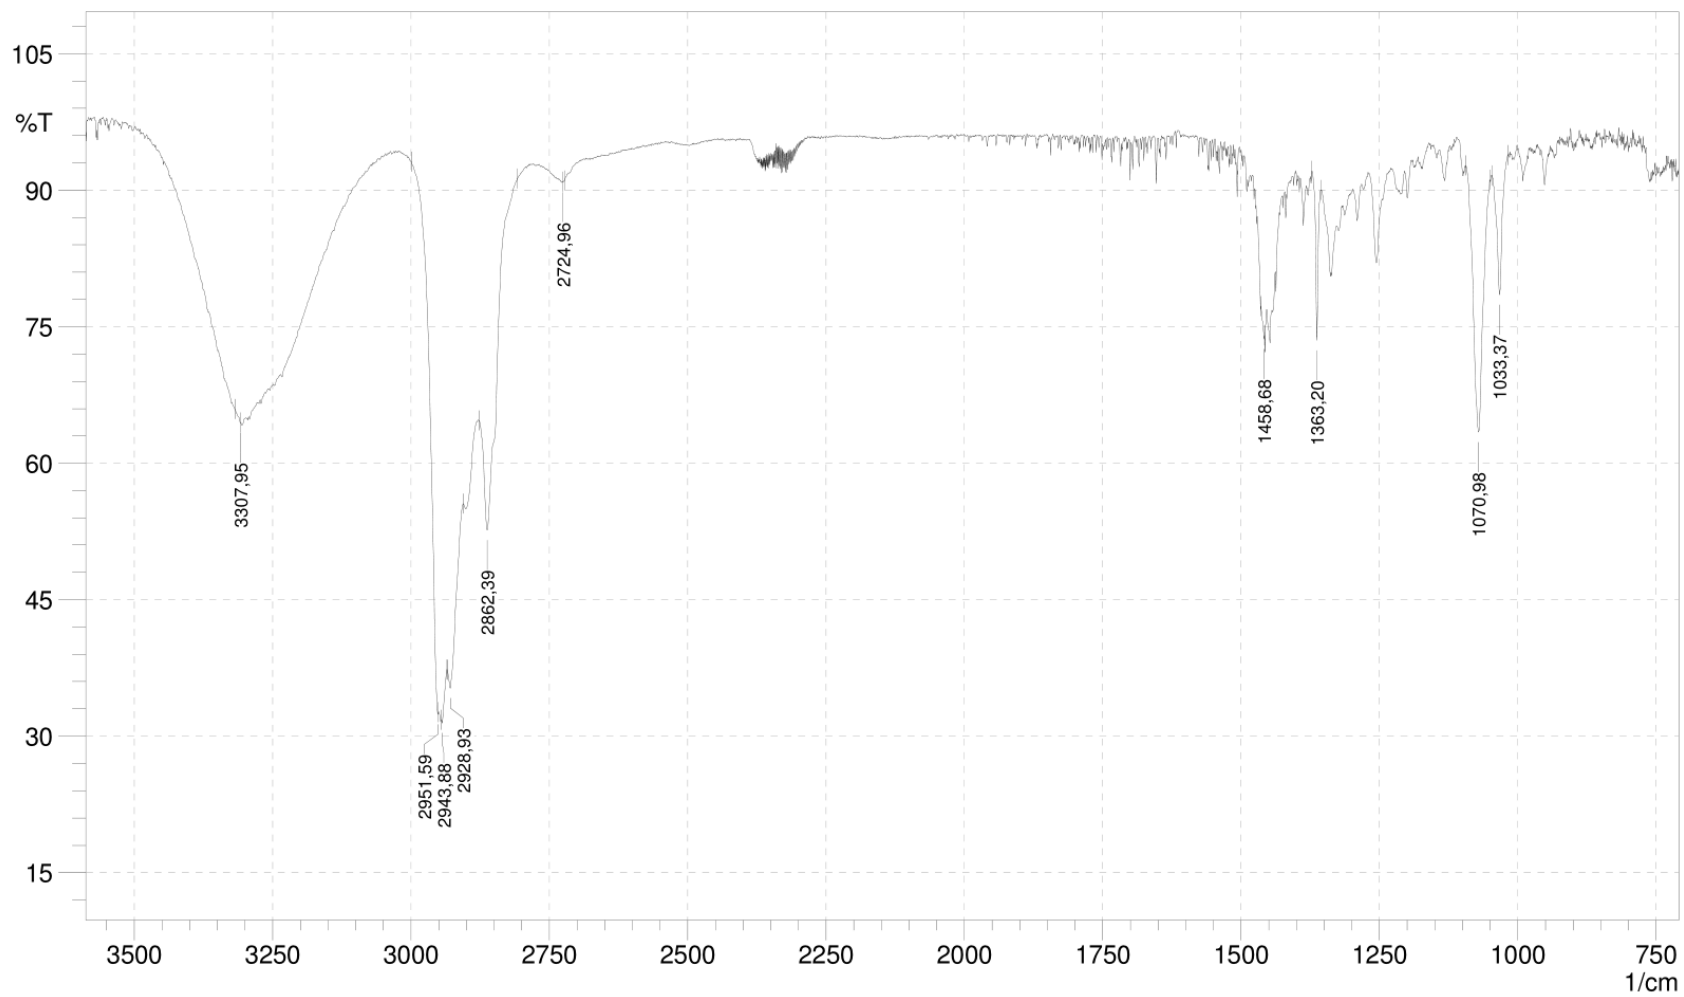



IR (thin film) of (2*aR*,4*aR*,5*S*,7*aR*,7*bS*)-2,2-dimethyloctahydro-5*H*-4*a*,7*a*-ethanocyclobuta[*e*]inden-5-yl 4-nitrobenzoate (**13**)

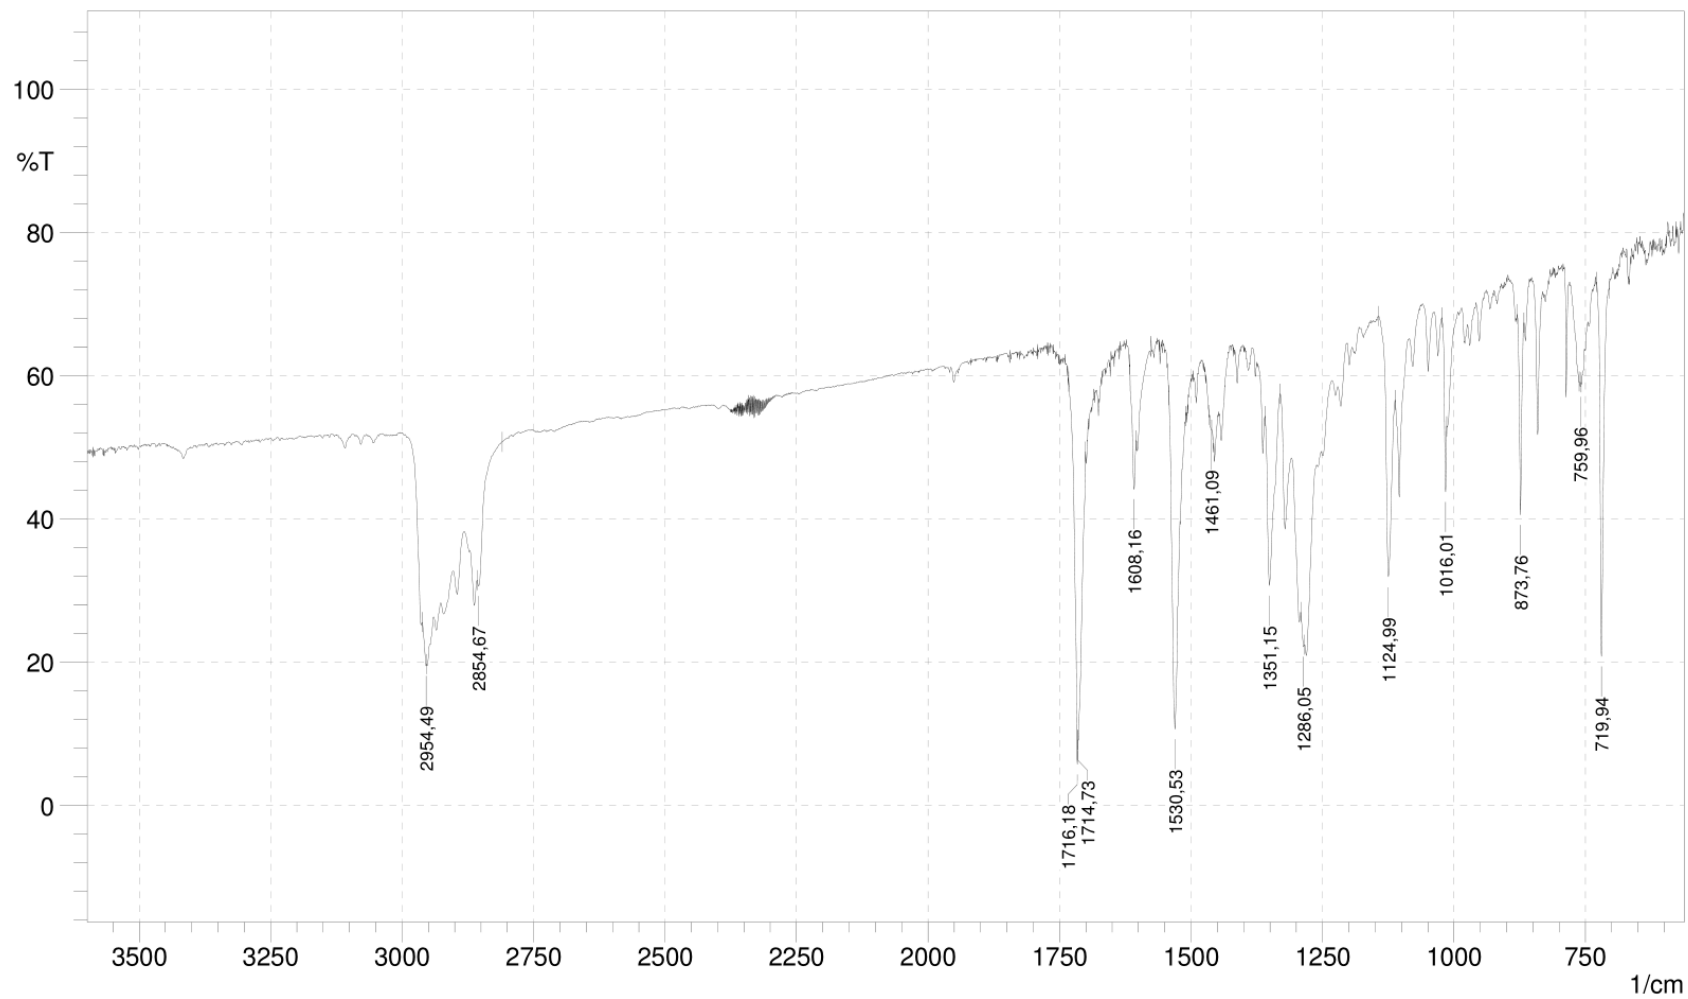

IR (thin film) of (2a*R*,4a*R*,5*S*,7a*R*,7b*S*)-2,2-dimethyloctahydro-5*H*-4a,7a-ethanocyclobuta[*e*]inden-5-yl 4-methanesulfonate (**14**)

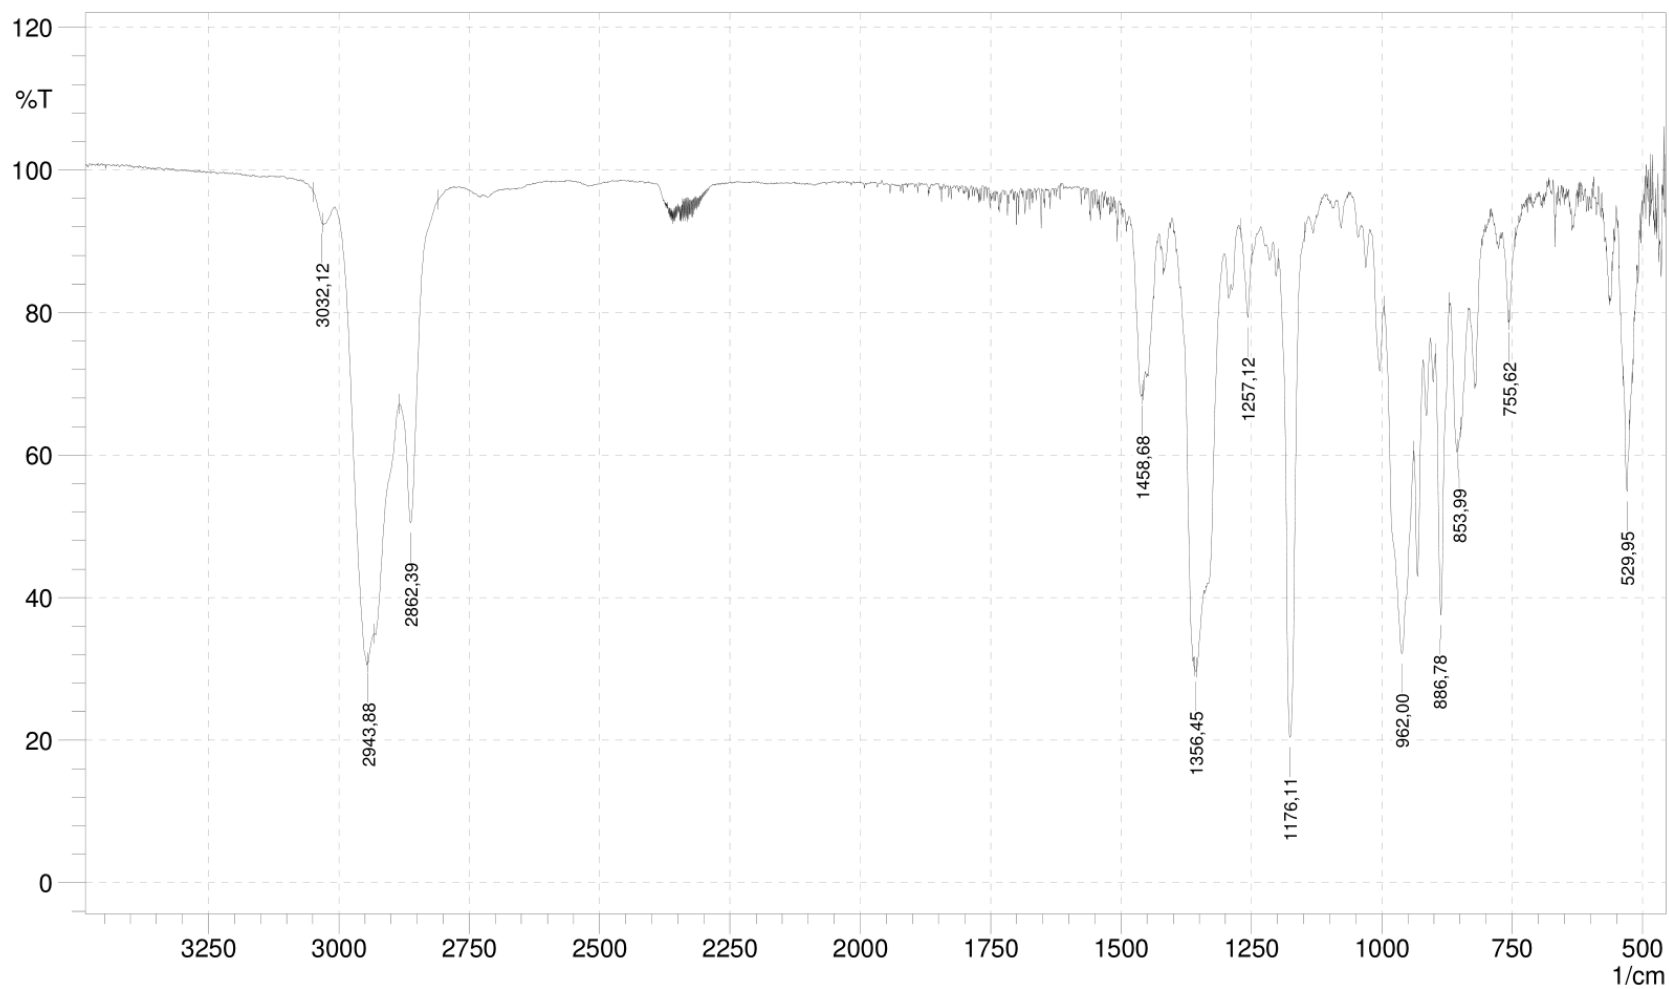

IR (thin film) of (1*R*,2*S*,5*R*)-4,4-dimethyltricyclo[6.3.2.0<sup>2,5</sup>]tridec-8-en-1-ol (**10**)

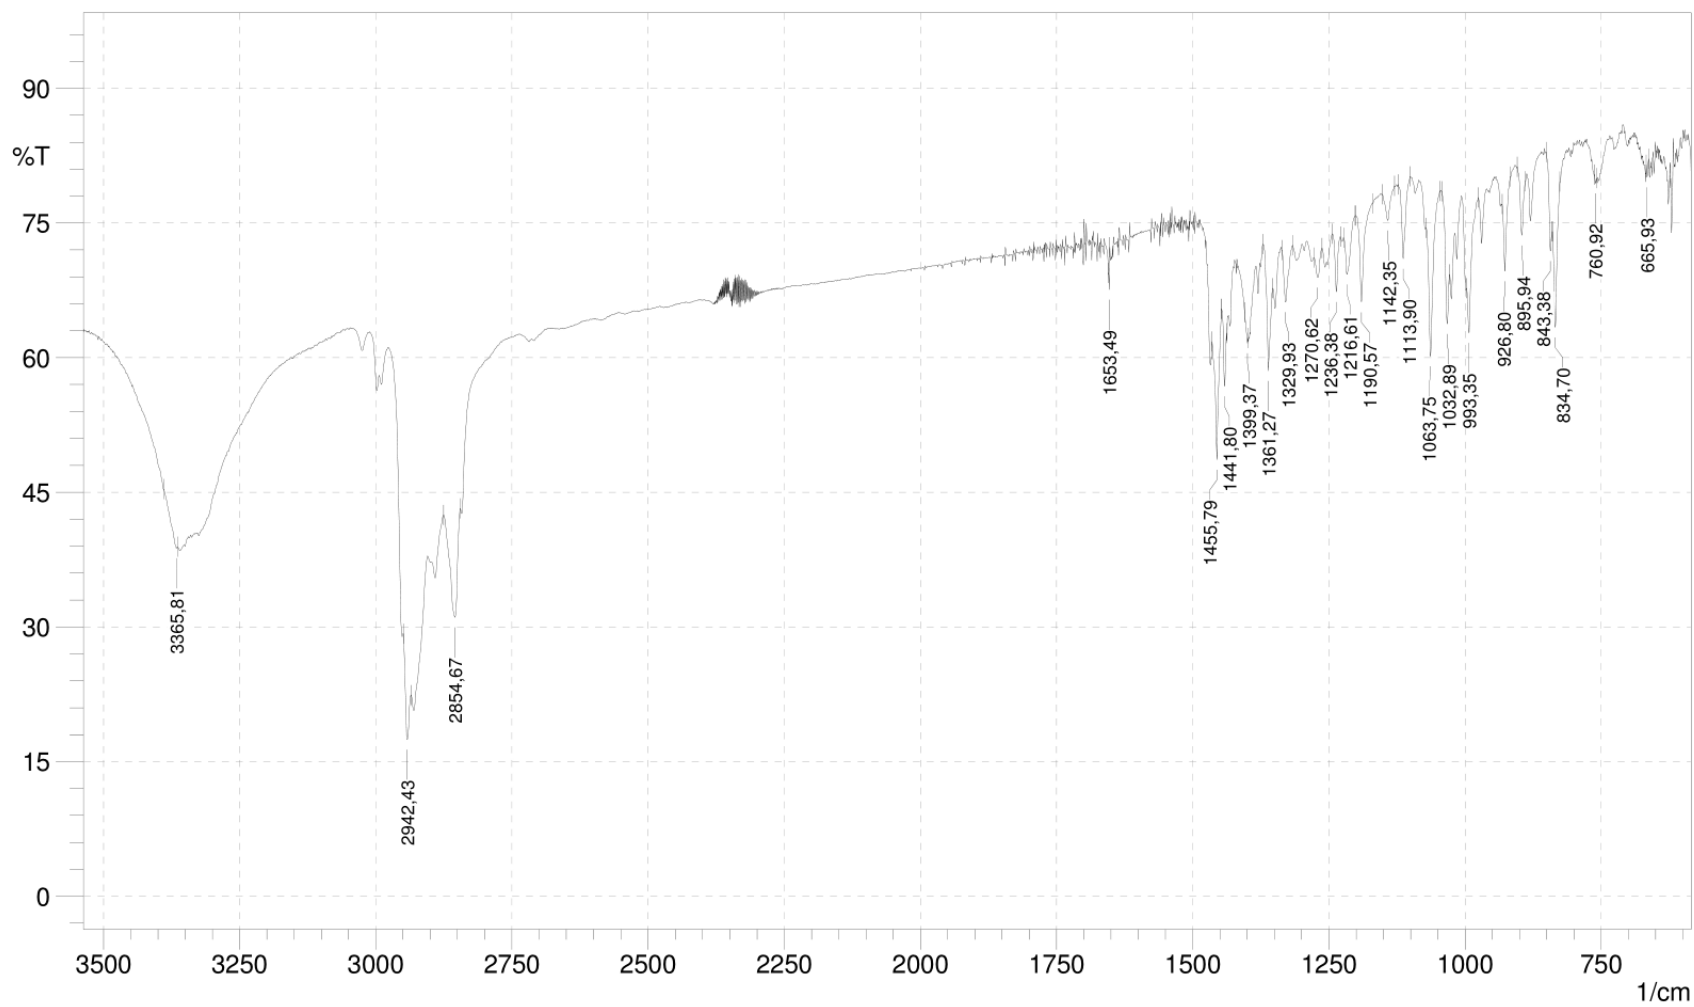

IR (thin film) of (1*S*,2*S*,5*R*)-4,4-dimethyltricyclo[6.3.2.0<sup>2,5</sup>]tridec-8-en-1-ol (**7**)

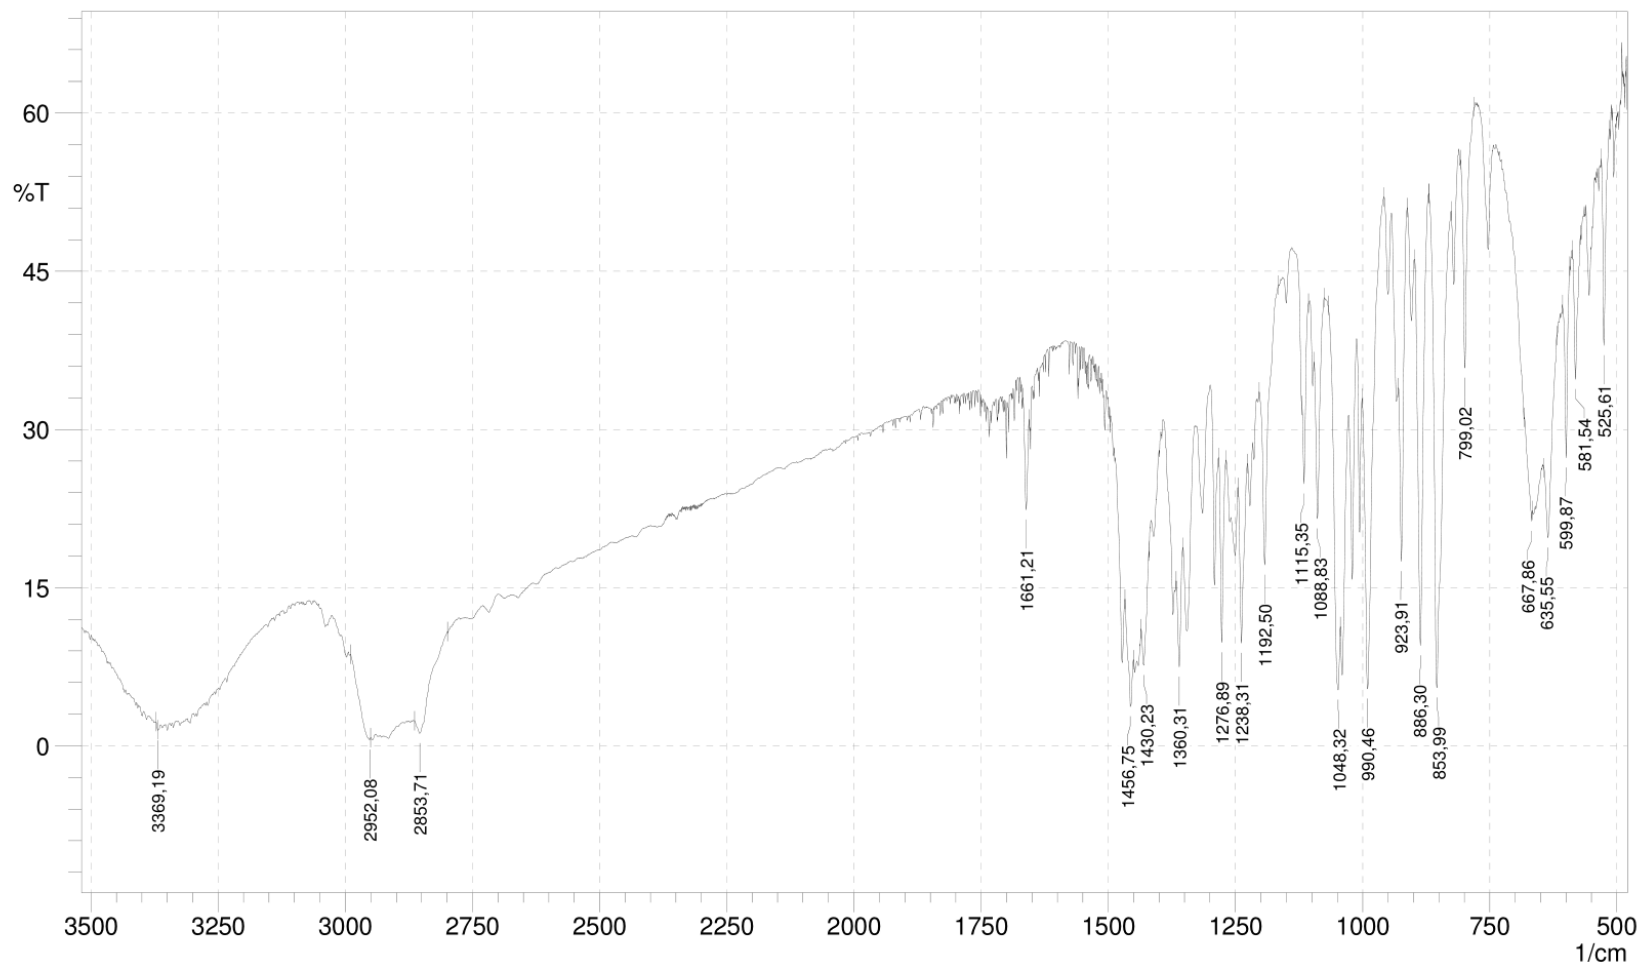

IR (thin film) of euphoranin E (2)

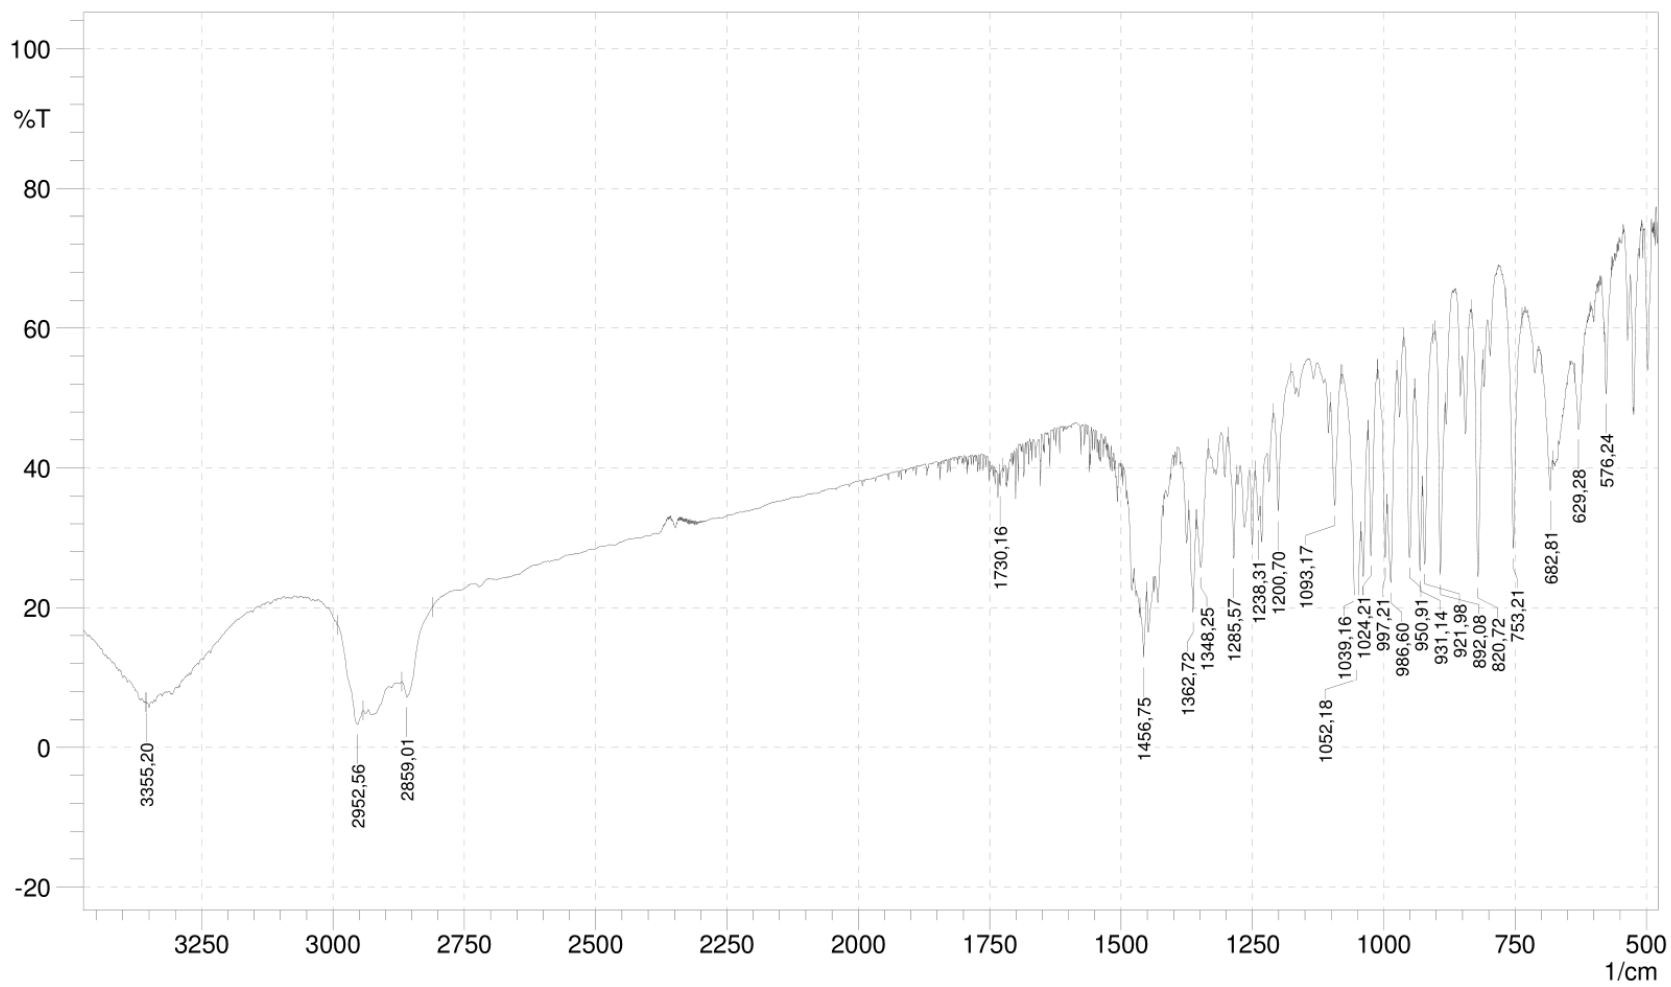

IR (thin film) of *iso*-euphoranin E (**11**)

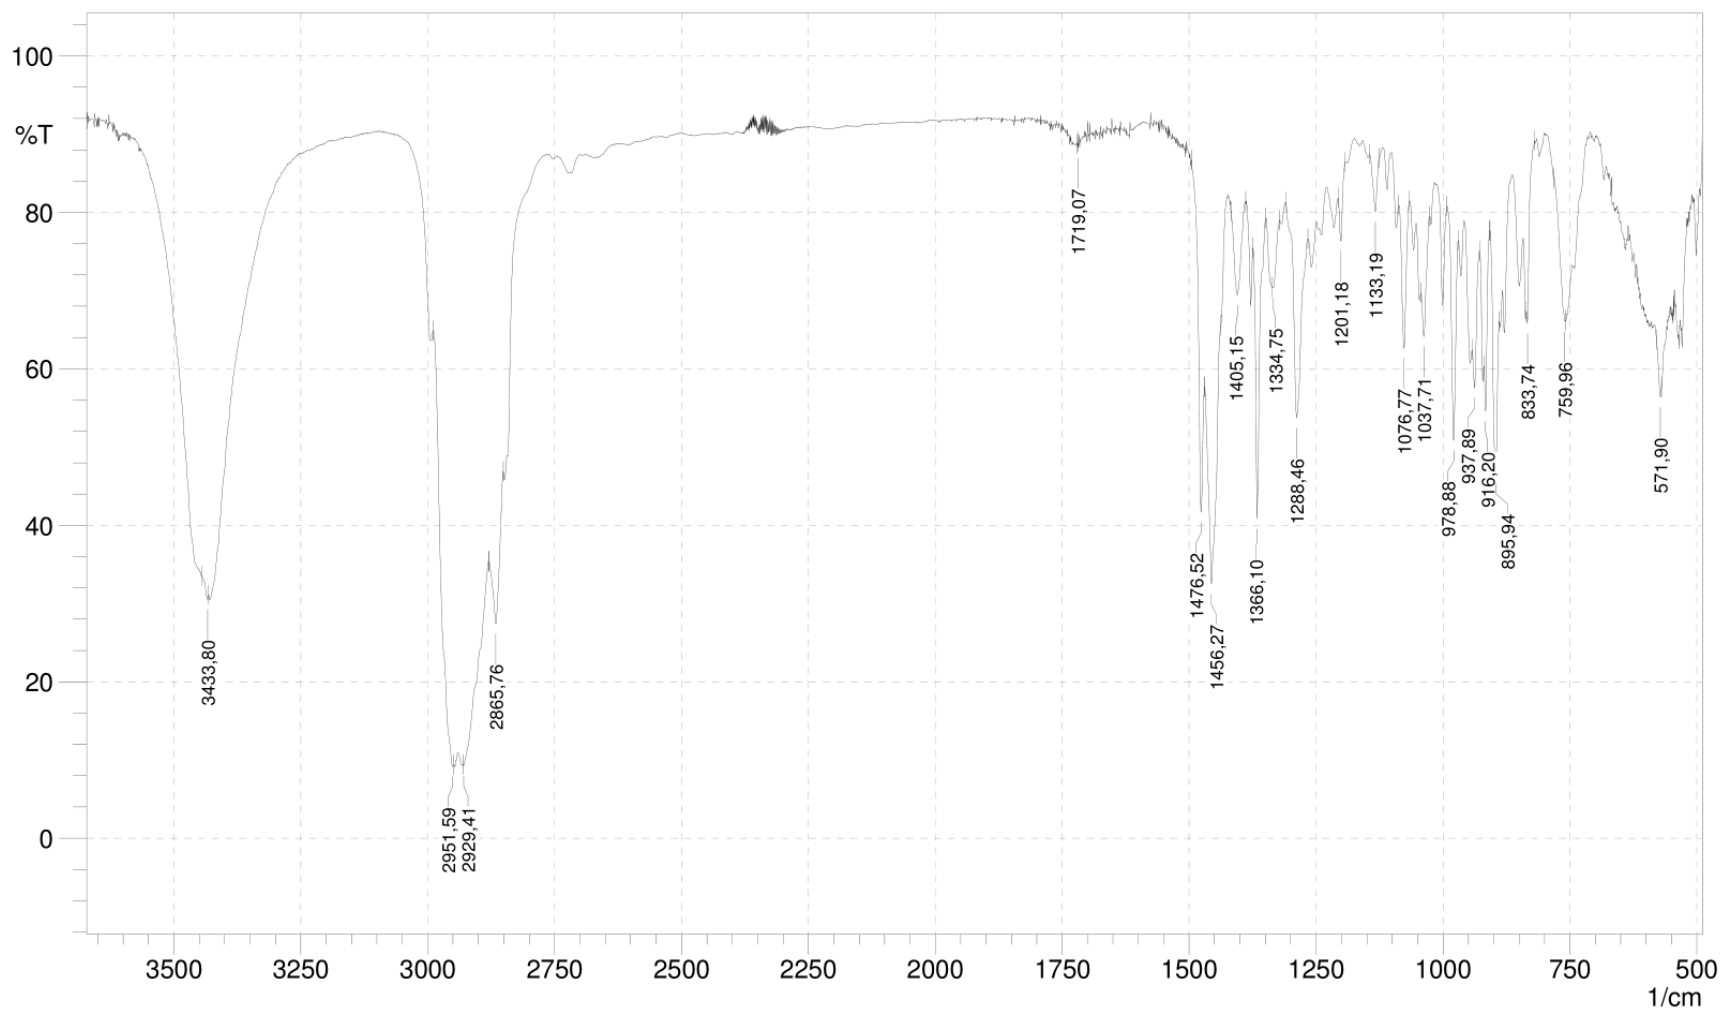

## Mass spectra of synthetic and isolated from nature propellane-containing alcohol 9

### Mass spectrum (GC-MS) of synthesized alcohol 9

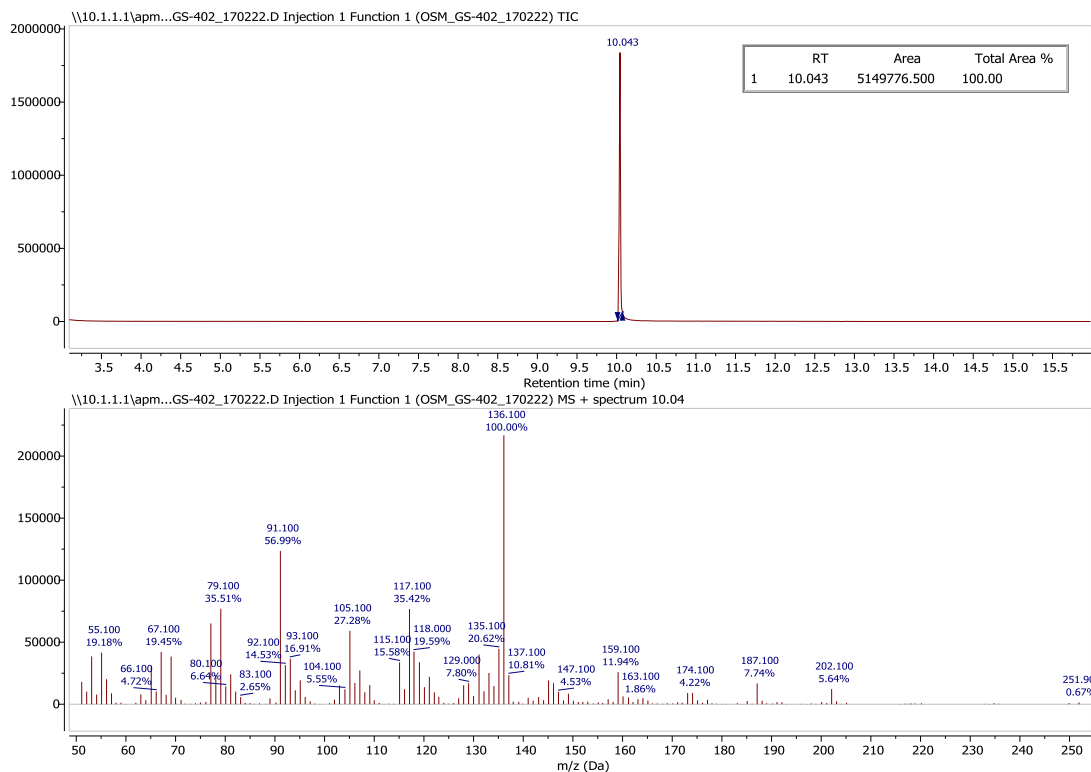

### Mass spectrum (GC-MS) of isolated 4,4-dimethyltetracyclo[6.3.0<sup>2.5</sup>.0<sup>1.8</sup>]tridecan-9-ol from *Achillea wilhelmsii*

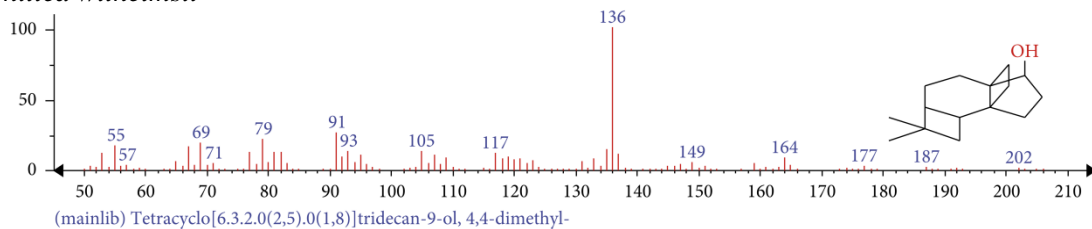

*J. Chem.* **2019**, *2019*, 5734257

## X-Ray crystallographic supplementary data for compound 13

### Computing details

Data collection: *CrysAlis PRO* 1.171.40.35a (Rigaku OD, 2018); cell refinement: *CrysAlis PRO* 1.171.40.35a (Rigaku OD, 2018); data reduction: *CrysAlis PRO* 1.171.40.35a (Rigaku OD, 2018); program(s) used to solve structure: SHELXT 2014/4 (Sheldrick, 2014); program(s) used to refine structure: *SHELXL2017/1* (Sheldrick, 2017).

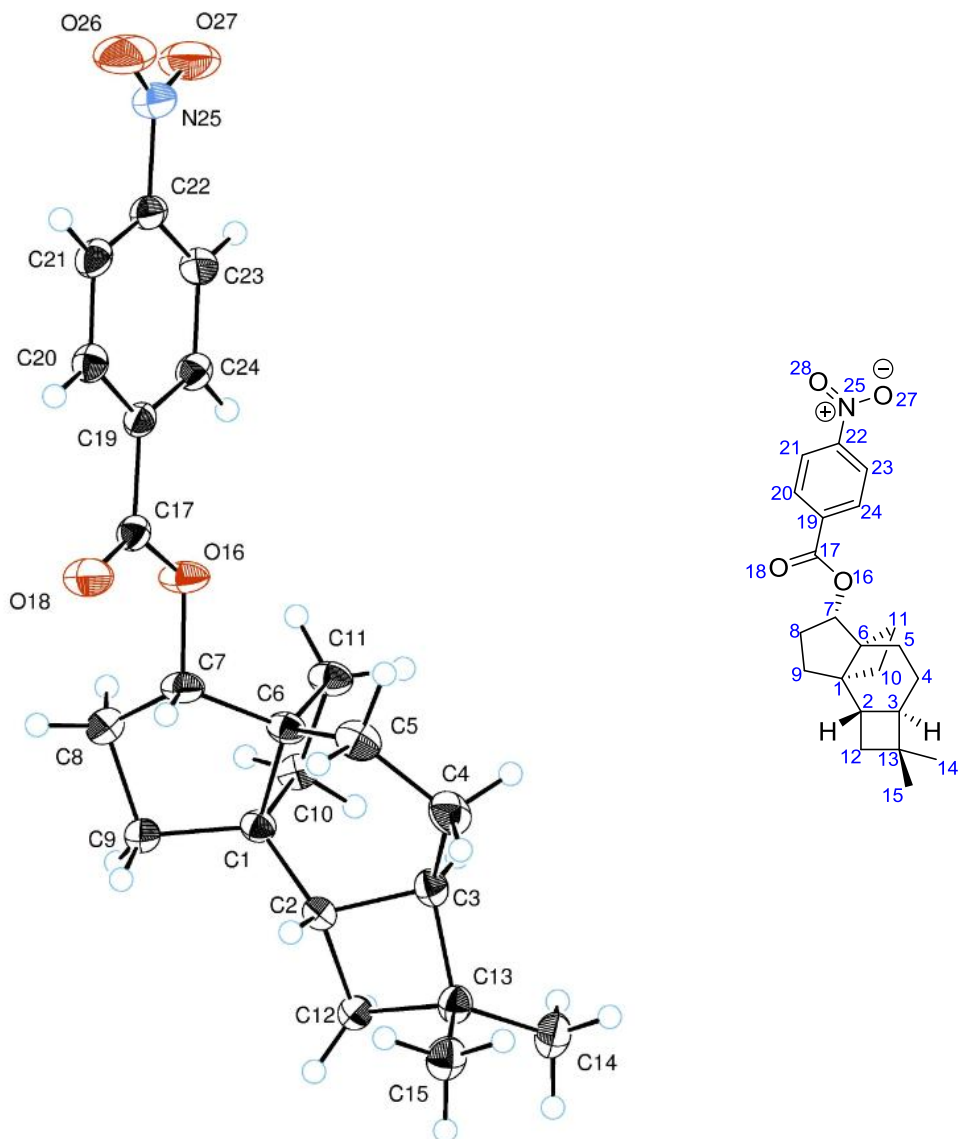

**Fig S1.** The asymmetric unit of the compound 13 drawn with displacement ellipsoids at the 50% probability level



### Crystal data and structure refinement

|                                                              |                                                                              |
|--------------------------------------------------------------|------------------------------------------------------------------------------|
| Empirical formula                                            | C <sub>22</sub> H <sub>27</sub> NO <sub>4</sub>                              |
| Formula weight                                               | 369.46                                                                       |
| Temperature/K                                                | 150.0(2)                                                                     |
| Crystal system                                               | orthorhombic                                                                 |
| Space group                                                  | <i>P</i> 2 <sub>1</sub> 2 <sub>1</sub> 2 <sub>1</sub>                        |
| <i>a</i> /Å                                                  | 6.06579(5)                                                                   |
| <i>b</i> /Å                                                  | 16.68048(13)                                                                 |
| <i>c</i> /Å                                                  | 18.97466(18)                                                                 |
| $\alpha$ /°                                                  | 90                                                                           |
| $\beta$ /°                                                   | 90                                                                           |
| $\gamma$ /°                                                  | 90                                                                           |
| Volume/Å <sup>3</sup>                                        | 1919.86(3)                                                                   |
| <i>Z</i>                                                     | 4                                                                            |
| $\rho_{\text{calc}}$ /cm <sup>3</sup>                        | 1.2781                                                                       |
| $\mu$ /mm <sup>-1</sup>                                      | 0.705                                                                        |
| <i>F</i> (000)                                               | 792                                                                          |
| Crystal size/mm <sup>3</sup>                                 | 0.19 × 0.11 × 0.08                                                           |
| Radiation                                                    | Cu K $\alpha$ ( $\lambda$ = 1.54184)                                         |
| 2 $\theta$ max. for data collection/°                        | 155.0                                                                        |
| Index ranges                                                 | -7 ≤ <i>h</i> ≤ 6, -21 ≤ <i>k</i> ≤ 19, -23 ≤ <i>l</i> ≤ 24                  |
| Reflections collected                                        | 12058                                                                        |
| Independent reflections                                      | 3897 [ <i>R</i> <sub>int</sub> = 0.0278, <i>R</i> <sub>sigma</sub> = 0.0288] |
| Data/restraints/parameters                                   | 3897/0/246                                                                   |
| Goodness-of-fit on <i>F</i> <sup>2</sup>                     | 1.058                                                                        |
| Final <i>R</i> indexes [ <i>I</i> > 2 $\sigma$ ( <i>I</i> )] | <i>R</i> <sub>1</sub> = 0.0313, <i>wR</i> <sub>2</sub> = 0.0806              |
| Final <i>R</i> indexes [all data]                            | <i>R</i> <sub>1</sub> = 0.0323, <i>wR</i> <sub>2</sub> = 0.0814              |
| Largest diff. peak/hole / e Å <sup>-3</sup>                  | 0.16/-0.17                                                                   |
| Flack's <i>x</i> parameter                                   | 0.02(3)                                                                      |

Crystallographic data have been deposited at the Cambridge Crystallographic Data Center with the deposition number 2346928.

## X-Ray crystallographic supplementary data for compound **10**

### Computing details

Data collection: *CrysAlis PRO* 1.171.40.35a (Rigaku OD, 2018); cell refinement: *CrysAlis PRO* 1.171.40.35a (Rigaku OD, 2018); data reduction: *CrysAlis PRO* 1.171.40.35a (Rigaku OD, 2018); program(s) used to solve structure: SHELXT 2014/4 (Sheldrick, 2014); program(s) used to refine structure: *SHELXL2017/1* (Sheldrick, 2017).

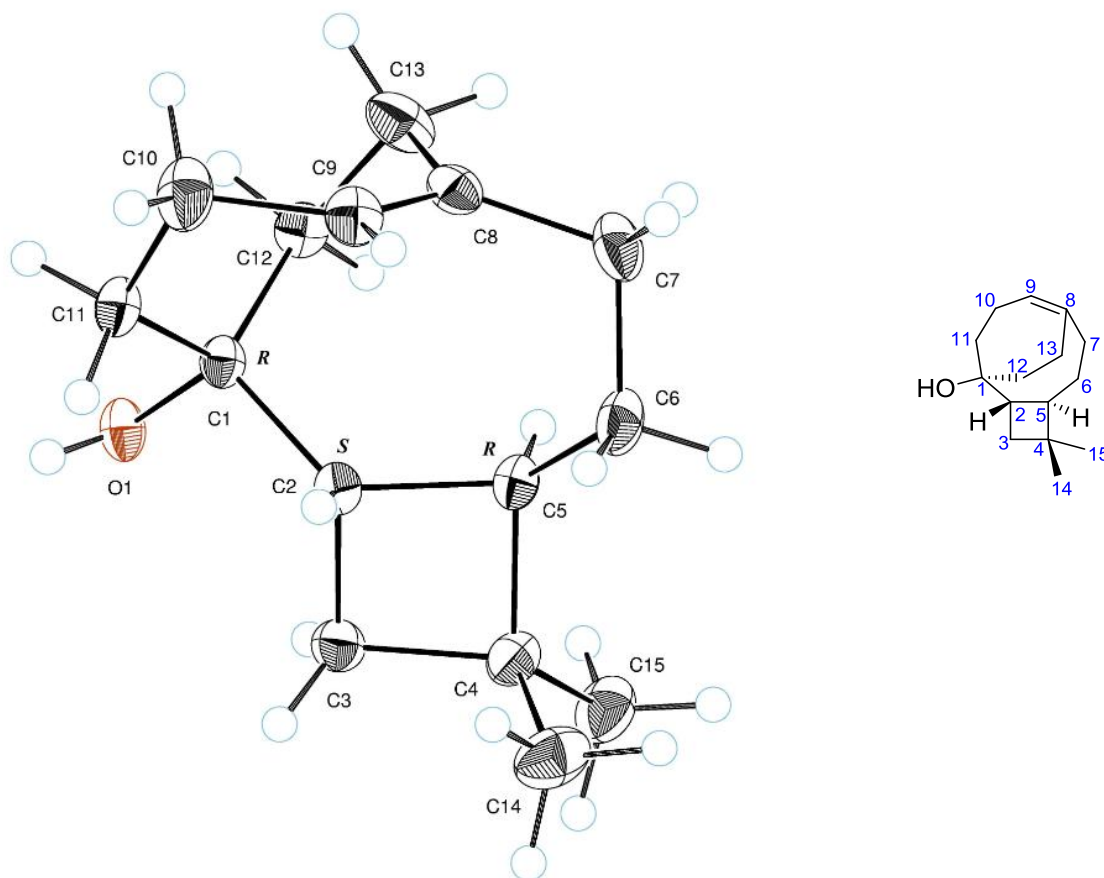

**Fig S2.** The asymmetric unit of the compound **10** drawn with displacement ellipsoids at the 50% probability level

### Crystal data and structure refinement

|                                                              |                                                                              |
|--------------------------------------------------------------|------------------------------------------------------------------------------|
| Empirical formula                                            | C <sub>15</sub> H <sub>24</sub> O                                            |
| Formula weight                                               | 220.36                                                                       |
| Temperature/K                                                | 150.0(1)                                                                     |
| Crystal system                                               | trigonal                                                                     |
| Space group                                                  | <i>P</i> 3 <sub>1</sub>                                                      |
| <i>a</i> /Å                                                  | 13.3360(4)                                                                   |
| <i>b</i> /Å                                                  | 13.3360(4)                                                                   |
| <i>c</i> /Å                                                  | 6.2105(2)                                                                    |
| $\alpha$ /°                                                  | 90                                                                           |
| $\beta$ /°                                                   | 90                                                                           |
| $\gamma$ /°                                                  | 120                                                                          |
| Volume/Å <sup>3</sup>                                        | 956.56(5)                                                                    |
| <i>Z</i>                                                     | 3                                                                            |
| $\rho_{\text{calc}}$ /cm <sup>3</sup>                        | 1.1475                                                                       |
| $\mu$ /mm <sup>-1</sup>                                      | 0.523                                                                        |
| <i>F</i> (000)                                               | 366                                                                          |
| Crystal size/mm <sup>3</sup>                                 | 0.17 × 0.02 × 0.01                                                           |
| Radiation                                                    | CuK $\alpha$ ( $\lambda$ = 1.54184 Å)                                        |
| 2 $\theta$ max. for data collection/°                        | 155.0                                                                        |
| Index ranges                                                 | -16 ≤ <i>h</i> ≤ 16, -16 ≤ <i>k</i> ≤ 14, -7 ≤ <i>l</i> ≤ 7                  |
| Reflections collected                                        | 5016                                                                         |
| Independent reflections                                      | 2221 [ <i>R</i> <sub>int</sub> = 0.0256, <i>R</i> <sub>sigma</sub> = 0.0311] |
| Data/restraints/parameters                                   | 2221/1/151                                                                   |
| Goodness-of-fit on <i>F</i> <sup>2</sup>                     | 1.062                                                                        |
| Final <i>R</i> indexes [ <i>I</i> > 2 $\sigma$ ( <i>I</i> )] | <i>R</i> <sub>1</sub> = 0.0302, <i>wR</i> <sub>2</sub> = 0.0761              |
| Final <i>R</i> indexes [all data]                            | <i>R</i> <sub>1</sub> = 0.0311, <i>wR</i> <sub>2</sub> = 0.0765              |
| Largest diff. peak/hole / e Å <sup>-3</sup>                  | 0.13/-0.12                                                                   |
| Flack's <i>x</i> parameter                                   | 0.1(2)                                                                       |

Crystallographic data have been deposited at the Cambridge Crystallographic Data Center with the deposition number 2346929.

## X-Ray crystallographic supplementary data for compound 7

### Computing details

Data collection: *CrysAlis PRO* 1.171.40.35a (Rigaku OD, 2018); cell refinement: *CrysAlis PRO* 1.171.40.35a (Rigaku OD, 2018); data reduction: *CrysAlis PRO* 1.171.40.35a (Rigaku OD, 2018); program(s) used to solve structure: SHELXT 2014/4 (Sheldrick, 2014); program(s) used to refine structure: *SHELXL2017/1* (Sheldrick, 2017).

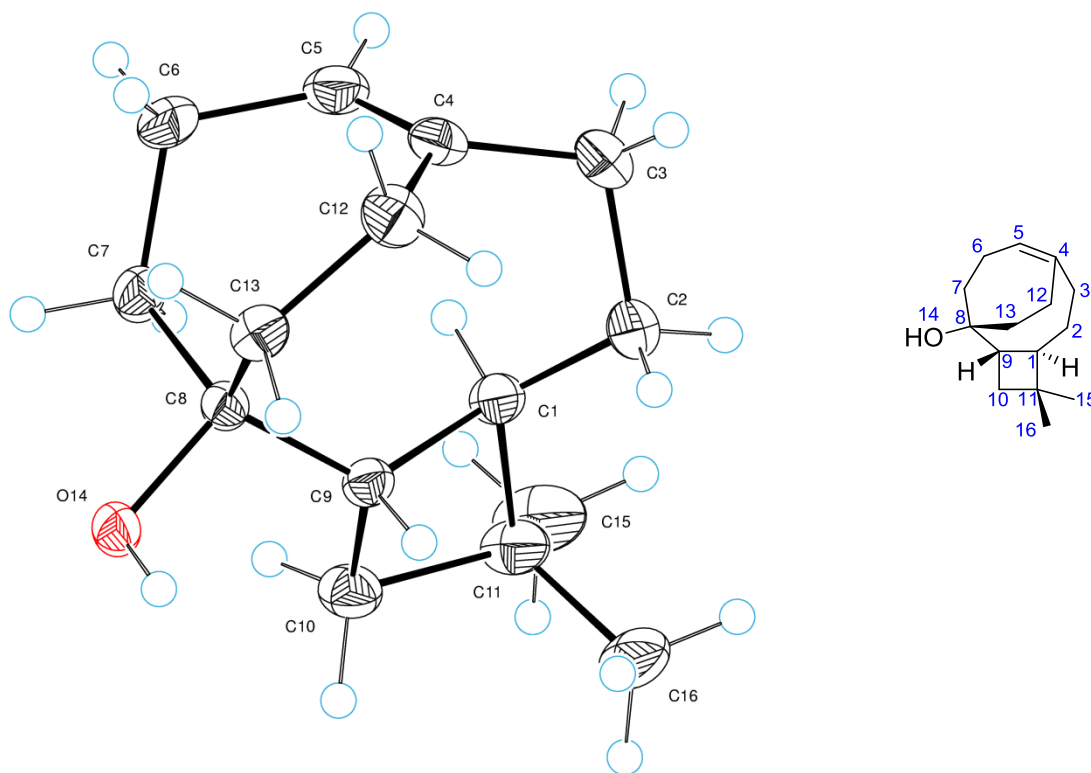

**Fig S3.** The asymmetric unit of the compound 7 drawn with displacement ellipsoids at the 50% probability level

### Crystal data and structure refinement

|                                                              |                                                                              |
|--------------------------------------------------------------|------------------------------------------------------------------------------|
| Empirical formula                                            | C <sub>15</sub> H <sub>24</sub> O                                            |
| Formula weight                                               | 220.34                                                                       |
| Temperature/K                                                | 160.0(1)                                                                     |
| Crystal system                                               | trigonal                                                                     |
| Space group                                                  | <i>P</i> 3 <sub>2</sub>                                                      |
| <i>a</i> /Å                                                  | 13.0367(2)                                                                   |
| <i>b</i> /Å                                                  | 13.0367(2)                                                                   |
| <i>c</i> /Å                                                  | 6.6998(1)                                                                    |
| $\alpha$ /°                                                  | 90                                                                           |
| $\beta$ /°                                                   | 90                                                                           |
| $\gamma$ /°                                                  | 120                                                                          |
| Volume/Å <sup>3</sup>                                        | 986.12(3)                                                                    |
| <i>Z</i>                                                     | 3                                                                            |
| $\rho_{\text{calc}}$ /cm <sup>3</sup>                        | 1.113                                                                        |
| $\mu$ /mm <sup>-1</sup>                                      | 0.508                                                                        |
| <i>F</i> (000)                                               | 366.0                                                                        |
| Crystal size/mm <sup>3</sup>                                 | 0.24 × 0.03 × 0.02                                                           |
| Radiation                                                    | CuK $\alpha$ ( $\lambda$ = 1.54184 Å)                                        |
| 2 $\theta$ max. for data collection/°                        | 160.0                                                                        |
| Index ranges                                                 | -16 ≤ <i>h</i> ≤ 16, -16 ≤ <i>k</i> ≤ 16, -8 ≤ <i>l</i> ≤ 5                  |
| Reflections collected                                        | 9553                                                                         |
| Independent reflections                                      | 2086 [ <i>R</i> <sub>int</sub> = 0.0306, <i>R</i> <sub>sigma</sub> = 0.0240] |
| Data/restraints/parameters                                   | 2086/1/152                                                                   |
| Goodness-of-fit on <i>F</i> <sup>2</sup>                     | 1.056                                                                        |
| Final <i>R</i> indexes [ <i>I</i> > 2 $\sigma$ ( <i>I</i> )] | <i>R</i> <sub>1</sub> = 0.0306, <i>wR</i> <sub>2</sub> = 0.0820              |
| Final <i>R</i> indexes [all data]                            | <i>R</i> <sub>1</sub> = 0.0312, <i>wR</i> <sub>2</sub> = 0.0824              |
| Largest diff. peak/hole / e Å <sup>-3</sup>                  | 0.18/-0.15                                                                   |
| Flack's <i>x</i> parameter                                   | 0.1(2)                                                                       |

Crystallographic data have been deposited at the Cambridge Crystallographic Data Center with the deposition number 2346931.

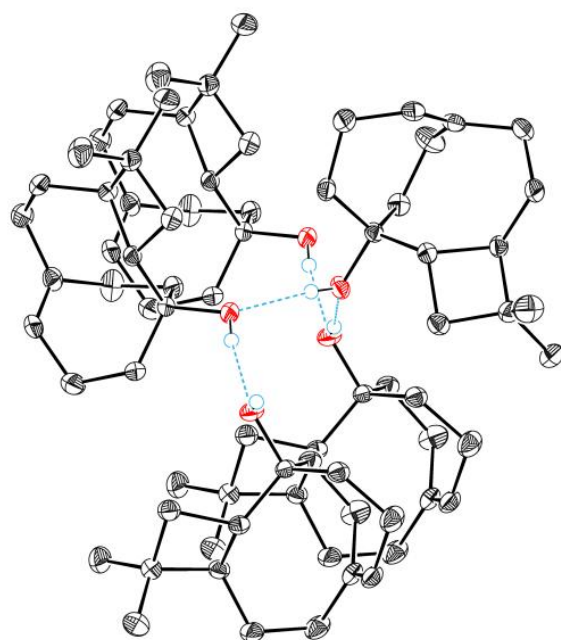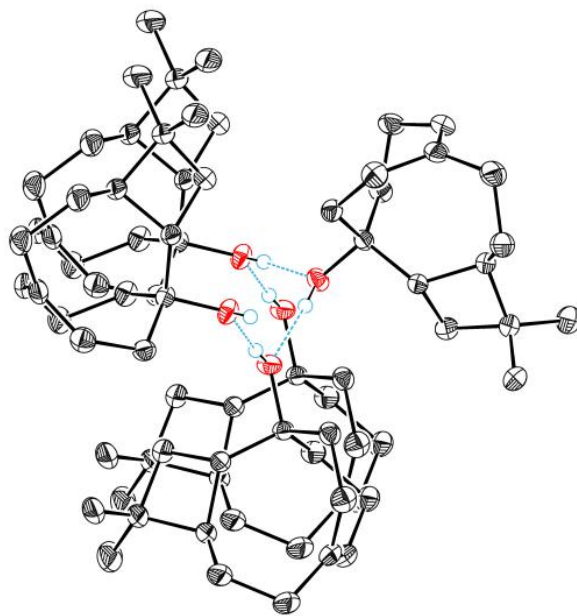

**Fig. S4.** Formation of the molecular chains in the crystal structures of **10** (top) and **7** (bottom). For the sake of clarity, hydrogen atoms not involved in the H-bonds shown have been omitted.

## X-Ray crystallographic supplementary data for compound 2

### Computing details

Data collection: *CrysAlis PRO* 1.171.40.35a (Rigaku OD, 2018); cell refinement: *CrysAlis PRO* 1.171.40.35a (Rigaku OD, 2018); data reduction: *CrysAlis PRO* 1.171.40.35a (Rigaku OD, 2018); program(s) used to solve structure: SHELXT 2014/4 (Sheldrick, 2014); program(s) used to refine structure: *SHELXL2017/1* (Sheldrick, 2017).

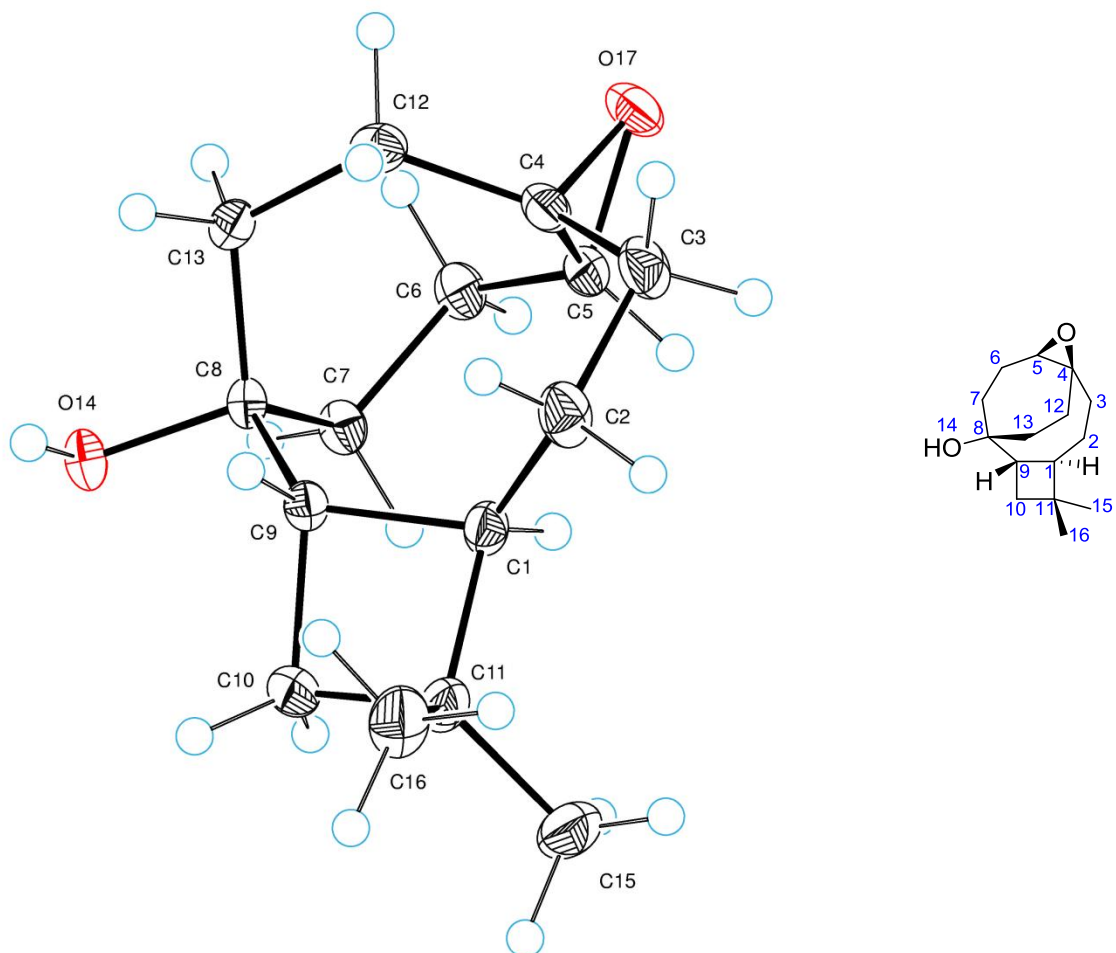

**Fig S5.** The asymmetric unit of the compound 2 drawn with displacement ellipsoids at the 50% probability level

### Crystal data and structure refinement

|                                                              |                                                                              |
|--------------------------------------------------------------|------------------------------------------------------------------------------|
| Empirical formula                                            | C <sub>15</sub> H <sub>24</sub> O <sub>2</sub>                               |
| Formula weight                                               | 236.36                                                                       |
| Temperature/K                                                | 150.0(1)                                                                     |
| Crystal system                                               | trigonal                                                                     |
| Space group                                                  | <i>P</i> 3 <sub>2</sub>                                                      |
| <i>a</i> /Å                                                  | 13.03323(11)                                                                 |
| <i>b</i> /Å                                                  | 13.03323(11)                                                                 |
| <i>c</i> /Å                                                  | 6.70964(7)                                                                   |
| $\alpha$ /°                                                  | 90                                                                           |
| $\beta$ /°                                                   | 90                                                                           |
| $\gamma$ /°                                                  | 120                                                                          |
| Volume/Å <sup>3</sup>                                        | 987.039(15)                                                                  |
| <i>Z</i>                                                     | 3                                                                            |
| $\rho_{\text{calc}}$ /cm <sup>3</sup>                        | 1.1928                                                                       |
| $\mu$ /mm <sup>-1</sup>                                      | 0.599                                                                        |
| <i>F</i> (000)                                               | 391.1                                                                        |
| Crystal size/mm <sup>3</sup>                                 | 0.22 × 0.07 × 0.06                                                           |
| Radiation                                                    | Cu K $\alpha$ ( $\lambda$ = 1.54184 Å)                                       |
| 2 $\theta$ max. for data collection/°                        | 160.0                                                                        |
| Index ranges                                                 | -16 ≤ <i>h</i> ≤ 16, -16 ≤ <i>k</i> ≤ 16, -8 ≤ <i>l</i> ≤ 8                  |
| Reflections collected                                        | 9171                                                                         |
| Independent reflections                                      | 2601 [ <i>R</i> <sub>int</sub> = 0.0177, <i>R</i> <sub>sigma</sub> = 0.0156] |
| Data/restraints/parameters                                   | 2601/1/160                                                                   |
| Goodness-of-fit on <i>F</i> <sup>2</sup>                     | 1.084                                                                        |
| Final <i>R</i> indexes [ <i>I</i> > 2 $\sigma$ ( <i>I</i> )] | <i>R</i> <sub>1</sub> = 0.0297, <i>wR</i> <sub>2</sub> = 0.0770              |
| Final <i>R</i> indexes [all data]                            | <i>R</i> <sub>1</sub> = 0.0298, <i>wR</i> <sub>2</sub> = 0.0770              |
| Largest diff. peak/hole / e Å <sup>-3</sup>                  | 0.16/-0.17                                                                   |
| Flack's <i>x</i> parameter                                   | 0.1(2)                                                                       |

Crystallographic data have been deposited at the Cambridge Crystallographic Data Center with the deposition number 2346932.



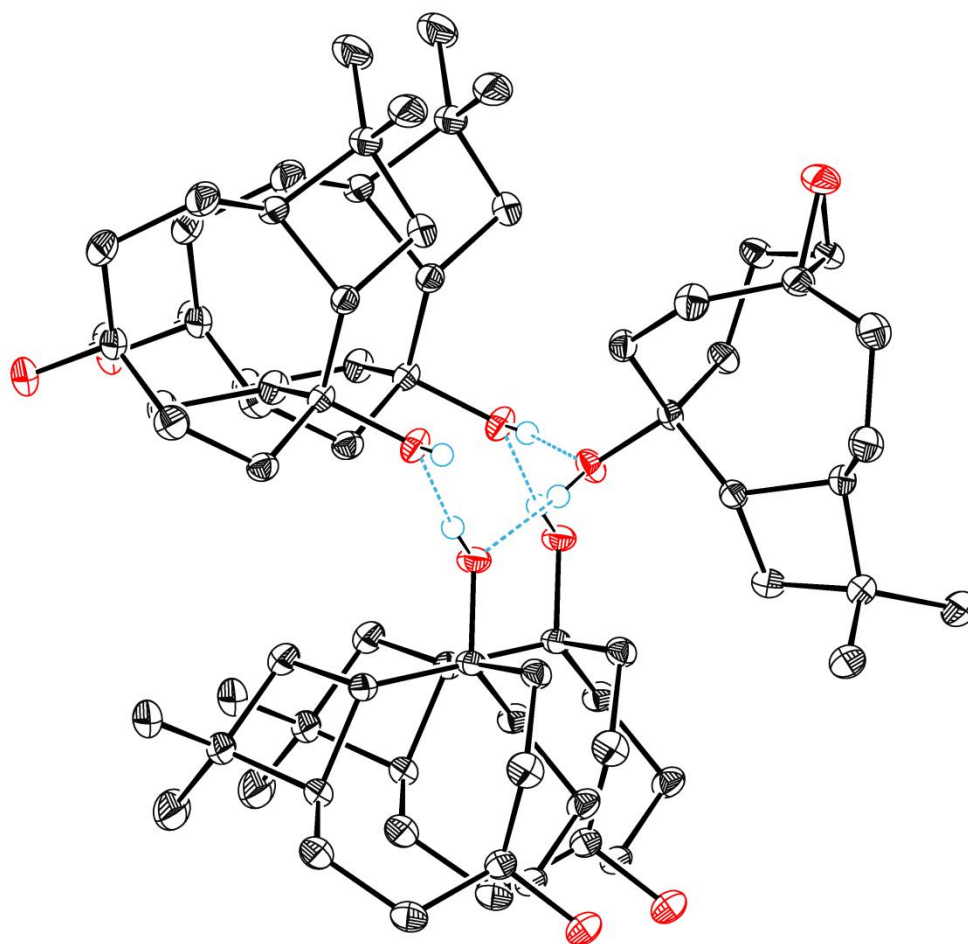

**Fig. S6.** Formation of the molecular chains in the crystal structure of **2**. For the sake of clarity, hydrogen atoms not involved in the H-bonds shown have been omitted.

## X-Ray crystallographic supplementary data for compound **11**

### Computing details

Data collection: *CrysAlis PRO* 1.171.40.35a (Rigaku OD, 2018); cell refinement: *CrysAlis PRO* 1.171.40.35a (Rigaku OD, 2018); data reduction: *CrysAlis PRO* 1.171.40.35a (Rigaku OD, 2018); program(s) used to solve structure: SHELXT 2014/4 (Sheldrick, 2014); program(s) used to refine structure: *SHELXL2017/1* (Sheldrick, 2017).

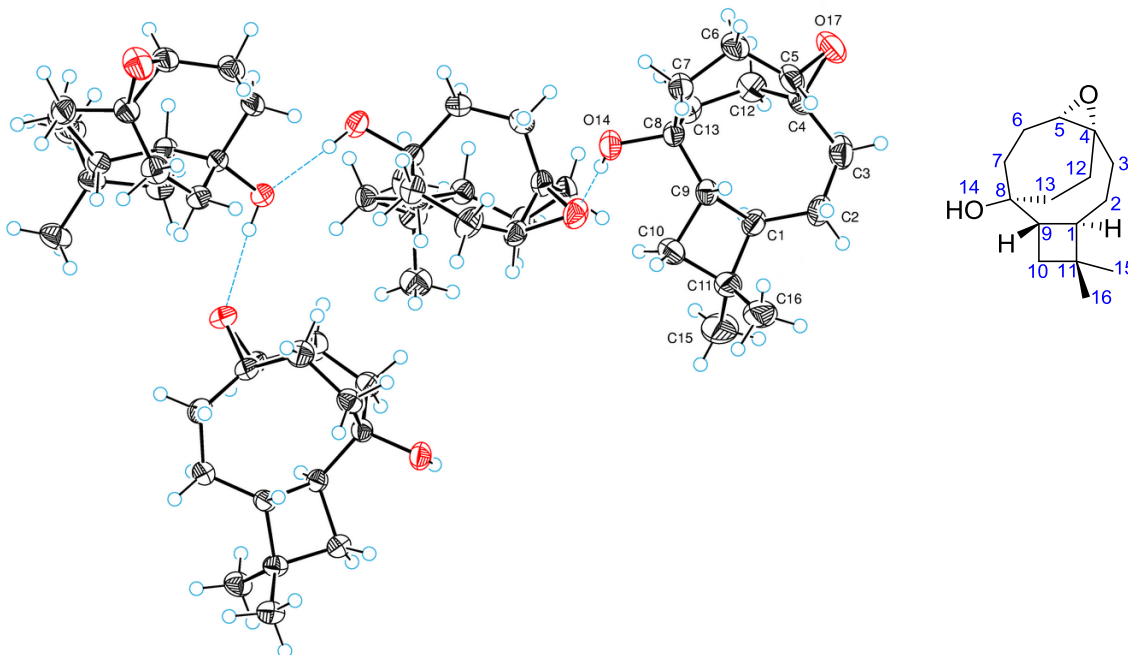

**Fig S7.** The asymmetric unit of the compound **11** drawn with displacement ellipsoids at the 50% probability level. The unit consists of 4 independent molecules forming hydrogen bonds. All 4 molecules represent the same stereoisomer.

### Crystal data and structure refinement

|                                                              |                                                                               |
|--------------------------------------------------------------|-------------------------------------------------------------------------------|
| Empirical formula                                            | C <sub>60</sub> H <sub>96</sub> O <sub>8</sub>                                |
| Formula weight                                               | 945.43                                                                        |
| Temperature/K                                                | 170.0(1)                                                                      |
| Crystal system                                               | monoclinic                                                                    |
| Space group                                                  | <i>P</i> 2 <sub>1</sub>                                                       |
| <i>a</i> /Å                                                  | 9.3483(1)                                                                     |
| <i>b</i> /Å                                                  | 17.5247(3)                                                                    |
| <i>c</i> /Å                                                  | 16.1772(2)                                                                    |
| $\alpha$ /°                                                  | 90                                                                            |
| $\beta$ /°                                                   | 90.546(1)                                                                     |
| $\gamma$ /°                                                  | 90                                                                            |
| Volume/Å <sup>3</sup>                                        | 2650.13(6)                                                                    |
| <i>Z</i>                                                     | 2                                                                             |
| $\rho_{\text{calc}}$ /cm <sup>3</sup>                        | 1.1847                                                                        |
| $\mu$ /mm <sup>-1</sup>                                      | 0.595                                                                         |
| <i>F</i> (000)                                               | 1040                                                                          |
| Crystal size/mm <sup>3</sup>                                 | 0.19 × 0.02 × 0.01                                                            |
| Radiation                                                    | Cu K $\alpha$ ( $\lambda$ = 1.54184 Å)                                        |
| 2 $\theta$ max. for data collection/°                        | 160.0                                                                         |
| Index ranges                                                 | -9 ≤ <i>h</i> ≤ 11, -22 ≤ <i>k</i> ≤ 21, -20 ≤ <i>l</i> ≤ 20                  |
| Reflections collected                                        | 47326                                                                         |
| Independent reflections                                      | 11054 [ <i>R</i> <sub>int</sub> = 0.0522, <i>R</i> <sub>sigma</sub> = 0.0330] |
| Data/restraints/parameters                                   | 11054/1/637                                                                   |
| Goodness-of-fit on <i>F</i> <sup>2</sup>                     | 1.034                                                                         |
| Final <i>R</i> indexes [ <i>I</i> > 2 $\sigma$ ( <i>I</i> )] | <i>R</i> <sub>1</sub> = 0.0536, <i>wR</i> <sub>2</sub> = 0.1468               |
| Final <i>R</i> indexes [all data]                            | <i>R</i> <sub>1</sub> = 0.0543, <i>wR</i> <sub>2</sub> = 0.1474               |
| Largest diff. peak/hole / e Å <sup>-3</sup>                  | 0.29/-0.26                                                                    |
| Flack's <i>x</i> parameter                                   | 0.02(7)                                                                       |

Crystallographic data have been deposited at the Cambridge Crystallographic Data Center with the deposition number 2346930.

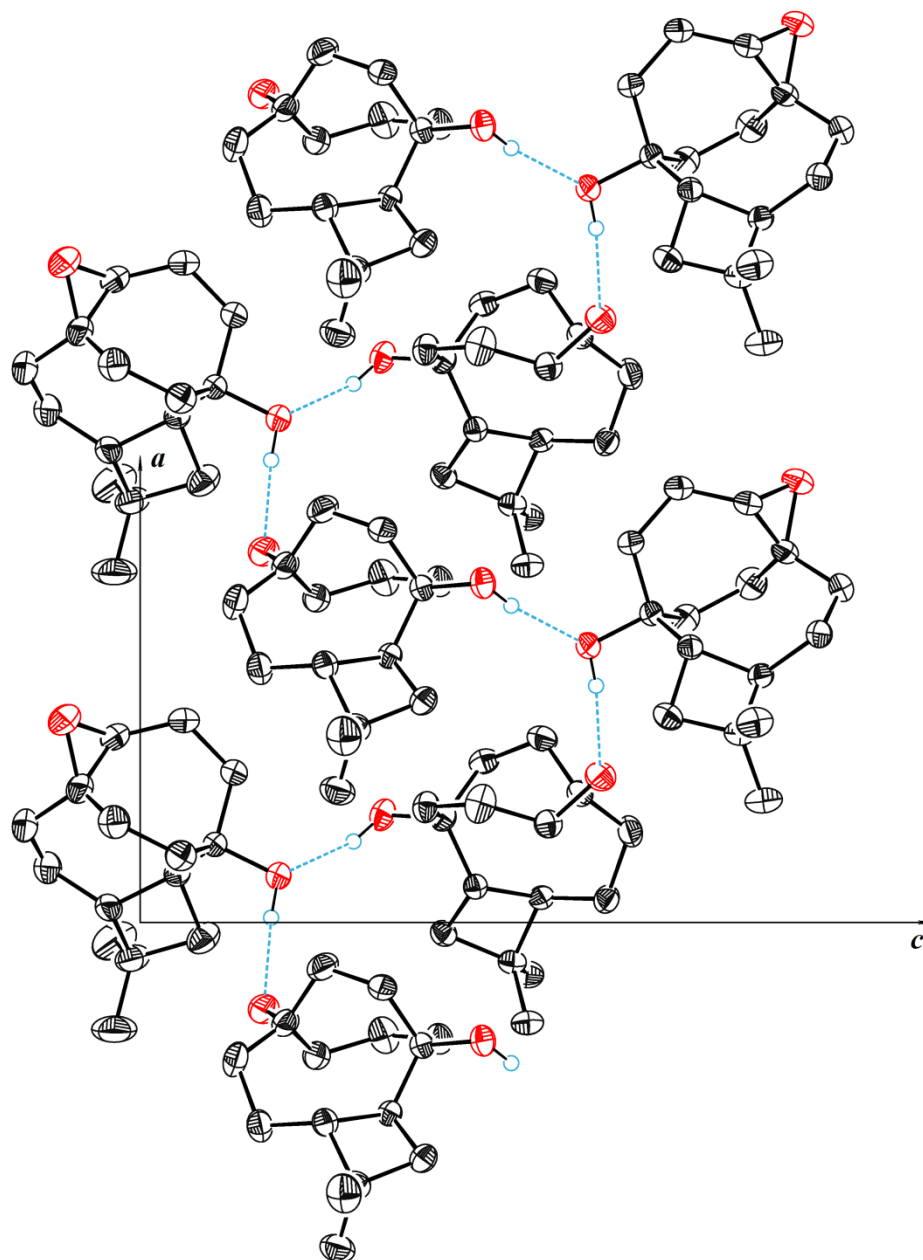

**Fig S8.** A projection of the crystal structure of **11** along monoclinic axis. For the sake of clarity, hydrogen atoms not involved in the H-bonds shown have been omitted.

## Procedure for the DFT calculations

All calculations were performed using the Gaussian 09 software package.<sup>1</sup> All geometry optimizations were performed without any restrictions using the B3LYP method and 6-31+G(d) basis set for all atoms. The transition state (TS) geometries were located by performing a coordinate scan for corresponding bond formation or dissociation. The obtained transition state like structure was then optimized to the TS using the Berny algorithm without any restrictions. The stationary point was verified to be real minima (zero imaginary frequency) or TS (one imaginary frequency) by performing frequency calculations at the same level of theory. Intrinsic reaction coordinates (IRC) were calculated for all TS to confirm that the first-order saddle points connect the correct stationary points of a starting material and a product on the potential energy surface. Single-point energy (SPE) calculations were performed on the stationary points using the 6-311++G(3df,2p) basis set for all atoms. SPE calculations were carried out in THF ( $\epsilon = 7.4257$ ) or MeCN ( $\epsilon = 35.688$ ) using implicit solvent modeling with the IEFPCM method. All calculations were performed using superfine integral grid (integral=grid=superfine).<sup>2</sup>

## References

- (1) Frisch, M. J.; Trucks, G. W.; Schlegel, H. B.; Scuseria, G. E.; Robb, M. A.; Cheeseman, J. R.; Scalmani, G.; Barone, V.; Mennucci, B.; Petersson, G. A.; Nakatsuji, H.; Caricato, M.; Li, X.; Hratchian, H. P.; Izmaylov, A. F.; Bloino, J.; Zheng, G.; Sonnenberg, J. L.; Hada, M.; Ehara, M.; Toyota, K.; Fukuda, R.; Hasegawa, J.; Ishida, M.; Nakajima, T.; Honda, Y.; Kitao, O.; Nakai, H.; Vreven, T.; Jr., J. A. M.; Peralta, J. E.; Ogliaro, F.; Bearpark, M.; Heyd, J. J.; Brothers, E.; Kudin, K. N.; Staroverov, V. N.; Keith, T.; Kobayashi, R.; Normand, J.; Raghavachari, K.; Rendell, A.; Burant, J. C.; Iyengar, S. S.; Tomasi, J.; Cossi, M.; Rega, N.; Millam, J. M.; Klene, M.; Knox, J. E.; Cross, J. B.; Bakken, V.; Adamo, C.; Jaramillo, J.; Gomperts, R.; Stratmann, R. E.; Yazyev, O.; Austin, A. J.; Cammi, R.; Pomelli, C.; Ochterski, J. W.; Martin, R. L.; Morokuma, K.; Zakrzewski, V. G.; Voth, G. A.; Salvador, P.; Dannenberg, J. J.; Dapprich, S.; Daniels, A. D.; Farkas, O.; Foresman, J. B.; Ortiz, J. V.; Cioslowski, J.; Fox, D. J. *Gaussian 09, Revision D.01*, 2013.
- (2) Bootsma, A. N.; Wheeler, S. *Popular Integration Grids Can Result in Large Errors in DFT-Computed Free Energies*; preprint; 2019. <https://doi.org/10.26434/chemrxiv.8864204.v4>.

# Optimized geometries

SM-A

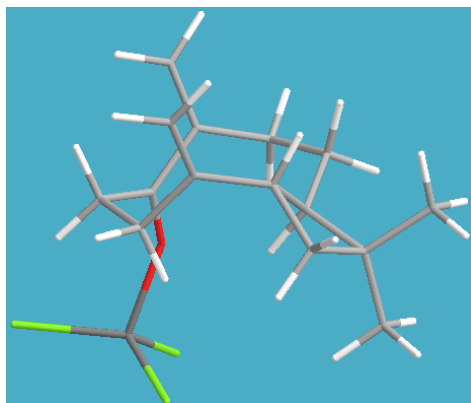

```

Zero-point correction=                0.344755
(Hartree/Particle)
Thermal correction to Energy=         0.367491
Thermal correction to Enthalpy=       0.368435
Thermal correction to Gibbs Free Energy= 0.291362
Sum of electronic and zero-point Energies= -2282.972827
Sum of electronic and thermal Energies= -2282.950091
Sum of electronic and thermal Enthalpies= -2282.949147
Sum of electronic and thermal Free Energies= -2283.026220
    
```

E(RB3LYP) = -2283.65418504 (MeCN)

```

0 1
C      -2.77198900   0.45563200  -0.56302100
C      -3.13932000  -0.75122900  -1.47960100
C      -2.97381000  -1.70481100  -0.25767600
C      -2.09865700  -0.57651100  0.40755300
H      -3.69086500  0.81744000  -0.08640600
H      -2.37100100  -0.93606600  -2.23948800
H      -4.11856300  -0.71183900  -1.97089300
C      -1.06637900  -0.77038100  0.09069600
H      -4.31216300  -1.95633800  0.45184400
H      -4.95211400  -2.59226200  -0.17300800
H      -4.16904300  -2.47477100  1.40820800
H      -4.86491600  -1.03091600  0.65286700
C      -2.25362100  -3.02846100  -0.51629100
H      -2.03479000  -3.55084000  0.42505500
H      -2.87276900  -3.69823700  -1.12797100
H      -1.30370600  -2.87409900  -1.04099600
C      -2.14329600  -0.34842100  1.92545000
H      -2.26597500  -1.31226700  2.43743600
H      -3.02968100  0.24907000  2.17816500
C      -0.88603100  0.33067400  2.53096000
H      -1.09696500  0.62133800  3.56597100
H      -0.06076700  -0.38690400  2.55928400
C      -2.07591300  1.64973600  -1.17301000
C      -2.74212500  2.80096400  -1.35811800
H      -2.28904500  3.65506800  -1.85898300
H      -3.77147500  2.92568500  -1.02925700
C      -0.45311500  1.54922800  1.74159200
C      -0.86219000  2.79880500  2.03380600
H      -0.56404500  3.67126900  1.46279200
H      -1.48949500  2.98505800  2.90211700
C      0.48126500  1.33318300  0.61758900
O      1.28081100  0.36714900  0.72080900
C      0.42312700  2.13922100  -0.63901600
H      1.40604100  2.12583200  -1.11747000
H      0.14040900  3.17354600  -0.43271800
C      -0.63486900  1.53326400  -1.63571800
H      -0.35819800  0.49633600  -1.84922600
H      -0.49932700  2.09281200  -2.56727100
Al      2.72839700  -0.48456400  -0.13191500
Cl      3.49902600  -1.74712300  1.39475100
Cl      1.78873500  -1.50960200  -1.76394700
Cl      4.02184300  1.11188200  -0.73424700
    
```

TS-A

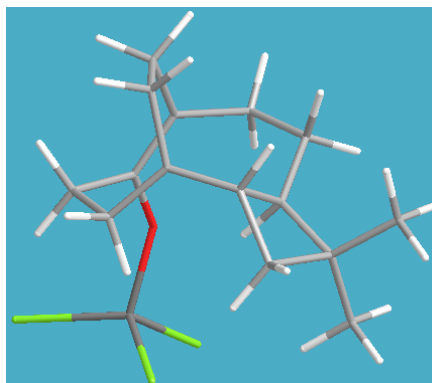

```

Zero-point correction=                0.345126
(Hartree/Particle)
Thermal correction to Energy=         0.366540
Thermal correction to Enthalpy=       0.367484
Thermal correction to Gibbs Free Energy= 0.294738
Sum of electronic and zero-point Energies= -2282.934141
Sum of electronic and thermal Energies= -2282.912728
Sum of electronic and thermal Enthalpies= -2282.911784
Sum of electronic and thermal Free Energies= -2282.984529
    
```

E(RB3LYP) = -2283.62753599 (MeCN)

```

0 1
C      -2.66391700   0.17699300  -0.89729000
C      -2.52068000  -1.17675500  -1.61774900
C      -2.50051400  -1.94078400  -0.25947600
C      -1.93147000  -0.65605500  0.42110100
H      -3.69149200  0.35598500  -0.57629800
H      -1.56816100  -1.27579900  -2.14459800
H      -3.34550200  -1.40384800  -2.30180800
H      -0.85802600  -0.62985500  0.23197300
C      -3.91042000  -2.32533900  0.21022900
H      -4.30607400  -3.12574200  -0.42649800
H      -3.89354500  -2.70050900  1.23997400
H      -4.62308400  -1.49277400  0.17158500
C      -1.55681700  -3.14286900  -0.17380500
H      -1.48175900  -3.51152700  0.85696900
H      -1.93871800  -3.96557800  -0.79231500
C      -0.54966700  -2.89384000  -0.52199200
H      -2.24455800  -0.18987100  1.83441200
H      -2.28305300  -1.08689200  2.47218700
H      -3.25239900  0.24416200  1.88044100
C      -1.17957400  0.80287300  2.39928500
H      -1.59535900  1.29748800  3.28706300
H      -0.30526400  0.23326300  2.72468800
C      -1.95547800  1.39750300  -1.09738700
C      -2.48722300  2.62649100  -0.45462300
H      -2.29588200  3.48537000  -1.10810900
H      -3.56488200  2.54805600  -0.29097100
C      -0.75390000  1.79519800  1.34269300
C      -1.73163800  2.87703100  0.94368100
H      -1.24585100  3.85578100  0.86831800
H      -2.50980400  2.97224000  1.70657000
O      0.32765500  1.54055600  0.55461100
C      1.17168700  0.54874800  0.82170500
C      0.42110800  2.20775900  -0.80702300
H      1.41261800  2.08879500  -1.24974700
H      0.21329100  3.28142300  -0.75146200
C      -0.62384700  1.50272900  -1.75053700
H      -0.24283500  0.52863400  -2.06377400
H      -0.75822600  2.11863100  -2.65608800
Al      2.53815300  -0.32274800  0.08051600
Cl      3.22931100  -1.73434400  1.53635100
Cl      1.68873200  -1.35577500  -1.66502800
Cl      4.03383000  1.08479700  -0.58103900
    
```

## INT-A

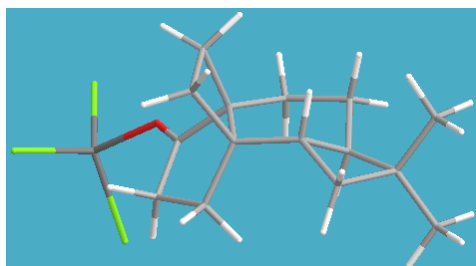

```

Zero-point correction=                0.346799
(Hartree/Particle)
Thermal correction to Energy=         0.368228
Thermal correction to Enthalpy=       0.369173
Thermal correction to Gibbs Free Energy= 0.295018
Sum of electronic and zero-point Energies= -2282.980266
Sum of electronic and thermal Energies= -2282.958837
Sum of electronic and thermal Enthalpies= -2282.957892
Sum of electronic and thermal Free Energies= -2283.032047

```

E(RB3LYP) = -2283.65836511 (MeCN)

```

O 1
C      -3.02388400   0.74248300   0.03873000
C      -4.22906500   0.77338900  -0.93932500
C      -4.65122500  -0.63345000  -0.36035300
C      -3.15050000  -0.78479200   0.08184200
H      -3.38718500   1.12426400   1.00281600
H      -3.92634600   0.69098200  -1.99001300
H      -4.94466800   1.59760000  -0.83969600
H      -2.61731100  -1.21301600  -0.78278900
C      -5.64353000  -0.51598700   0.80380100
H      -6.63129400  -0.21251600   0.43409700
H      -5.76258500  -1.47972300   1.31513400
C      -5.33356600   0.22128800  -1.55326800
H      -5.15106500  -1.65796600  -1.37928700
H      -5.26634700  -2.64904100  -0.92039800
H      -6.12844200  -1.36519300  -1.78510200
C      -4.45591200  -1.75734900  -2.22213300
C      -2.53701500  -1.36374100   1.34950100
H      -2.66760300  -2.44929000   1.44453300
H      -2.99366600  -0.90609400   2.23741900
C      -1.01278800  -1.06147500   1.29171400
H      -0.53862700  -1.22945300   2.26619700
C      -0.56165800  -1.79273900   0.60852900
C      -1.59337400   1.23721800  -0.12676400
C      -1.24343800   2.48859900   0.74525400
H      -0.48506800   3.13486300   0.28900200
H      -2.09063900   3.11593900   1.03958100
C      -0.64143400   0.37615200   0.81085100
C      -0.65191000   1.56031100   1.83892100
C      0.30840500    1.83543600   2.28635600
H      -1.36094500   1.34646600   2.64503700
C      0.65082200   0.35358000   0.04515900
O      1.69289100  -0.13431400   0.52535800
C      0.53047400   0.97496700  -1.32076800
H      1.01606600   0.34045600  -2.07180500
C      1.12001600   1.90471500  -1.30291300
C      -0.97927600  1.21122300  -1.53895000
H      -1.40114300   0.38684600  -2.12656700
H      -1.17819400   2.13694100  -2.08939400
Al      3.48555700  -0.34215800  -0.07124900
Cl      4.45083500  -1.26622800   1.57621700
Cl      3.26665200  -1.55705900  -1.82173600
Cl      4.07043000   1.67847100  -0.47858400

```

## SM-B

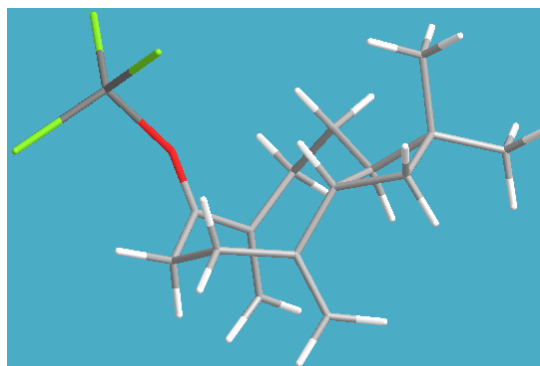

```

Zero-point correction=                0.344800
(Hartree/Particle)
Thermal correction to Energy=         0.367526
Thermal correction to Enthalpy=       0.368470
Thermal correction to Gibbs Free Energy= 0.290871
Sum of electronic and zero-point Energies= -2282.973050
Sum of electronic and thermal Energies= -2282.950324
Sum of electronic and thermal Enthalpies= -2282.949379
Sum of electronic and thermal Free Energies= -2283.026979

```

E(RB3LYP) = -2283.65444420 (MeCN)

```

O 1
C      -0.59573200   1.25235300   0.81449800
C      0.25150400   1.97872000  -1.45639500
C      0.39784300   1.27439400   1.90314300
C      1.70662500   1.67444100  -1.13531400
C      0.84491300   2.45315300   2.38006300
C      2.60363700   2.67142700  -1.09858000
C      0.84491300   2.45315300   2.38006300
H      1.53940900   2.48117200   3.21567300
H      0.51853700   3.41461300   2.00002700
H      3.65579400   2.50199000  -0.88485000
H      2.31659800   3.70345800  -1.29095700
C      0.85471200  -0.05360600   2.46880500
H      1.57399100   0.15891300   3.26824900
C      2.07968500   0.21958400  -0.91056800
H      1.26087300  -0.40778700  -1.28110200
C      2.52831700  -0.35158300   0.49241600
H      3.08838000   0.42934100   1.02686400
C      1.50480600  -1.00161500   1.43118300
H      0.72385100  -1.49548000   0.84277000
C      -0.66306500   2.32538000  -0.22301300
H      -0.33193300   3.28095000   0.18639100
H      -1.69429200   2.42270000  -0.57446900
C      -0.20298700   1.13690100  -1.98869100
H      3.56347800  -1.26836400  -0.25749800
C      3.41980500  -0.32263100  -1.48520100
H      3.36932500  -0.78726700  -2.47679300
H      4.20081700   0.44493400  -1.49949600
H      0.00353100  -0.56878600   2.93082600
H      1.99795700  -1.79942600   2.00290900
C      4.95108600  -1.34670400   0.38066300
H      4.92047800  -1.89497000   1.33241300
H      5.65865700  -1.86904200  -0.27703400
C      5.35696400  -0.34722100   0.58197000
H      3.03984300  -2.67845500  -0.56783700
H      3.72315000  -3.18386800  -1.26225500
H      2.97465300  -3.29563600   0.33682300
H      2.04843900  -2.66471100  -1.03458100
H      0.18587500   2.85174800  -2.11432300
O      -1.32551000   0.23042300   0.73800100
Al      -2.75499000  -0.56508900  -0.19256400
Cl      -4.09702500  1.03669400  -0.66395400
Cl      -1.77445800  -1.41708300  -1.89654900
Cl      -3.50462600  -1.97071100  1.21584200

```

### TS-B

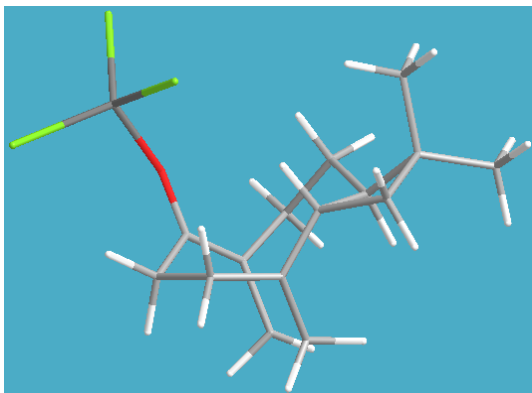

```

Zero-point correction=                0.345372
(Hartree/Particle)
Thermal correction to Energy=         0.366664
Thermal correction to Enthalpy=       0.367608
Thermal correction to Gibbs Free Energy=
0.294717
Sum of electronic and zero-point Energies=
-2282.933221
Sum of electronic and thermal Energies=
-2282.911930
Sum of electronic and thermal Enthalpies=
-2282.910986
Sum of electronic and thermal Free Energies=
-2282.983877
  
```

E(RB3LYP) = -2283.62621007 (MeCN)

```

O 1
C      -0.54009900   1.42926800   0.74838200
C      0.31420800   1.97060200  -1.63288100
C      0.58811500   1.55915100   1.50149800
C      1.55281300   1.54769900  -0.95238200
C      1.56231400   2.67507600   1.18426500
C      2.35038500   2.55106800  -0.24837000
H      2.34876000   2.72505700   1.94151900
H      1.07060100   3.65222700   1.15353700
H      3.37621000   2.22408400  -0.06909300
H      2.34429500   3.52541900  -0.74211100
C      1.02416300   0.45431500   2.44563100
H      1.79860900   0.83679700   3.12463900
C      1.81544400   0.12946300  -0.76451200
H      0.91563400  -0.44455600  -1.00228200
C      2.50498100  -0.42030000   0.53386400
H      3.25610100   0.30013200   0.88515600
C      1.57578000  -0.79097600   1.69236600
H      0.73733300  -1.38529200   1.31563400
C      -0.73394000  2.32890600  -0.46391400
H      -0.59381800  3.38268900  -0.20489100
H      -1.73139700  2.21293100  -0.89316800
H      -0.10476100  1.16350500  -2.23781900
C      3.25820900  -1.47724600  -0.34865900
C      3.02720500  -0.52960700  -1.56842100
H      2.73986500  -0.96838400  -2.52804100
H      3.85309100   0.17488800  -1.71086000
H      0.18418800   0.13235900   3.07023500
H      2.12462200  -1.42790500   2.40112100
C      4.71992000  -1.72682800   0.02078700
H      4.79440600  -2.26875200   0.97225800
H      5.22123200  -2.33412000  -0.74385300
H      5.27815800  -0.78765500   0.12424700
C      2.50459700  -2.80461800  -0.50933700
H      2.98714400  -3.42005700  -1.27876700
H      2.51698800  -3.37345900   0.42767000
H      1.45754200  -2.66879500  -0.80015100
H      0.46425000  2.87326600  -2.23423100
O      -1.39933400  0.43926000   0.94266400
Al      -2.61260800  -0.48988600   0.02320900
Cl      -4.14619900  0.84759300  -0.70662800
Cl      -1.51926400  -1.31702000  -1.69729300
Cl      -3.33601200  -2.03914800   1.30723400
  
```

### INT-B

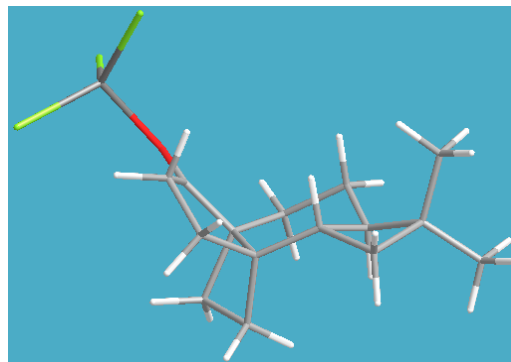

```

Zero-point correction=                0.347136
(Hartree/Particle)
Thermal correction to Energy=         0.368472
Thermal correction to Enthalpy=       0.369416
Thermal correction to Gibbs Free Energy=
0.295369
Sum of electronic and zero-point Energies=
-2282.979411
Sum of electronic and thermal Energies=
-2282.958076
Sum of electronic and thermal Enthalpies=
-2282.957132
Sum of electronic and thermal Free Energies=
-2283.031178
  
```

E(RB3LYP) = -2283.65835264 (MeCN)

```

O 1
C      -0.62849700   0.60764200   0.05033900
C      0.79462800   1.83661800  -1.48531700
C      0.63117800   0.87827400   0.79764900
C      1.67993300   1.39179300  -0.27930600
C      0.68016000   2.35348300   1.39303800
C      2.02782100   2.57850400   0.66024900
H      0.66852200   2.38830500   2.48578600
H      -0.12187900  2.99759700   1.01924900
H      2.88140400   2.36755000   1.31194400
H      2.18351000   3.55333900   0.18688900
C      1.04477800  -0.21821400   1.81958600
H      1.51069900   0.27954700   2.67864700
C      2.66982900   0.28899300  -0.60487500
H      2.12353400  -0.42389100  -1.24275800
C      3.17271000  -0.49276600   0.61372100
H      3.57397700   0.22195900   1.34962400
C      2.05622100  -1.27560900   1.29269400
H      1.57394200  -1.96252100   0.58380600
C      -0.52820600  1.04850200  -1.38193700
H      -1.42638100  1.59161600  -1.69734700
H      -0.51824200  0.12464700  -1.98181000
H      1.30229800   1.65057700  -2.43670100
C      4.40810200  -0.95125100  -0.24297300
C      4.13031600   0.32934300  -1.12652100
H      4.29077800   0.24390900  -2.20741500
H      4.68780100   1.19563700  -0.74976800
H      0.13621300  -0.69940800   2.19960800
H      2.39964100  -1.87913500   2.14268600
C      5.74991800  -0.98465300   0.48927500
H      5.79171500  -1.81984300   1.20117900
H      6.58100300  -1.11042000  -0.21721900
H      5.92465700  -0.05711200   1.04861800
C      4.19454000  -2.25860400  -1.01683600
H      5.00248500  -2.40847100  -1.74433200
H      4.19725100  -3.11947000  -0.33630200
H      3.24823500  -2.27718700  -1.56924700
H      0.58944900   2.91172200  -1.44099700
O      -1.62115800  0.05741500   0.57062500
Al      -3.34716800  -0.44955200  -0.03256900
Cl      -4.20765300  1.41162900  -0.65263600
Cl      -2.89860600  -1.78215900  -1.65023200
Cl      -4.22425600  -1.34573000  1.67943000
  
```



### SM-C

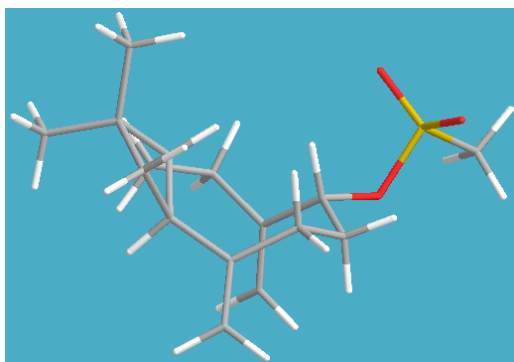

```

Zero-point correction=                0.398893
(Hartree/Particle)
Thermal correction to Energy=         0.420288
Thermal correction to Enthalpy=       0.421232
Thermal correction to Gibbs Free Energy= 0.348186
Sum of electronic and zero-point Energies= -1248.724241
Sum of electronic and thermal Energies= -1248.702846
Sum of electronic and thermal Enthalpies= -1248.701902
Sum of electronic and thermal Free Energies= -1248.774948

```

E(RB3LYP) = -1249.47307640 (THF)

```

O 1
C      1.13762300    0.47497000    0.15945000
C     -0.49504100    1.74208200   -1.41066200
C      0.46897500    0.40742700    1.52559200
C     -1.69033500    1.98077000   -0.50083300
C      0.48333400    1.45499200    2.35760000
C     -1.98841000    3.22545800   -0.09768100
H      0.05794400    1.38501700    3.35661000
H      0.91502800    2.41394900    2.08595000
H     -2.82238200    3.42677600    0.57152700
H     -1.40914500    4.08894100   -0.42070400
C     -0.15308000   -0.92245800    1.91074500
H      0.38538300   -1.73030300    1.39793400
C     -2.57952900    0.82558800   -0.10566200
H     -3.18122700    1.14618500    0.75333300
C     -2.07356200   -0.62843400    0.17320400
H     -1.26803600   -0.88004500   -0.52914800
C     -1.66537800   -1.04119000    1.59228400
C     -2.23023800   -0.44174200    2.31907700
C     -3.40280500   -1.17132500   -0.47233100
C     -3.53902700    0.21429300   -1.17283700
H     -4.53992100    0.65644500   -1.24578600
H     -3.08532000    0.20737500   -2.17154400
H     -0.01662600   -1.09267400    2.98587500
H     -1.95469300   -2.08766500    1.76601400
C     -3.24416000   -2.38726300   -1.38606300
H     -2.97691600   -3.28440500   -0.81074000
H     -4.17865700   -2.60443000   -1.92102400
H     -2.45963000   -2.22520600   -2.13564200
C     -4.53444400   -1.41273900    0.53699400
H     -5.48000700   -1.58615900    0.00689100
H     -4.33798400   -2.29607900    1.15769900
H     -4.68562500   -0.56022900    1.20935300
O     -0.44960400    2.55151400   -2.14904400
O      2.60219100    0.39363800    0.43911000
S      3.47296900   -0.65905800   -0.46248900
O      2.98499200   -2.02137700   -0.22335300
O      3.57037500   -0.17745600   -1.84406200
C      5.04171300   -0.41516100    0.37762100
H      5.33065700    0.63219600    0.27912500
H      4.92531700   -0.70108100    1.42381800
H      5.76198500   -1.06446100   -0.12558800
C      0.88904500    1.70604800   -0.71366200
H      1.65552400    1.69980800   -1.49613200
H      1.03051100    2.62069600   -0.12729000
H     -0.62513900    0.81672900   -1.98732300
H      0.88132000   -0.42301200   -0.40953300

```

### TS-C

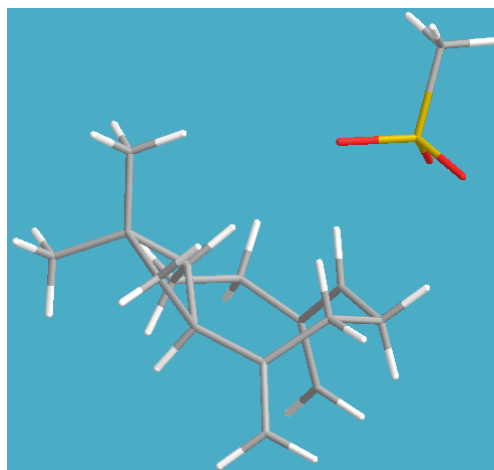

```

Zero-point correction=                0.395879
(Hartree/Particle)
Thermal correction to Energy=         0.417505
Thermal correction to Enthalpy=       0.418449
Thermal correction to Gibbs Free Energy= 0.344812
Sum of electronic and zero-point Energies= -1248.670121
Sum of electronic and thermal Energies= -1248.648495
Sum of electronic and thermal Enthalpies= -1248.647550
Sum of electronic and thermal Free Energies= -1248.721187

```

E(RB3LYP) = -1249.43318236 (THF)

```

O 1
C      0.57031700    1.40849800    0.55493100
C     -0.01766400    1.09846000   -1.78444400
C     -0.37391700    1.87663300    1.52537900
C     -1.50719000    1.24337300   -1.60139500
C     -0.72163800    3.19054900    1.55656500
C     -2.14419200    2.30417700   -2.13026900
H     -1.40144900    3.57449500    2.31375900
H     -0.29752400    3.91756300    0.87159400
H     -3.21585900    2.44663800   -2.00932000
H     -1.62037400    3.05192100   -2.72316100
C     -0.94273400    0.84083000    2.47412800
H     -0.13078600    0.16688400    2.77317500
C     -2.27711800    0.18071500   -0.85442900
H     -3.27547800    0.58059000   -0.63955300
C     -1.75987800   -0.55672500    0.43322000
H     -0.68570300   -0.76100400    0.34720700
C     -2.08089100    0.00865900    1.82513200
H     -2.99110400    0.62218700    1.77597100
C     -2.47239400   -1.86390200   -0.08609100
C     -2.43893900   -1.22543000   -1.50774000
H     -3.31370900   -1.36607000   -2.15354600
H     -1.53971200   -1.52419600   -2.05812000
H     -1.31591000    1.32363700    3.38446300
C     -2.30542800   -0.81706600    2.51309400
H     -1.67667300   -3.15646200    0.09746000
H     -1.63673200   -3.44853500    1.15595800
H     -2.14363200   -3.98348900   -0.45449500
C     -0.64562400   -3.04532000   -0.25645300
H     -3.90940500   -2.03915200    0.42493900
C     -4.40823000   -2.84159900   -0.13362200
H     -3.92798600   -2.31898100    1.48579700
H     -4.51456200   -1.13205300    0.30749800
H      0.29772100    1.49025300   -2.75638700
O      3.22739300    0.31963300    1.14584700
S      3.18157500   -0.56934600   -0.06684000
O      1.86675200   -1.30150200   -0.14526700
O      3.52522900    0.14661400   -1.33000300
C      4.45158400   -1.83102600    0.17463200
H      5.41877200   -1.32964800    0.25155100
H      4.22673200   -2.37817200    1.09253600
H      4.43455700   -2.50112900   -0.68780900
C      0.85102600    1.97791000   -0.74296300
H      1.89372800    1.78530700   -1.02722200
H      0.56719400    3.02517700   -0.86481200
H      0.33460900    0.06746900   -1.70401800
H      1.03454600    0.44408000    0.74641400

```

## INT-C

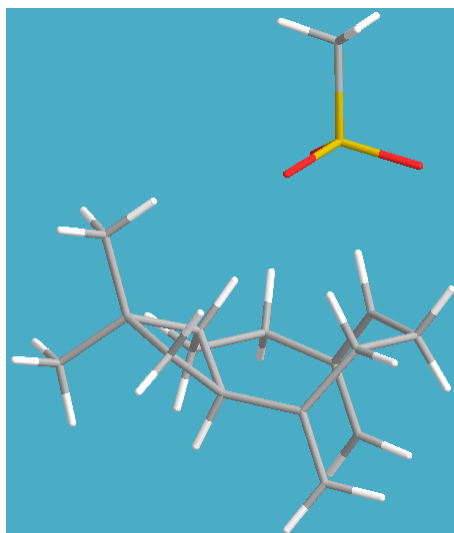

```

Zero-point correction=          0.396231
(Hartree/Particle)
Thermal correction to Energy=    0.418491
Thermal correction to Enthalpy=  0.419435
Thermal correction to Gibbs Free Energy= 0.344953
Sum of electronic and zero-point Energies= -1248.673526
Sum of electronic and thermal Energies= -1248.651266
Sum of electronic and thermal Enthalpies= -1248.650322
Sum of electronic and thermal Free Energies= -1248.724804
  
```

E(RB3LYP) = -1249.43452361 (THF)

```

O 1
C      -0.18418700  -1.93647200  0.71617100
C      0.11490200  -1.38455500  -1.65868500
C      1.03157600  -1.91935700  1.46264100
C      1.57091900  -1.03678300  -1.54366800
C      2.00024300  -2.84818500  1.21260300
C      2.50145800  -1.88004100  -2.04063300
H      2.93914700  -2.84132000  1.76198300
H      1.85460400  -3.66730500  0.51738100
H      3.56446100  -1.65765200  -1.97944000
H      2.22750000  -2.79709100  -2.55983500
C      1.22553100  -0.78462200  2.45235700
H      0.24257000  -0.47357600  2.82195700
C      1.98423000  0.25492200  -0.88748000
H      3.07121000  0.22041400  -0.74392100
C      1.33839300  0.82699700  0.42602000
H      0.25384700  0.66547600  0.42509500
C      1.92193800  0.43366400  1.78841100
H      2.99710500  0.22702700  1.68994100
C      1.55636500  2.27473800  -0.15727400
C      1.61952200  1.61019500  -1.56737200
C      2.34634300  2.00313600  -2.28851200
H      0.62800500  1.57892900  -2.03037500
H      1.81319200  -1.12190500  3.31412400
H      1.83358100  1.27828700  2.48448500
C      0.40958900  3.25752400  0.07810900
H      0.35012800  3.54427800  1.13746300
H      0.56411000  4.17724000  -0.50326800
H      -0.55106000  2.81990000  -0.21173800
C      2.89887500  2.90834200  0.23631600
H      3.07257300  3.81285300  -0.36079700
H      2.90568300  3.20763300  1.29220400
H      3.75253200  2.23886400  0.07310700
H      -0.09964900  -1.87244400  -2.61504600
O      -2.26434300  0.18034800  1.34545200
S      -2.90532700  0.20085200  -0.01854400
O      -2.13932400  1.04183200  -0.99050600
C      -3.18692300  -1.17819600  -0.52703600
O      -4.50996800  1.00273100  0.20234900
C      -5.09354500  0.41382900  0.91303400
H      -4.34156800  2.01167800  0.58479800
H      -5.00832900  1.03784800  -0.76879800
C      -0.37131100  -2.52323000  -0.58983700
H      -1.43544700  -2.66311800  -0.80061100
H      0.23133900  -3.41095200  -0.79336400
H      -0.55119800  -0.52449600  -1.55462100
H      -1.00565000  -1.30824000  1.08801700
  
```

## SM-D

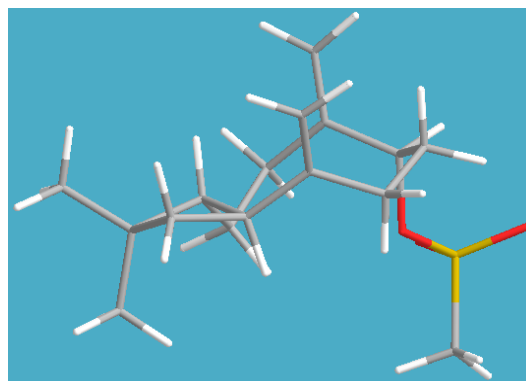

```

Zero-point correction=          0.398853
(Hartree/Particle)
Thermal correction to Energy=    0.420207
Thermal correction to Enthalpy=  0.421152
Thermal correction to Gibbs Free Energy= 0.347498
Sum of electronic and zero-point Energies= -1248.720946
Sum of electronic and thermal Energies= -1248.699591
Sum of electronic and thermal Enthalpies= -1248.698647
Sum of electronic and thermal Free Energies= -1248.772301
  
```

E(RB3LYP) = -1249.47015126 (THF)

```

O 1
C      -1.47636100  0.99342200  0.64836300
C      0.05099200  2.01015400  -1.26235900
C      -0.48672100  0.45825200  1.68405400
C      1.50504700  1.87759200  -0.80955100
C      -0.08147400  1.28092900  2.66074300
C      2.18619500  2.96198400  -0.41200000
H      0.59107800  0.93879500  3.44286400
H      -0.40336700  2.31796300  2.72688400
H      3.22698900  2.91847300  -0.10423600
H      1.71893200  3.94473300  -0.37577200
C      -0.05600800  -0.99313800  1.65636400
H      0.45529500  -1.19486700  2.60573600
C      2.12912000  0.50575900  -0.90555500
H      1.67946400  -0.00337200  -1.76928300
C      2.09440600  -0.50008500  0.29882800
H      2.27952100  0.07424600  1.21637400
C      0.88529400  -1.41913800  0.50200300
H      0.31690600  -1.49916600  -0.43196700
C      -1.03526000  2.21132600  -0.18125500
H      -0.71966800  2.99469600  0.51746500
H      -1.93808300  2.58142700  -0.68317200
C      -0.22618300  1.14796200  -1.88004300
H      3.48137200  -1.05596200  -0.18877500
C      3.66295500  0.28720000  -0.96178500
H      4.12097000  0.24428300  -1.95751900
H      4.21161300  1.01675500  -0.35635600
H      -0.94574400  -1.63491800  1.63660900
H      1.22779500  -2.43690600  0.73708700
C      4.50001500  -1.35100400  0.91325400
H      4.19358600  -2.21756900  1.51551000
H      5.48825400  -1.57694200  0.48967200
H      4.61339100  -0.49554700  1.59066000
C      3.37465700  -2.25383200  -1.14331600
H      4.34719800  -2.44878200  -1.61411500
H      3.07749100  -3.16686800  -0.61191800
H      2.64778200  -2.08551100  -1.94675900
H      -0.01700700  2.88519800  -1.92138800
O      -1.85052200  -0.06730700  -0.30426400
H      -2.39039200  1.28781700  1.17498200
S      -3.38713800  -0.63688100  -0.23760600
O      -3.50658400  -1.61099000  0.84885700
O      -4.32157400  0.49073800  -0.29419300
C      -3.36781400  -1.49812200  -1.81369400
H      -3.20990400  -0.77027300  -2.61054200
H      -2.57516600  -2.24762300  -1.79247700
H      -4.34561400  -1.97545100  -1.91180800
  
```

**TS-D**

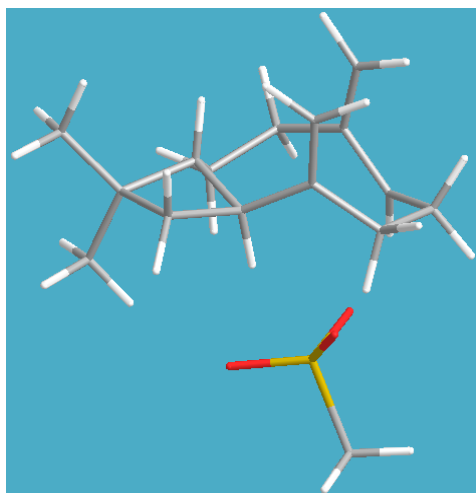

```

Zero-point correction=                0.396576
(Hartree/Particle)
Thermal correction to Energy=         0.417785
Thermal correction to Enthalpy=       0.418729
Thermal correction to Gibbs Free Energy= 0.347270
Sum of electronic and zero-point Energies= -1248.670710
Sum of electronic and thermal Energies= -1248.649502
Sum of electronic and thermal Enthalpies= -1248.648557
Sum of electronic and thermal Free Energies= -1248.720017
    
```

E(RB3LYP) = -1249.43011842 (THF)

| 0 1 |             |             |             |
|-----|-------------|-------------|-------------|
| C   | -0.82220000 | 1.98011300  | 0.66190400  |
| C   | 0.20944400  | 2.14132600  | -1.68563900 |
| C   | 0.27110600  | 1.71916600  | 1.53277600  |
| C   | 1.47250900  | 1.45442300  | -1.23045500 |
| C   | 1.33687600  | 2.58225300  | 1.54862600  |
| C   | 2.63175300  | 2.14517400  | -1.15776400 |
| H   | 2.17990300  | 2.40972400  | 2.21290200  |
| H   | 1.33874800  | 3.52431900  | 1.01526100  |
| H   | 3.56669100  | 1.67528200  | -0.86231800 |
| H   | 2.68839700  | 3.19665200  | -1.43260900 |
| C   | 0.28733400  | 0.46772800  | 2.39128800  |
| C   | 0.99296200  | 0.62312000  | 3.21606600  |
| C   | 1.37662300  | -0.01552500 | -0.88298900 |
| H   | 0.36555600  | -0.36028800 | -1.11031300 |
| C   | 1.78097100  | -0.58311000 | 0.53234200  |
| H   | 2.60562000  | 0.02067200  | 0.94134100  |
| C   | 0.69114900  | -0.79946000 | 1.58763300  |
| H   | -0.19741400 | -1.22443700 | 1.11365200  |
| C   | -0.68449700 | 2.82027700  | -0.53475000 |
| H   | -0.18436100 | 3.76464000  | -0.28796300 |
| H   | -1.66083600 | 3.03606100  | -0.97167300 |
| H   | -0.45255100 | 1.42568200  | -2.17515500 |
| C   | 2.40484000  | -1.83617700 | -0.18631700 |
| C   | 2.41693400  | -1.00235200 | -1.50076300 |
| H   | 2.10634600  | -1.51139000 | -2.42052800 |
| H   | 3.38740800  | -0.52290400 | -1.67370000 |
| H   | -0.70486200 | 0.30730800  | 2.82761500  |
| H   | 1.03662700  | -1.54820500 | 2.31430300  |
| C   | 3.77104200  | -2.27842500 | 0.34031500  |
| C   | 3.68709200  | -2.70534500 | 1.34913600  |
| H   | 4.21173500  | -3.04857600 | -0.30700600 |
| H   | 4.47665300  | -1.43859200 | 0.38827700  |
| C   | 1.45277900  | -3.03724800 | -0.28266500 |
| H   | 1.86538400  | -3.78049200 | -0.97772300 |
| H   | 1.32833600  | -3.52794100 | 0.69053500  |
| H   | 0.45412300  | -2.76130500 | -0.63679300 |
| H   | 0.44145100  | 2.95658000  | -2.37905900 |
| O   | -1.90489500 | 0.11295600  | -0.96142800 |
| H   | -1.77376100 | 1.49541500  | 0.87971100  |
| S   | -2.79977000 | -0.74850400 | -0.08782900 |
| O   | -2.27252100 | -2.12323800 | 0.08911100  |
| O   | -3.13611300 | -0.02935400 | 1.18163800  |
| C   | -4.34992900 | -0.90663400 | -1.00777300 |
| H   | -4.76612300 | 0.08985300  | -1.16978300 |
| H   | -4.13722300 | -1.39774700 | -1.95971200 |
| H   | -5.03176100 | -1.51411500 | -0.40839100 |

**INT-D**

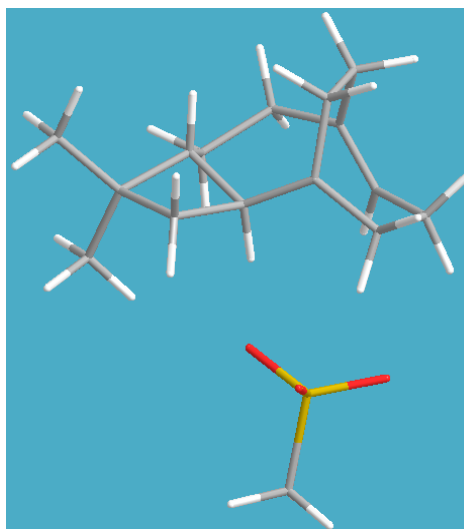

```

Zero-point correction=                0.399132
(Hartree/Particle)
Thermal correction to Energy=         0.420340
Thermal correction to Enthalpy=       0.421285
Thermal correction to Gibbs Free Energy= 0.348991
Sum of electronic and zero-point Energies= -1248.685749
Sum of electronic and thermal Energies= -1248.664541
Sum of electronic and thermal Enthalpies= -1248.663597
Sum of electronic and thermal Free Energies= -1248.735890
    
```

E(RB3LYP) = -1249.44858342 (THF)

| 0 1 |             |             |             |
|-----|-------------|-------------|-------------|
| C   | 0.04836600  | -2.14460800 | 0.94036700  |
| C   | 0.28670300  | -1.74334600 | -1.67021400 |
| C   | -1.27106400 | -1.97384300 | 1.16047500  |
| C   | -0.94650200 | -1.04585400 | -1.33855900 |
| C   | -2.25991900 | -2.49661300 | 0.13631700  |
| C   | -2.21310400 | -1.78715400 | -1.32953400 |
| H   | -3.28800900 | -2.39725900 | 0.49248100  |
| H   | -2.07169500 | -3.55747100 | -0.05401400 |
| H   | -3.07718300 | -1.12637900 | -1.42346700 |
| H   | -2.25602800 | -2.56456500 | -2.09542200 |
| C   | -1.78239900 | -1.03688900 | 2.24087800  |
| C   | -2.84480200 | -1.23304800 | 2.43775700  |
| C   | -0.87995700 | 0.25173600  | -0.68684700 |
| H   | 0.13647200  | 0.44934500  | -0.33294000 |
| C   | -1.93358300 | 0.73017300  | 0.36420800  |
| H   | -2.92770100 | 0.32195100  | 0.13466600  |
| C   | -1.58565600 | 0.45384400  | 1.83268600  |
| C   | -0.54050900 | 0.73083500  | 2.00448800  |
| H   | 0.57717300  | -2.69805400 | -0.35047300 |
| H   | 0.13591000  | -3.67110800 | -0.59253000 |
| H   | 1.66633500  | -2.76328700 | -0.32294900 |
| H   | 1.13721600  | -1.06099800 | -1.77824200 |
| H   | -1.86266500 | 2.17052100  | -0.26187300 |
| C   | -1.29553500 | 1.52190400  | -1.56474200 |
| H   | -0.44513600 | 1.99575300  | -2.06091500 |
| H   | -2.08014700 | 1.28669700  | -2.29196900 |
| H   | -1.24828700 | -1.21143600 | 3.18234500  |
| C   | -2.20583600 | 1.08816900  | 2.48219100  |
| H   | -3.20675800 | 2.88125900  | -0.42218300 |
| H   | -3.61294900 | 3.17203400  | 0.55555000  |
| H   | -3.09831800 | 3.79632300  | -1.01885900 |
| H   | -3.94922600 | 2.24255800  | -0.91837700 |
| C   | -0.83202600 | 3.09070500  | 0.40573800  |
| H   | -0.69505300 | 3.99551700  | -0.20047400 |
| H   | -1.18209600 | 3.40627400  | 1.39678800  |
| H   | 0.14466300  | 2.61159600  | 0.52970200  |
| O   | 0.18386300  | -2.42661500 | -2.51767600 |
| H   | 3.18235700  | -1.06390100 | 0.38497200  |
| O   | 0.78258800  | -1.71384300 | 1.61706500  |
| S   | 2.86014200  | 0.35973900  | 0.06597500  |
| C   | 2.45456100  | 0.56321700  | -1.36633900 |
| O   | 1.86893400  | 0.96764200  | 1.01659200  |
| C   | 4.39881300  | 1.28562000  | 0.28598400  |
| H   | 4.72300100  | 1.16913800  | 1.32244800  |
| H   | 5.14536500  | 0.87526900  | -0.39750200 |
| H   | 4.20714100  | 2.33664000  | 0.05908700  |
